# Supplementary material for: Opioid-sparing effects of medical cannabis or cannabinoids for chronic pain: a systematic review and meta-analysis of randomised and observational studies
Source: PubMed Central journal article supplement — BMJ Open. 2021 Jul 28;11(7):e047717. doi: 10.1136/bmjopen-2020-047717 (PMC8319983; doi:10.1136/bmjopen-2020-047717), 2021-07-28
Supplement: bmjopen-2020-047717.draft_revisions.pdf [file bmjopen-2020-047717.draft_revisions.pdf]

# BMJ Open

BMJ Open is committed to open peer review. As part of this commitment we make the peer review history of every article we publish publicly available.

When an article is published we post the peer reviewers' comments and the authors' responses online. We also post the versions of the paper that were used during peer review. These are the versions that the peer review comments apply to.

The versions of the paper that follow are the versions that were submitted during the peer review process. They are not the versions of record or the final published versions. They should not be cited or distributed as the published version of this manuscript.

BMJ Open is an open access journal and the full, final, typeset and author-corrected version of record of the manuscript is available on our site with no access controls, subscription charges or pay-per-view fees (<http://bmjopen.bmj.com>).

If you have any questions on BMJ Open's open peer review process please email [info.bmjopen@bmj.com](mailto:info.bmjopen@bmj.com)

# BMJ Open

## Opioid-Sparing effects of medical cannabis for chronic pain: A systematic review and meta-analysis of randomized and observational studies

|                               |                                                                                                                                                                                                                                                                                                                                                                                                                                                                                                                                                                                                                                                                                                                                                                                                                                                                                                                                                                                        |
|-------------------------------|----------------------------------------------------------------------------------------------------------------------------------------------------------------------------------------------------------------------------------------------------------------------------------------------------------------------------------------------------------------------------------------------------------------------------------------------------------------------------------------------------------------------------------------------------------------------------------------------------------------------------------------------------------------------------------------------------------------------------------------------------------------------------------------------------------------------------------------------------------------------------------------------------------------------------------------------------------------------------------------|
| Journal:                      | <i>BMJ Open</i>                                                                                                                                                                                                                                                                                                                                                                                                                                                                                                                                                                                                                                                                                                                                                                                                                                                                                                                                                                        |
| Manuscript ID                 | bmjopen-2020-047717                                                                                                                                                                                                                                                                                                                                                                                                                                                                                                                                                                                                                                                                                                                                                                                                                                                                                                                                                                    |
| Article Type:                 | Original research                                                                                                                                                                                                                                                                                                                                                                                                                                                                                                                                                                                                                                                                                                                                                                                                                                                                                                                                                                      |
| Date Submitted by the Author: | 07-Dec-2020                                                                                                                                                                                                                                                                                                                                                                                                                                                                                                                                                                                                                                                                                                                                                                                                                                                                                                                                                                            |
| Complete List of Authors:     | Noori, Atefeh; McMaster University, Department of Health Research Methods, Evidence, and Impact<br>Miroshynchenko, Anna; McMaster University, Department of Health Research Methods, Evidence, and Impact<br>Shergill, Yaad; McMaster University<br>Ashoorion, Vahid; McMaster University, Department of Health Research Methods, Evidence, and Impact<br>Rehman, Yasir ; McMaster University Faculty of Health Sciences, Department of Health Research Methods, Evidence, and Impact<br>Couban, Rachel; McMaster University, Michael G. DeGroote Institute for Pain Research and Care<br>Buckley, D; McMaster University Faculty of Health Sciences, Department of Health Research Methods, Evidence, and Impact<br>Thabane, Lehana; McMaster University<br>Bhandari, Mohit; McMaster University, Surgery<br>Guyatt, Gordon; McMaster University<br>Agoritsas, Thomas; University of Geneva Faculty of Medicine; McMaster University<br>Busse, Jason; McMaster University, Anesthesia |
| Keywords:                     | PAIN MANAGEMENT, Cancer pain < ONCOLOGY, GENERAL MEDICINE (see Internal Medicine)                                                                                                                                                                                                                                                                                                                                                                                                                                                                                                                                                                                                                                                                                                                                                                                                                                                                                                      |
|                               |                                                                                                                                                                                                                                                                                                                                                                                                                                                                                                                                                                                                                                                                                                                                                                                                                                                                                                                                                                                        |

SCHOLARONE™  
Manuscripts

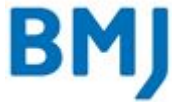

I, the Submitting Author has the right to grant and does grant on behalf of all authors of the Work (as defined in the below author licence), an exclusive licence and/or a non-exclusive licence for contributions from authors who are: i) UK Crown employees; ii) where BMJ has agreed a CC-BY licence shall apply, and/or iii) in accordance with the terms applicable for US Federal Government officers or employees acting as part of their official duties; on a worldwide, perpetual, irrevocable, royalty-free basis to BMJ Publishing Group Ltd ("BMJ") its licensees and where the relevant Journal is co-owned by BMJ to the co-owners of the Journal, to publish the Work in this journal and any other BMJ products and to exploit all rights, as set out in our [licence](#).

The Submitting Author accepts and understands that any supply made under these terms is made by BMJ to the Submitting Author unless you are acting as an employee on behalf of your employer or a postgraduate student of an affiliated institution which is paying any applicable article publishing charge ("APC") for Open Access articles. Where the Submitting Author wishes to make the Work available on an Open Access basis (and intends to pay the relevant APC), the terms of reuse of such Open Access shall be governed by a Creative Commons licence – details of these licences and which [Creative Commons](#) licence will apply to this Work are set out in our licence referred to above.

Other than as permitted in any relevant BMJ Author's Self Archiving Policies, I confirm this Work has not been accepted for publication elsewhere, is not being considered for publication elsewhere and does not duplicate material already published. I confirm all authors consent to publication of this Work and authorise the granting of this licence.

## Opioid-Sparing effects of medical cannabis for chronic pain: A systematic review and meta-analysis of randomized and observational studies

Atefeh Noori *PhD candidate*<sup>1,2</sup>, Anna Miroshnychenko *M.Sc. (Cand.)*<sup>1</sup>, Yaadwinder Shergill *M.Sc. (Cand.)*<sup>1</sup>, Vahid Ashoorion *PhD*<sup>1</sup>, Yasir Rehman *PhD candidate*<sup>1</sup>, Rachel Couban *medical librarian*<sup>2</sup>, Norman Buckley *professor*<sup>1</sup>, Lehana Thabane *professor*<sup>1</sup>, Mohit Bhandari *professor*<sup>1,3</sup>, Gordon H. Guyatt *distinguished professor*<sup>1</sup>, Thomas Agoritsas *assistant professor*<sup>1,4</sup>, Jason W. Busse *associate professor*<sup>1,5,6,7\*</sup>

### Affiliations

1. Department of Health Research Methods, Evidence, and Impact, McMaster University, Hamilton, ON, Canada
2. The Michael G. DeGroote National Pain Center, McMaster University, Hamilton, ON, Canada
3. Division of Orthopaedic Surgery, Department of Surgery, McMaster University, Hamilton, ON, Canada
4. Division of of General Internal Medicine, Department of Medicine, University Hospitals of Geneva, Geneva, Switzerland
5. Department of Anesthesia, McMaster University, Hamilton, ON, Canada
6. The Chronic Pain Centre of Excellence for Canadian Veterans, Hamilton, ON, Canada
7. The Michael G. DeGroote Centre for Medicinal Cannabis Research, McMaster University, Hamilton, ON, Canada

**Corresponding Author:** Jason W. Busse, Michael G. DeGroote Centre for Medicinal Cannabis Research, McMaster University, HSC-2V9, 1280 Main St. West, Hamilton, Canada, L8S 4K1; email: [bussejw@mcmaster.ca](mailto:bussejw@mcmaster.ca)

### Strengths and limitations of this study

- This is the first systematic review of randomized controlled trials and observational studies exploring the impact of medical cannabis on prescription opioid use among people living with chronic pain.
- We conducted a comprehensive search for eligible studies, without language restrictions, and evaluated the certainty of evidence using the GRADE approach.
- All eligible randomized trials enrolled patients with chronic cancer-related pain, and the generalizability of their results to non-cancer chronic pain is uncertain.
- Most observational studies incorporated inadequate adjustment for confounding, and all randomized trials, despite reporting this outcome, were not designed to address the effect of medical cannabis on opioid use.

## ABSTRACT

**Objective:** To assess the efficacy and harms of adding medical cannabis to prescription opioids among people living with chronic pain.

**Design:** Systematic review and meta-analysis.

**Data sources:** CENTRAL, EMBASE, and MEDLINE, from inception to March 2020, with no language restrictions.

**Main outcomes and measures:** Opioid dose reduction, pain relief, sleep disturbance, physical and emotional functioning, and three adverse events.

**Study selection criteria and methods:** We included randomized trials and observational studies that enrolled patients with chronic pain receiving prescription opioids and explored the impact of adding medical cannabis. Pairs of trained reviewers independently screened studies for eligibility, extracted data, and assessed risk of bias. We performed random-effects meta-analyses and used GRADE to assess the certainty of evidence for each outcome.

**Results:** Eligible studies included five randomized trials (all enrolling chronic cancer-pain patients) and 12 observational studies. All randomized trials instructed participants to maintain their opioid dose, which resulted in a very low certainty evidence that adding cannabis has little or no impact on opioid use (weighted mean difference [WMD] -3.4 milligram morphine equivalent [MME]; 95% confidence interval [CI] -12.7 to 5.8). Randomized trials provided high certainty evidence that cannabis addition had little or no effect on pain relief (WMD -0.18cm; 95%CI -0.38 to 0.02; on a 10 cm visual analogue scale [VAS] for pain) or sleep disturbance (WMD -0.22 cm; 95%CI -0.4 to -0.06; on a 10 cm VAS for sleep disturbance; minimally important difference [MID] is 1 cm) among chronic cancer-pain patients. Addition of cannabis likely increases nausea (relative risk [RR] 1.43; 95%CI 1.04 to 1.96; risk difference [RD] 4%,

1  
2  
3 95%CI 0% to 7%) and vomiting (RR 1.5; 95%CI 1.01 to 2.24; RD 3%; 95%CI 0% to 6%) (both  
4  
5 moderate certainty), and may have little or no effect on constipation (RR 0.85; 95%CI 0.54 to  
6  
7 1.35; RD -1%; 95%CI -4% to 2%) (low certainty). Eight observational studies provided very-low  
8  
9 certainty evidence that adding cannabis reduced opioid use (WMD -22.5 MME; 95%CI -43.06 to  
10  
11 -1.97; 8 studies).

12  
13  
14 **Conclusion:** Opioid-sparing effects of medical cannabis for chronic pain remain uncertain due to  
15  
16 very-low certainty evidence. Based on moderate-to-high certainty evidence, adding medical  
17  
18 cannabis to opioid therapy, among chronic cancer-pain patients, influences neither pain relief nor  
19  
20 sleep disturbance and increases the risk of nausea and vomiting.  
21  
22

23  
24  
25  
26  
27  
28 **Keywords:** chronic pain; opioids; cannabis; cannabinoids; drug substitution; sparing effect;  
29  
30 tapering  
31  
32

33  
34  
35 **Systematic review registration** PROSPERO CRD42018091098  
36  
37

38  
39  
40 **Funding Source:** This review received no external funding  
41  
42  
43  
44  
45  
46  
47  
48  
49  
50  
51  
52  
53  
54  
55  
56  
57  
58  
59  
60

## Introduction

Chronic pain affects approximately one in five adults and is a common reason for seeking medical care.<sup>1, 2</sup> Opioids are commonly prescribed for this condition, particularly in North America;<sup>3</sup> however, they are associated with harms such as overdose and death,<sup>4, 5</sup> which are dose-dependent.<sup>6-9</sup> As a result, there is considerable interest in therapies that may allow patients with chronic pain using opioid therapy to reduce their opioid intake.

One promising approach is adding cannabis therapy. Experimental studies have shown that opioids and cannabis have similar signal transduction systems,<sup>10</sup> and observational studies in the US demonstrated that the rates of opioid-related mortality reduced after cannabis was legalized.<sup>11-13</sup> Between 64% and 77% of patients with chronic pain responding to cross-sectional surveys reported a reduction in long-term opioid use after adding medical cannabis to their treatment.<sup>14, 15</sup> A 2017 systematic review concluded that pre-clinical studies provided robust evidence for the opioid-sparing effects of cannabis.<sup>16</sup> To clarify the issue, we undertook a systematic review of randomized controlled trials and observational studies to explore the impact of adding medical cannabis on opioid dose, other patient-important outcomes, and related harms in patients with chronic pain using prescribed opioid therapy.

This systematic review is part of the BMJ Rapid Recommendations project, a collaborative effort from the MAGIC Evidence Ecosystem Foundation ([www.magicvidence.org](http://www.magicvidence.org)) and BMJ. This systematic review informed a parallel guideline published on BMJ.com<sup>17</sup> and MAGICapp (<https://app.magicapp.org/#/guideline/jMMYPj>).



## METHOD

We followed standards for meta-analysis of observational studies in epidemiology (MOOSE)<sup>18</sup> and preferred reporting items for systematic reviews and meta-analyses (PRISMA) guidelines<sup>19</sup> and registered our review (PROSPERO Identifier: CRD42018091098).

### Eligibility criteria

We included randomized controlled trials (RCTs), observational studies, including cohort studies and case-control studies, in any language, that explored the impact of adding medicinal cannabis (i.e. phytocannabinoids, endocannabinoids, or synthetic cannabinoids) on the use of prescription opioids among people living with chronic pain. We defined pain as chronic if patients reported that symptoms had persisted for  $\geq 3$  months.<sup>20</sup> We excluded editorials, letters to the editor, pre-clinical studies, conference abstracts, case reports, case series, cross-sectional studies, studies with less than 2-weeks follow-up, and studies of recreational cannabis use. We classified observational study designs according to recommendations by the Cochrane Observational Studies Methods Group.<sup>21</sup>

### Literature search and study selection

We searched the Cochrane Central Register of Controlled Trials (CENTRAL), EMBASE, and MEDLINE from inception to March 2020 with no restriction on language of publication. An experienced medical librarian (RC) developed our database-specific search strategies (Appendix A). We also searched the ClinicalTrials.gov registry to identify ongoing trials, and reference lists of all eligible studies and related systematic reviews for additional eligible studies. Two teams of paired reviewers independently screened titles, abstracts and full-text studies for eligibility using

1  
2  
3 online systematic review software (Rayyan QCRI, Qatar Computing Research Institute).  
4

5 Reviewers resolved disagreements through discussion.  
6  
7  
8  
9

## 10 **Data collection**

11  
12 Using standardized forms and a detailed instruction manual, pairs of reviewers independently  
13 abstracted data from each eligible study, including study and patient characteristics, and details  
14 of treatment (e.g. dose, formulation, and duration of cannabis add-on therapy). Our primary  
15 outcome was opioid dose. We also captured patient-important outcomes, as guided by the  
16 Initiative on Methods, Measurement, and Pain Assessment in Clinical Trials,<sup>22</sup> including pain  
17 relief, sleep disturbance, physical and emotional functioning. Regarding adverse events, we  
18 focused on vomiting, nausea, and constipation as a systematic review of values and preferences<sup>23</sup>  
19 demonstrated that patients living with chronic pain experience gastrointestinal complaints as the  
20 most important opioid-induced adverse events. We contacted authors to obtain unpublished data.  
21  
22  
23  
24  
25  
26  
27  
28  
29  
30  
31  
32  
33  
34

## 35 **Risk of bias assessment**

36  
37 Following training and calibration exercises two independent reviewers used a modified  
38 Cochrane risk of bias tool<sup>24, 25</sup> to assess the risk of bias among eligible RCTs according to the  
39 following domains: allocation concealment, blinding of participants, study personnel, outcome  
40 assessors and data analyst, and loss to follow-up ( $\geq 20\%$  missing data was assigned high risk of  
41 bias). Response options for each item were 'definitely or probably yes' (assigned a low risk of  
42 bias) and 'definitely or probably no' (assigned a high risk of bias). (Supplement Table 1) We used  
43 criteria suggested by the CLARITY group<sup>26</sup> to assess the risk of bias of observational studies  
44 including selection bias, confidence that all patients had the condition of interest, control for  
45  
46  
47  
48  
49  
50  
51  
52  
53  
54  
55  
56  
57  
58  
59  
60

1  
2  
3 confounding variables, validity of outcome assessment(s), and infrequent missing data (<20%)  
4 (details available at [www.evidencepartners.com/resources/methodological-resources/](http://www.evidencepartners.com/resources/methodological-resources/)).  
5  
6  
7 (Supplement Tables 2-3).  
8  
9

## 12 **Data analysis**

14 We calculated inter-rater agreement regarding the eligibility of full-text studies using an adjusted  
15  $\kappa$  statistic.<sup>27</sup> We conducted separate analyses for randomized controlled trials and observational  
16 studies. All continuous measures for pain intensity and sleep disturbance were converted to a 10  
17 cm visual analogue scale (VAS); the minimally important difference (MID) for both was 1 cm.<sup>28</sup>  
18  
19  
20  
21  
22  
23  
24  
25  
26  
27  
28  
29  
30  
31  
32  
33  
34  
35  
36  
37  
38  
39  
40  
41  
42  
43  
44  
45  
46  
47  
48  
49  
50  
51  
52  
53  
54  
55  
56  
57  
58  
59  
60

<sup>29</sup> All continuous outcomes that were reported by more than one study were pooled to derive the weighted mean difference (WMD) and associated 95% confidence interval (95% CI). We pooled binary outcomes (adverse events) as relative risks (RRs) and risk differences (RDs) and their associated 95% CIs. We conducted all meta-analyses with random-effects models and the DerSimonian-Laird method.<sup>30</sup>

When studies reported effects on continuous outcomes as the median and interquartile range, we derived the mean and SD using the method presented by Wan *et al.*<sup>31</sup> We also converted medians to means using the approach recommended by the Cochrane Handbook as a sensitivity analysis. When authors failed to report a measure of precision associated with mean differences, we imputed the SD from eligible studies that reported these measures (Technical appendix).<sup>32</sup> We included each comparison reported by multi-arm studies and calculated a correction factor to account for the unit of analysis error (i.e. when information from a treatment arm is used more than once in the same meta-analysis).<sup>33</sup> We explored the consistency of the association between our pooled results and studies reporting the same outcome domains that

1  
2  
3 were not possible to pool. We used Stata (StataCorp, Release 15.1, College Station, Texas) for  
4  
5 all analyses. Comparisons were 2-tailed using a threshold of  $p \leq 0.05$ .  
6  
7  
8  
9

### 10 **Subgroup analyses and meta-regression**

11  
12 We examined heterogeneity among pooled RCTs using the  $I^2$  statistic, and through visual  
13  
14 inspection of forest plots for pooled observational data, because statistical tests of heterogeneity  
15  
16 can be misleading when sample sizes are large and associated confidence intervals, are therefore  
17  
18 narrow.<sup>34</sup> When we had at least two studies in each subgroup, we explored sources of  
19  
20 heterogeneity with five pre-specified subgroup hypotheses, assuming greater benefits with (1)  
21  
22 shorter vs. longer duration of follow-up; (2) higher vs. lower risk of bias; (3) enriched vs non-  
23  
24 enriched study design; (4) chronic non-cancer vs. chronic cancer-related pain; and (5) higher vs  
25  
26 lower tetrahydrocannabinol [THC] content. We assumed similar directions of subgroup effects  
27  
28 for harms, except for study design and THC content in which we expected greater harms with  
29  
30 non-enriched trials and higher THC content. However, apart from item two (risk of bias), studies  
31  
32 did not report sufficient data to undertake subgroup analyses.  
33  
34  
35  
36  
37  
38  
39

### 40 **The certainty of the evidence**

41  
42 We used the Grading of Recommendations Assessment, Development and Evaluation (GRADE)  
43  
44 approach to assess the certainty of evidence on an outcome-by-outcome basis as high, moderate,  
45  
46 low or very low.<sup>35</sup> With GRADE, RCTs begin as high-certainty evidence, but can be rated down  
47  
48 because of risk of bias, imprecision, inconsistency, indirectness, or publication bias. We rated  
49  
50 down for imprecision if the 95% CI associated with a pooled continuous outcome included  $\frac{1}{2}$  the  
51  
52  
53  
54  
55  
56  
57  
58  
59  
60

1  
2  
3 MID, or if the estimate of precision associated with the RR for binary outcomes included no  
4  
5 effect.  
6

7  
8         Using GRADE, observational studies begin as low certainty evidence, and while they can  
9  
10 be rated down further for the same reasons as RCTs, they can also be rated up in the presence of  
11  
12 a large magnitude of the effect, a dose-response gradient, or presence of plausible confounders or  
13  
14 other biases that increase confidence in the estimated effect.<sup>36</sup> We only reported the pooling  
15  
16 results of observational studies when they resulted in the same or higher certainty of evidence  
17  
18 than evidence from RCTs. When there were at least 10 studies for meta-analysis, we explored for  
19  
20 small-study effects by visual assessment of funnel plot asymmetry and Egger's statistical test.<sup>37</sup>  
21  
22  
23  
24  
25  
26  
27  
28  
29  
30  
31  
32  
33  
34  
35  
36  
37  
38  
39  
40  
41  
42  
43  
44  
45  
46  
47  
48  
49  
50  
51  
52  
53  
54  
55  
56  
57  
58  
59  
60

## RESULTS

Of 5133 records identified, we reviewed 133 articles in full text, and 18 studies reported in 17 publications proved eligible (Figure 1); five RCTs in four publications<sup>38-41</sup> and 13 observational studies.<sup>42-54</sup> One study enrolled a mixed group of opioid and non-opioid users;<sup>45</sup> however, our attempts to contact the authors to acquire pain intensity data for the sub-group of patients prescribed opioids proved unsuccessful. All five RCTs<sup>38-41</sup> and three observational studies<sup>46, 49, 50</sup> enrolled patients with chronic cancer-related pain; the remaining 9 observational studies explored adding cannabis to opioids for patients with chronic non-cancer pain,<sup>43, 47, 48, 51-53</sup> or a mix of cancer and non-cancer pain (Table 1).<sup>42, 44, 45, 54</sup>

Among the 18 included studies, the percentage of female participants was 48% (median of individual trials 48.3%, interquartile range [IQR] 42.7% to 58.4%), and the median of the mean age was 56.3 (IQR 51.2 to 59.9). Follow-up ranged from 2 to 5 weeks among RCTs, and from 4 weeks to 6.4 years for observational studies. Only 1 RCT<sup>38</sup> used an enrichment design (following the open-label phase, patients with at least 15% improvement in pain were randomized to the intervention and control groups) and all RCTs advised patients to maintain stable doses of all other prescribed pain medications, including opioids, during the study period (Table 1). All included RCTs, and three of the observational studies<sup>42, 46, 47</sup> administered synthetic cannabis products (i.e. nabilone, dronabinol, and nabiximole), five observational studies<sup>44, 45, 52-54</sup> reported different combinations of THC: CBD products, and 5 other observational studies<sup>43, 48-51</sup> did not provide details of cannabis type (Table 1, Supplement Table 4). 10 studies reported receiving industry funding,<sup>38-41, 44, 46, 47, 51, 52</sup> five studies<sup>45, 48-50, 54</sup> reported no-industry funding, and three studies<sup>42, 43, 53</sup> did not report funding information (Table 1).

### **Risk of bias of included studies**

All included RCTs reported adequate allocation concealment and blinding of patients and health-care providers; however, three trials<sup>38, 40, 41</sup> were at risk of bias due to high loss to follow up (Supplement Table 5). All observational studies were at high risk of bias, typically due to lack of confidence in the assessment of exposure, non-representative samples, and insufficient control for confounding (Supplement Tables 6-7).

### **Outcomes for medical cannabis add-on therapy**

#### **Opioid dose reduction**

The primary limitation of RCTs was that all investigators instructed patients to not alter their dose of opioids. This represents a very serious indirectness of the findings regarding the research question, warranting rating down two levels, and was the primary reason for very low certainty evidence from the 1176 patients.<sup>38-40</sup> Their results raised the possibility that adding medical cannabis may not be associated with a reduction in opioid use (WMD -3.4 MME; 95%CI -12.7 to 5.9; table 2; Supplement Figure 1). There were no differences in effect based on the loss to follow-up (Supplement Figure 2; test of interaction  $P=0.79$ ).

Very-low certainty evidence from 8 observational studies<sup>42, 43, 45, 46, 48-50, 52</sup> raised the possibility that adding medical cannabis may reduce the use of opioids among patients with chronic pain (WMD -22.5 MME; 95%CI -43.06 to -1.97; Table 2; Supplement Figure 3). Three observational studies that could not be pooled reported consistent results. The first study assessed the impact of providing medical cannabis to 61 patients with chronic low back pain who were prescribed opioid therapy (median opioid dose was 21 mg MME/day) and reported that 52% of patients (32 of 61) stopped all use of opioids at a median follow-up of 6.4 years.<sup>51</sup> The second

1  
2  
3 study <sup>44</sup> reported that of 94 patients with chronic pain (both cancer and non-cancer pain) who  
4 began using CBD hemp extract, 53.2% were able to decrease their use of prescription opioids at  
5  
6 8 weeks. An additional study <sup>54</sup> included 600 patients with chronic pain who all were indicated  
7  
8 willingness to taper their opioid dose and were administered 0.5g daily of medicinal cannabis for  
9  
10 each 10% reduction in opioid dose. After 6 months' follow-up, 55% of patients reported a 30%  
11  
12 reduction in opioid dose on average and 26% of them discontinued opioid use.  
13  
14  
15  
16  
17  
18

### 19 **Pain relief**

20  
21 High-certainty evidence from 5 RCTs<sup>38-41</sup> demonstrated that adding medical cannabis to opioid  
22  
23 therapy resulted in trivial or no difference in pain (WMD -0.18 cm; 95%CI -0.38 to 0.02 on the  
24  
25 10 cm VAS for pain; MID 1cm; Table 2; Supplement Figure 4). Results did not differ depending  
26  
27 on loss to follow-up (Supplement Figure 5, a test of interaction  $P=0.44$ ).  
28  
29  
30  
31  
32

### 33 **Sleep disturbance**

34  
35 Five RCTs<sup>38-41</sup> provided high certainty evidence that adding medical cannabis to prescription  
36  
37 opioids results in a trivial improvement in sleep disturbance (WMD -0.22 cm; 95%CI -0.4 to -  
38  
39 0.06 on the 10 cm VAS for sleep disturbance; MID 1cm; Table 2; Supplement Figure 7). Results  
40  
41 did not differ between trials reporting the low and high loss to follow-up (Supplement Figure 8, a  
42  
43 test of interaction  $P=0.82$ ).  
44  
45  
46  
47  
48

### 49 **Other reported outcomes**

50  
51 A single RCT<sup>39</sup> reported moderate certainty evidence that adding cannabis likely has little or no  
52  
53 effect on emotional and physical functioning (Supplement Tables 8-9).  
54  
55  
56  
57  
58  
59  
60



## Adverse events

### *Nausea, vomiting, or constipation*

4 RCTs<sup>38-41</sup> provided moderate certainty evidence that adding medical cannabis to opioid therapy likely increases the incidence of nausea (RR 1.43, 95%CI 1.04 to 1.96; RD 4%, 95%CI 0% to 7%; Supplement Figure 9-10) and vomiting (RR 1.50; 95%CI 1.01 to 2.24; RD 3%; 95%CI 0% to 6%; Supplement Figure 11-12) in patients with cancer-related chronic pain prescribed opioid therapy. 3 RCTs<sup>38, 40, 41</sup> provided low certainty evidence that adding medical cannabis to opioid therapy may not increase constipation (RR 0.85, 95%CI 0.54 to 1.35; RD -1%; 95%CI -4% to 2%; Supplement Figure 13-14).

## DISCUSSION

Very-low certainty evidence from randomized trials and observational studies was conflicting and leaves uncertain whether the addition of medical cannabis affects the use of prescribed opioids among patients living with chronic pain. Compared with long-term opioid therapy for chronic pain without medical cannabis, high certainty evidence showed that adding medical cannabis did not reduce pain or sleep disturbance. Results provided moderate certainty evidence that adding cannabis therapy to opioids likely increases both nausea (RR 1.43, 95%CI 1.04 to 1.96) and vomiting (RR 1.50; 95%CI 1.01 to 2.24), and low certainty evidence suggested that it may have no effect on constipation (RR 0.85, 95%CI 0.54 to 1.35).

Strengths of our review include a comprehensive search for eligible randomized and observational studies, appraisal of the risk of bias among individual studies, and use of the GRADE approach to rate the certainty of evidence. Our review has limitations, primarily due to features of primary studies eligible for review. All eligible RCTs enrolled patients with chronic cancer-related pain, and the generalizability to non-cancer chronic pain is uncertain. Most observational studies incorporated inadequate adjustment for confounding, and all randomized trials, despite reporting this outcome, were not designed to address the effect of medical cannabis on opioid use.

A meta-analysis of pre-clinical studies,<sup>16</sup> a narrative systematic review,<sup>55</sup> and several cross-sectional and case studies have reported an apparent reduction in opioid use with addition of cannabis therapy.<sup>8, 9, 56-60</sup> In a national US population-based survey<sup>61</sup> of 2,774 cannabis users (both medical and non-medical use) 36% of respondents reported substituting cannabis for prescription opioids (discontinued opioid use). In this survey, 60% of participants who identified as medical cannabis users were much more likely to substitute cannabis for prescription drugs

1  
2  
3 than recreational users (OR 4.59; 95%CI 3.87 to 5.43). Another US survey<sup>62</sup> that included 841  
4 patients prescribed long-term opioid therapy for chronic pain reported that 61% used medical  
5 cannabis, and 97% of this subgroup reported coincident reduction of their opioid use.  
6  
7  
8  
9

10 Consistent with these findings, very low certainty evidence from observational studies in  
11 our review also suggests that adding medical cannabis allows patients with chronic pain to  
12 reduce their use of opioids. Although RCT results do not support reduction in opioid dose by  
13 adding medical cannabis for opioids, the evidence is also very low certainty, primarily because  
14 investigators instructed patients to maintain their current opioid dose. One could argue that this  
15 limitation makes the evidence irrelevant to the issue of opioid reduction with cannabis use.  
16 Results showed that, among patients with chronic cancer pain prescribed opioid therapy, the  
17 addition of medical cannabis does not result in important reductions in pain, and likely does not  
18 improve sleep quality.  
19  
20  
21  
22  
23  
24  
25  
26  
27  
28  
29  
30  
31  
32  
33  
34

### 35 **Conclusion**

36  
37 The opioid-sparing effects of medical cannabis for chronic pain remain uncertain. Based on  
38 moderate-to-high certainty evidence, adding medical cannabis to opioid therapy among chronic  
39 cancer pain patients influences neither pain relief nor sleep disturbance and increases the risk of  
40 nausea and vomiting. The accompanying BMJ Rapid Recommendation<sup>17</sup> provides contextualized  
41 guidance based on this evidence, as well as three other systematic reviews on benefits,<sup>63</sup> harms<sup>64</sup>  
42 and patients' values and preferences.<sup>65</sup>  
43  
44  
45  
46  
47  
48  
49  
50  
51  
52  
53  
54  
55  
56  
57  
58  
59  
60

1  
2  
3 **Disclosures/Conflicts of Interest:** All authors have no financial relationships with any  
4 organizations that might have an interest in the submitted work.  
5  
6

7 **Role of the Funding Source:** This review received no external funding or other support.  
8  
9

10 **Ethical approval:** ethical approval is not required because this study retrieved and synthesised  
11 data from already published studies.  
12  
13

14 **Data:** Details of the characteristics of the included studies were shared in the supplementary  
15 materials. Data will be made available upon publication and can be obtained from the  
16 corresponding author at [bussejw@mcmaster.ca](mailto:bussejw@mcmaster.ca).  
17  
18  
19

20 **Disclaimers:** None.  
21  
22

23 **Transparency:** All authors affirm that the manuscript is an honest, accurate, and transparent  
24 account of the study being reported; that no important aspects of the study have been omitted;  
25 and that any discrepancies from the study as planned (and, if relevant, registered) have been  
26 explained.  
27  
28  
29  
30  
31

32 **Patients and public involvement:** Patients and public were not involved in this research.  
33  
34

35 **Contribution:** JWB, AN, GG, conceived and designed the study. RC performed the literature  
36 search. AN, AM, YSh, VA, YR selected the studies, extracted the relevant information, and  
37 assessed the risk of bias of selected studies. AN synthesised the data. AN wrote the first draft of  
38 the paper. AN, JWB, GG, and TA critically revised the manuscript for important intellectual  
39 content. JWB, LT, GG, MB, and NB interpreted the findings. JWB, LT, and GG provided  
40 methodological support. All authors reviewed the paper and approved the final version. The  
41 corresponding author attests that all listed authors meet authorship criteria and that no others  
42 meeting the criteria have been omitted.  
43  
44  
45  
46  
47  
48  
49  
50  
51  
52  
53  
54  
55  
56  
57  
58  
59  
60

1  
2  
3  
4  
5  
6  
7  
8  
9  
10  
11  
12  
13  
14  
15  
16  
17  
18  
19  
20  
21  
22  
23  
24  
25  
26  
27  
28  
29  
30  
31  
32  
33  
34  
35  
36  
37  
38  
39  
40  
41  
42  
43  
44  
45  
46  
47  
48  
49  
50  
51  
52  
53  
54  
55  
56  
57  
58  
59  
60

Figure 1: Study selection process in review of opioid-sparing effects of cannabis in chronic pain

For peer review only

**Table 1: Characteristics of included studies (n=18)**

| Author-year (country)                                       | Study design                | Participants # (opioid user %)                    | Pain classification (specific condition)      | Age mean (SD)          | Female (%) | Opioid regimen (baseline dose in MME mean $\pm$ SD)                                      | FU duration             | Daily dose of medical cannabis                           | Co-intervention                                                 | Funding source                                               |
|-------------------------------------------------------------|-----------------------------|---------------------------------------------------|-----------------------------------------------|------------------------|------------|------------------------------------------------------------------------------------------|-------------------------|----------------------------------------------------------|-----------------------------------------------------------------|--------------------------------------------------------------|
| Bellnier et al-2018 (US) <sup>42</sup>                      | One-arm observational study | n= 29 (100%)                                      | 90% CNCP; 10% cancer pain                     | 61 (10)                | 65%        | Different opioids (79.94; ranged 0 to 450)                                               | 13 weeks                | 10mg capsules of THC/CBD in a 1:1 ratio 3-times daily    | NR                                                              | NR                                                           |
| Barlow et al-2019 (US) <sup>43</sup>                        | Retrospective chart-review  | Enrolled in MCP=34; not enrolled in MCP=19 (100%) | 100% CNCP (chronic painful pancreatitis)      | 49.9 (10.5)            | 45%        | Different opioids (not enrolled in MCP 183 $\pm$ 284; enrolled in MCP 190 $\pm$ 273)     | Ranged :34 to 297 weeks | NR                                                       | NR                                                              | NR                                                           |
| Capano et al-2020 (US) <sup>44</sup>                        | One-arm observational study | n= 131 (100%)                                     | Chronic pain (mixed of cancer and non-cancer) | 56.1 (range: 39 to 70) | 68%        | On a stable opioid for at least 1 year (defined as less than 10% change in its severity) | 8 weeks                 | 30mg CBD/1mg THC                                         | NR                                                              | Funded by Ananda Professional.                               |
| Fallon et al-2017-study I (multicenter trial) <sup>38</sup> | Parallel arm RCT            | n=399; Nabiximols=20 placebo=199 (100%)           | 100% chronic cancer pain                      | 59.8 (10.9)            | 43%        | On a stable maintenance opioid therapy with <500mg MME/day (Nabiximols: 199 $\pm$ 131;   | 5 weeks                 | THC 27 mg/mL; CBD 25 mg/mL (maximum allowed daily dosage | Patients allowed to take not more than one type of breakthrough | Otsuka Pharmaceutical Development & Commercialization, Inc., |

|                                                                                          |                                   |                                                            |                                            |                     |      |                                                                                                                          |             |                                                                                                                            |                                                                                                                                                                  |                                                                                                               |
|------------------------------------------------------------------------------------------|-----------------------------------|------------------------------------------------------------|--------------------------------------------|---------------------|------|--------------------------------------------------------------------------------------------------------------------------|-------------|----------------------------------------------------------------------------------------------------------------------------|------------------------------------------------------------------------------------------------------------------------------------------------------------------|---------------------------------------------------------------------------------------------------------------|
|                                                                                          |                                   |                                                            |                                            |                     |      | placebo:<br>207±135)                                                                                                     |             | of 10<br>sprays)                                                                                                           | medicati<br>ons/other<br>interventi<br>on that<br>could<br>affect<br>pain<br>were<br>restricted                                                                  | Rockville,<br>MD, USA                                                                                         |
| Fallon et al-<br>2017- study<br>II<br>(multicenter<br>trial <sup>f</sup> ) <sup>38</sup> | Parallel arm<br>RCT               | n=206;<br>Nabiximol<br>s=103,<br>placebo=1<br>03<br>(100%) | 100% chronic<br>cancer pain                | 61.5<br>(11.3)      | 49%  | Same as above<br>(Nabiximols:<br>212±136;<br>placebo:<br>209±121)                                                        | 5<br>weeks  | Same as<br>above.<br>Patients<br>with 15%<br>improveme<br>nt in pain<br>entered<br>into the<br>double-<br>blinded<br>phase | Same as<br>above                                                                                                                                                 | Otsuka<br>Pharmace<br>utical<br>Developm<br>ent &<br>Commerc<br>ialization,<br>Inc.,<br>Rockville,<br>MD, USA |
| Haroutounia<br>n et al-2016<br>(Israel) <sup>45</sup>                                    | One-arm<br>observational<br>study | n=73<br>(35%)                                              | 93.2% CNCP;<br>6.8% chronic<br>cancer pain | 51.2<br>(15.4)<br>‡ | 38%‡ | Oxycodone-<br>Paracetamol,<br>Morphine,<br>Methadone,<br>Buprenorphine<br>,<br>Fentanyl<br>(median 60;<br>ranged 45, 90) | 26<br>weeks | Cigarettes:<br>6% to 14%<br>THC,<br>0.2% to<br>3.8%<br>CBD;<br>Oral: 11%<br>to 19%<br>THC,<br>0.5% to<br>5.5% CBD          | On a<br>stable<br>medicati<br>on;<br>however,<br>patients<br>were<br>encourag<br>ed to<br>discontin<br>ue or<br>decrease<br>using of<br>other<br>pain<br>killers | No-<br>external<br>funding                                                                                    |
| Johnson et<br>al-2010<br>(multicenter<br>trial <sup>f</sup> ) <sup>39</sup>              | Parallel arm<br>RCT               | n=177;<br>THC: CBD<br>extract=<br>60, THC                  | 100% chronic<br>cancer pain                | 60.2<br>(12.3)      | 46%  | On a stable<br>maintenance<br>strong opioid<br>therapy                                                                   | 2<br>weeks  | One spray:<br>2.7mg<br>THC/2.5m<br>g CBD.                                                                                  | Intervent<br>ion that<br>could<br>affect                                                                                                                         | GW<br>Pharma<br>Ltd                                                                                           |

|                                                               |                             |                                                   |                          |                 |     |                                                                                                                                       |               |                                                                                                                            |                                                                                                                                        |                                                                                 |
|---------------------------------------------------------------|-----------------------------|---------------------------------------------------|--------------------------|-----------------|-----|---------------------------------------------------------------------------------------------------------------------------------------|---------------|----------------------------------------------------------------------------------------------------------------------------|----------------------------------------------------------------------------------------------------------------------------------------|---------------------------------------------------------------------------------|
|                                                               |                             | extract=58,<br>placebo=59<br>(100%)               |                          |                 |     | for at least<br>one-week<br>before<br>included into<br>the study<br>(THC:CBD:<br>258±789;<br>THC:<br>188±234;<br>placebo:<br>367±886) |               | The<br>maximum<br>permitted<br>dose:<br>8<br>actuations<br>in any 3-<br>hour and<br>48<br>actuations<br>in any 24-<br>hour | pain<br>within 2<br>weeks of<br>screening<br>were<br>restricted                                                                        |                                                                                 |
| Lichtman et al-2018 (multicenter <sup>f</sup> ) <sup>40</sup> | Parallel arm RCT            | n=398;<br>Nabiximol =199<br>Placebo=198<br>(100%) | 100% chronic cancer pain | 60 (11.5)       | 46% | On a stable maintenance opioid therapy with <500 MME/day (nabiximols: 193±130; placebo: 186±131)                                      | 5 weeks       | THC 27 mg/mL; CBD 25 mg/mL (maximum allowed daily dosage of 10 sprays per day)                                             | Patients allowed to take not more than one type of breakthrough medications/other interventions that could affect pain were restricted | Otsuka Pharmaceutical Development & Commercialization, Inc., Rockville, MD, USA |
| Maida et al-2008 (Canada) <sup>46</sup>                       | Prospective cohort          | Enrolled in MCP=47 not enrolled in MCP=65 (100%)  | 100% Chronic cancer pain | 69.7 (10.1)     | 42% | Different opioids (nabilone treated:60±64; untreated: 67±101)                                                                         | 4 weeks       | On average 1.79 mg twice daily nabilone                                                                                    | Patients were permitted to use concomitant medications                                                                                 | Valeant Pharmaceuticals Canada Ltd                                              |
| Narang et al-2008 (US) <sup>47</sup>                          | One-arm observational study | n=30 (100%)                                       | 100% CNCP                | Median=4<br>3.5 | 53% | Methadone, Morphine, Oxycodone,                                                                                                       | Phase 2: open | Flexible dose schedule,                                                                                                    | NR                                                                                                                                     | Solvay Pharmaceuticals,                                                         |



|                                                   |                             |                                                                                |                              |                    |     |                                                                                                   |                                                             |                                                                                |                                                        |                                            |
|---------------------------------------------------|-----------------------------|--------------------------------------------------------------------------------|------------------------------|--------------------|-----|---------------------------------------------------------------------------------------------------|-------------------------------------------------------------|--------------------------------------------------------------------------------|--------------------------------------------------------|--------------------------------------------|
|                                                   |                             |                                                                                |                              | (range=21-67)      |     | Hydrocodone, Hydromorphone (68±57)                                                                | label for 4 weeks.                                          | dronabinol 5mg to 20mg 3 times daily                                           |                                                        | Inc.                                       |
| O'Connell et al-2019 (US) <sup>48</sup>           | One-arm observational study | n=77 (100%)                                                                    | 100% CNCP (mixed conditions) | 54.1 (range=26-76) | 58% | Different opioids (140±184)                                                                       | 26 weeks                                                    | NR                                                                             | Patients were permitted to use concomitant medications | No-industry funding                        |
| Portenoy et al-2012 (multicenter £) <sup>41</sup> | Parallel arm RCT            | n=360; nabiximols low-dose=91, medium-dose=88, high-dose=90, placebo=91 (100%) | 100% chronic cancer pain     | 58 (12.2)          | 48% | On a stable maintenance opioid therapy with <500 MME/day (median MME of 120 mg ranged 3 to 16660) | 5 weeks                                                     | THC 27 mg/mL; CBD 25 mg/mL (maximum allowed daily dosage of 10 sprays per day) | Concomitant use of medications was restricted          | Supported by GW Pharmaceuticals and Otsuka |
| Pritchard-2020 (US) <sup>49</sup>                 | Retrospective cohort        | cannabis and opioids co-use=22 Opioids only=61 (100%)                          | 100% chronic cancer pain     | 53.1 (11.7)        | 23% | Different opioids (MCP enrolled=144±129; MCP not enrolled=119±100)                                | 26 weeks                                                    | NR                                                                             | NR                                                     | No-industry funding                        |
| Pawasarat-2020 (US) <sup>50</sup>                 | Retrospective chart review  | Enrolled in MCP=137, not enrolled in MCP=95 (100%)                             | 100% chronic cancer pain     | 58 (IQR: 14.7)     | 56% | Different opioids (MCP enrolled=median 45 IQR=135; MCP not enrolled=97,150)                       | Between 39 and 52 weeks for MCP enrolled; <26 weeks for not | NR                                                                             | NR                                                     | No-industry funding                        |

|    |                                              |                                   |                                                         |                                                 |                |     |                                                                                                                                       |                                                                                              |                                                                                                             |                                                                                                                                                                                               |                                                                                                                |
|----|----------------------------------------------|-----------------------------------|---------------------------------------------------------|-------------------------------------------------|----------------|-----|---------------------------------------------------------------------------------------------------------------------------------------|----------------------------------------------------------------------------------------------|-------------------------------------------------------------------------------------------------------------|-----------------------------------------------------------------------------------------------------------------------------------------------------------------------------------------------|----------------------------------------------------------------------------------------------------------------|
| 1  |                                              |                                   |                                                         |                                                 |                |     |                                                                                                                                       |                                                                                              |                                                                                                             |                                                                                                                                                                                               |                                                                                                                |
| 2  |                                              |                                   |                                                         |                                                 |                |     |                                                                                                                                       |                                                                                              |                                                                                                             |                                                                                                                                                                                               |                                                                                                                |
| 3  |                                              |                                   |                                                         |                                                 |                |     | enrolle                                                                                                                               |                                                                                              |                                                                                                             |                                                                                                                                                                                               |                                                                                                                |
| 4  |                                              |                                   |                                                         |                                                 |                |     | d                                                                                                                                     |                                                                                              |                                                                                                             |                                                                                                                                                                                               |                                                                                                                |
| 5  | Rod-2019<br>(Canada) <sup>54</sup>           | One-arm<br>observational<br>study | n=600                                                   | Chronic pain<br>(not specified<br>type of pain) | NR             | NR  | Different<br>opioids<br>ranging from<br>90 to 240mg<br>MME<br>(average<br>120mg MME)                                                  | 6<br>months                                                                                  | CBD and<br>THC<br>ranged<br>between<br>4% to 6%.<br>Doses<br>related<br>directly to<br>the opioid<br>taper. | All<br>participa<br>nts<br>indicated<br>ready to<br>reduce<br>opioid<br>dose and<br>also<br>received<br>psycholo<br>gical<br>supports<br>(e.g.<br>CBT,<br>mindful<br>ness,<br>relaxatio<br>n) | No-<br>external<br>funding                                                                                     |
| 6  |                                              |                                   |                                                         |                                                 |                |     |                                                                                                                                       |                                                                                              |                                                                                                             |                                                                                                                                                                                               |                                                                                                                |
| 7  |                                              |                                   |                                                         |                                                 |                |     |                                                                                                                                       |                                                                                              |                                                                                                             |                                                                                                                                                                                               |                                                                                                                |
| 8  |                                              |                                   |                                                         |                                                 |                |     |                                                                                                                                       |                                                                                              |                                                                                                             |                                                                                                                                                                                               |                                                                                                                |
| 9  |                                              |                                   |                                                         |                                                 |                |     |                                                                                                                                       |                                                                                              |                                                                                                             |                                                                                                                                                                                               |                                                                                                                |
| 10 |                                              |                                   |                                                         |                                                 |                |     |                                                                                                                                       |                                                                                              |                                                                                                             |                                                                                                                                                                                               |                                                                                                                |
| 11 |                                              |                                   |                                                         |                                                 |                |     |                                                                                                                                       |                                                                                              |                                                                                                             |                                                                                                                                                                                               |                                                                                                                |
| 12 |                                              |                                   |                                                         |                                                 |                |     |                                                                                                                                       |                                                                                              |                                                                                                             |                                                                                                                                                                                               |                                                                                                                |
| 13 |                                              |                                   |                                                         |                                                 |                |     |                                                                                                                                       |                                                                                              |                                                                                                             |                                                                                                                                                                                               |                                                                                                                |
| 14 |                                              |                                   |                                                         |                                                 |                |     |                                                                                                                                       |                                                                                              |                                                                                                             |                                                                                                                                                                                               |                                                                                                                |
| 15 |                                              |                                   |                                                         |                                                 |                |     |                                                                                                                                       |                                                                                              |                                                                                                             |                                                                                                                                                                                               |                                                                                                                |
| 16 |                                              |                                   |                                                         |                                                 |                |     |                                                                                                                                       |                                                                                              |                                                                                                             |                                                                                                                                                                                               |                                                                                                                |
| 17 |                                              |                                   |                                                         |                                                 |                |     |                                                                                                                                       |                                                                                              |                                                                                                             |                                                                                                                                                                                               |                                                                                                                |
| 18 |                                              |                                   |                                                         |                                                 |                |     |                                                                                                                                       |                                                                                              |                                                                                                             |                                                                                                                                                                                               |                                                                                                                |
| 19 |                                              |                                   |                                                         |                                                 |                |     |                                                                                                                                       |                                                                                              |                                                                                                             |                                                                                                                                                                                               |                                                                                                                |
| 20 |                                              |                                   |                                                         |                                                 |                |     |                                                                                                                                       |                                                                                              |                                                                                                             |                                                                                                                                                                                               |                                                                                                                |
| 21 |                                              |                                   |                                                         |                                                 |                |     |                                                                                                                                       |                                                                                              |                                                                                                             |                                                                                                                                                                                               |                                                                                                                |
| 22 |                                              |                                   |                                                         |                                                 |                |     |                                                                                                                                       |                                                                                              |                                                                                                             |                                                                                                                                                                                               |                                                                                                                |
| 23 |                                              |                                   |                                                         |                                                 |                |     |                                                                                                                                       |                                                                                              |                                                                                                             |                                                                                                                                                                                               |                                                                                                                |
| 24 | Takakuwa et<br>al-2020<br>(US) <sup>51</sup> | One-arm<br>observational<br>study | n=61<br>(100%)                                          | 100% CNCP<br>(back pain)                        | 50<br>(11.4)   | 38% | Different<br>opioids<br>divided into<br>intermittent<br>users and short<br>intermittent<br>users<br>(median 21<br>ranged 1.1,<br>500) | Median<br>of 6.4<br>years<br>among<br>patients<br>who<br>ceased<br>opioids<br>comple<br>tely | NR                                                                                                          | NR                                                                                                                                                                                            | The<br>Society of<br>Cannabis<br>Clinicians<br>paid for<br>the IRB<br>review<br>and<br>statistical<br>analysis |
| 25 |                                              |                                   |                                                         |                                                 |                |     |                                                                                                                                       |                                                                                              |                                                                                                             |                                                                                                                                                                                               |                                                                                                                |
| 26 |                                              |                                   |                                                         |                                                 |                |     |                                                                                                                                       |                                                                                              |                                                                                                             |                                                                                                                                                                                               |                                                                                                                |
| 27 |                                              |                                   |                                                         |                                                 |                |     |                                                                                                                                       |                                                                                              |                                                                                                             |                                                                                                                                                                                               |                                                                                                                |
| 28 |                                              |                                   |                                                         |                                                 |                |     |                                                                                                                                       |                                                                                              |                                                                                                             |                                                                                                                                                                                               |                                                                                                                |
| 29 |                                              |                                   |                                                         |                                                 |                |     |                                                                                                                                       |                                                                                              |                                                                                                             |                                                                                                                                                                                               |                                                                                                                |
| 30 |                                              |                                   |                                                         |                                                 |                |     |                                                                                                                                       |                                                                                              |                                                                                                             |                                                                                                                                                                                               |                                                                                                                |
| 31 |                                              |                                   |                                                         |                                                 |                |     |                                                                                                                                       |                                                                                              |                                                                                                             |                                                                                                                                                                                               |                                                                                                                |
| 32 |                                              |                                   |                                                         |                                                 |                |     |                                                                                                                                       |                                                                                              |                                                                                                             |                                                                                                                                                                                               |                                                                                                                |
| 33 |                                              |                                   |                                                         |                                                 |                |     |                                                                                                                                       |                                                                                              |                                                                                                             |                                                                                                                                                                                               |                                                                                                                |
| 34 | Vigil et al-<br>2017<br>(US) <sup>52</sup>   | Retrospectiv<br>e chart<br>review | Enrolled in<br>MCP*=37<br>not<br>enrolled=2<br>9 (100%) | 100% CNCP                                       | 56.3<br>(11.8) | 36% | Different<br>opioids with<br>maximum<br>daily dosages<br>of less than<br>200<br>(enrolled in<br>MCP: 24±23;                           | 52<br>weeks                                                                                  | Varied in<br>individuals<br>based on<br>their<br>selection                                                  | NR                                                                                                                                                                                            | the<br>Universit<br>y of New<br>Mexico<br>Medical<br>Cannabis<br>Research<br>Fund                              |
| 35 |                                              |                                   |                                                         |                                                 |                |     |                                                                                                                                       |                                                                                              |                                                                                                             |                                                                                                                                                                                               |                                                                                                                |
| 36 |                                              |                                   |                                                         |                                                 |                |     |                                                                                                                                       |                                                                                              |                                                                                                             |                                                                                                                                                                                               |                                                                                                                |
| 37 |                                              |                                   |                                                         |                                                 |                |     |                                                                                                                                       |                                                                                              |                                                                                                             |                                                                                                                                                                                               |                                                                                                                |
| 38 |                                              |                                   |                                                         |                                                 |                |     |                                                                                                                                       |                                                                                              |                                                                                                             |                                                                                                                                                                                               |                                                                                                                |
| 39 |                                              |                                   |                                                         |                                                 |                |     |                                                                                                                                       |                                                                                              |                                                                                                             |                                                                                                                                                                                               |                                                                                                                |
| 40 |                                              |                                   |                                                         |                                                 |                |     |                                                                                                                                       |                                                                                              |                                                                                                             |                                                                                                                                                                                               |                                                                                                                |
| 41 |                                              |                                   |                                                         |                                                 |                |     |                                                                                                                                       |                                                                                              |                                                                                                             |                                                                                                                                                                                               |                                                                                                                |
| 42 |                                              |                                   |                                                         |                                                 |                |     |                                                                                                                                       |                                                                                              |                                                                                                             |                                                                                                                                                                                               |                                                                                                                |
| 43 |                                              |                                   |                                                         |                                                 |                |     |                                                                                                                                       |                                                                                              |                                                                                                             |                                                                                                                                                                                               |                                                                                                                |
| 44 |                                              |                                   |                                                         |                                                 |                |     |                                                                                                                                       |                                                                                              |                                                                                                             |                                                                                                                                                                                               |                                                                                                                |
| 45 |                                              |                                   |                                                         |                                                 |                |     |                                                                                                                                       |                                                                                              |                                                                                                             |                                                                                                                                                                                               |                                                                                                                |
| 46 |                                              |                                   |                                                         |                                                 |                |     |                                                                                                                                       |                                                                                              |                                                                                                             |                                                                                                                                                                                               |                                                                                                                |
| 47 |                                              |                                   |                                                         |                                                 |                |     |                                                                                                                                       |                                                                                              |                                                                                                             |                                                                                                                                                                                               |                                                                                                                |

1  
2  
3  
4  
5  
6  
7  
8  
9  
10  
11  
12  
13  
14  
15  
16  
17  
18  
19  
20  
21  
22  
23  
24  
25  
26  
27  
28  
29  
30  
31  
32  
33  
34  
35  
36  
37  
38  
39  
40  
41  
42  
43  
44  
45  
46  
47

|                                                 |                                   |                |                             |                |     |                                                          |             |                                                                                                                                    |                                                                                                    |    |  |
|-------------------------------------------------|-----------------------------------|----------------|-----------------------------|----------------|-----|----------------------------------------------------------|-------------|------------------------------------------------------------------------------------------------------------------------------------|----------------------------------------------------------------------------------------------------|----|--|
|                                                 |                                   |                |                             |                |     | not enrolled:<br>16±14)                                  |             |                                                                                                                                    |                                                                                                    |    |  |
| Yassin et al-<br>2019<br>(Israel) <sup>53</sup> | One-arm<br>observational<br>study | n=31<br>(100%) | 100% CNCP<br>(fibromyalgia) | 33.4<br>(12.3) | 90% | Oxycodone 5<br>mg three<br>times/daily<br>(not reported) | 26<br>weeks | THC<br>to CBD<br>ratio: 1/4,<br>20<br>g/month<br>for 3<br>months,<br>increased<br>up to 30<br>g/month at<br>the end of<br>6 months | Patients<br>were<br>allowed<br>to use<br>concomit<br>ant pain<br>therapy<br>in a<br>stable<br>dose | NR |  |

\*CNCP: Chronic non-cancer pain; MCP: Medical Cannabis Program; MME: milligram morphine equivalent; FU: follow-up; NR: not reported

‡ Based on the whole population including opioid users and non-users

§ In Belgium, Bulgaria, Czech Republic, Estonia, Germany, Hungary, Latvia, Lithuania, Poland, Romania, the United Kingdom and the United States

**Table 2: GRADE Evidence Profile of cannabis for patients with chronic pain prescribed long-term opioid therapy**

| # of studies                                                                              | # of Patients | FU Duration (Weeks) | Risk of bias <sup>a</sup>            | Inconsistency (I <sup>2</sup> , P-value) <sup>b</sup> | Indirectness <sup>c</sup>              | Imprecision <sup>d</sup>         | Publication bias | Treatment association (95% CI) | Overall certainty of evidence |
|-------------------------------------------------------------------------------------------|---------------|---------------------|--------------------------------------|-------------------------------------------------------|----------------------------------------|----------------------------------|------------------|--------------------------------|-------------------------------|
| <b>Opioid dose reduction: morphine milligram equivalents (MME) per day</b>                |               |                     |                                      |                                                       |                                        |                                  |                  |                                |                               |
| 4 RCT <sup>s</sup> <sup>38-40</sup>                                                       | 1,176         | 2 to 5              | No serious risk of bias <sup>e</sup> | No serious inconsistency [40.4%, P=0.15]              | Very serious indirectness <sup>f</sup> | Serious imprecision <sup>g</sup> | Not detected     | WMD -3.4MME (-12.7 to 5.9)     | Very Low                      |
| 8 Observational studies <sup>42, 43, 45, 46, 48-50, 52</sup>                              | 453           | 4 to 297            | Serious risk of bias <sup>h</sup>    | Serious inconsistency [visual inspection]             | No serious indirectness                | No serious imprecision           | Not detected     | WMD -22.5MME (-43.06 to -1.97) | Very low                      |
| <b>Pain: 10 cm VAS for pain; lower is better; the MID = 1 cm</b>                          |               |                     |                                      |                                                       |                                        |                                  |                  |                                |                               |
| 5 RCT <sup>s</sup> <sup>38-41</sup>                                                       | 1,536         | 2 to 5              | No serious risk of bias <sup>e</sup> | No serious inconsistency [28%, P=0.20]                | No serious indirectness                | No serious imprecision           | Not detected     | WMD -0.18 (-0.38 to 0.02)      | High                          |
| <b>Sleep disturbance: 10 cm VAS for sleep disturbance; lower is better; the MID= 1 cm</b> |               |                     |                                      |                                                       |                                        |                                  |                  |                                |                               |
| 5 RCT <sup>s</sup> <sup>38-41</sup>                                                       | 1,536         | 2 to 5              | No serious risk of bias <sup>e</sup> | No serious inconsistency [0%, P=0.45]                 | No serious indirectness                | No serious imprecision           | Not detected     | WMD -0.22 (-0.39 to -0.06)     | High                          |
| <b>Nausea</b>                                                                             |               |                     |                                      |                                                       |                                        |                                  |                  |                                |                               |
| 4 RCT <sup>s</sup> <sup>*38-41</sup>                                                      | 1330          | 2 to 5              | Serious risk of bias <sup>i</sup>    | No serious inconsistency [0%, P=0.88]                 | No serious indirectness                | No serious imprecision           | Not detected     | RR 1.43 (1.04 to 1.96)         | Moderate                      |
| <b>Vomiting</b>                                                                           |               |                     |                                      |                                                       |                                        |                                  |                  |                                |                               |
| 4 RCT <sup>s</sup> <sup>*38-41</sup>                                                      | 1330          | 2 to 5              | Serious risk of bias <sup>i</sup>    | No serious inconsistency [0%, P=0.50]                 | No serious indirectness                | No serious imprecision           | Not detected     | RR 1.5 (1.01 to 2.24)          | Moderate                      |

| Constipation                  |      |   |                                   |                                               |                         |                                  |              |                        |     |
|-------------------------------|------|---|-----------------------------------|-----------------------------------------------|-------------------------|----------------------------------|--------------|------------------------|-----|
| 3 RCTs* <sup>38, 40, 41</sup> | 1153 | 5 | Serious risk of bias <sup>i</sup> | No serious inconsistency [0%, <i>P</i> =0.92] | No serious indirectness | Serious imprecision <sup>g</sup> | Not detected | RR 0.85 (0.54 to 1.35) | Low |

WMD: weighted mean difference; RR: relative risk; 95% CI: 95% confidence interval; VAS: visual analogue scale; MID: minimally important difference; FU: follow-up

<sup>a</sup> We assessed risk of bias using a modified Cochrane risk of bias instrument;

<sup>b</sup> Inconsistency refers to unexplained heterogeneity of results. For RCTs an  $I^2$  of 75-100% indicates that heterogeneity may be considerable. We assessed heterogeneity of pooled observational studies through visual inspection of forest plots.

<sup>c</sup> Indirectness results if the intervention, control, patients or outcomes are different from the research question under investigation.

<sup>d</sup> Serious imprecision refers to situations in which the confidence interval includes both benefit and harm (the 95%CI includes 1 MID).

<sup>e</sup> Some of the included RCTs were at high risk of bias, due to loss to follow-up (>20%); however, we did not rate down for risk of bias as subgroup analysis showed no difference in treatment effect between trials at high and low risk of bias for missing outcome data (test of interaction  $p=0.791$ ).

<sup>f</sup> downgraded twice due to indirectness since all trials instructed participants to maintain their opioid dose during the study period.

<sup>g</sup> The 95%CI around the WMD includes no effect.

<sup>h</sup> Studies are based on non-representative samples.

<sup>i</sup> Most of the included RCTs were at high risk of bias due to loss to follow-up (>20%).

\*Fallon et al-2017 (the results of two separate RCTs reported in this publication): only study number 1 reported these outcomes and subsequently included in the meta-analysis.

**References:**

1. Schopflocher D, Taenzer P, Jovey R. The prevalence of chronic pain in Canada. *Pain Res Manag* 2011;16(6):445-50. doi:10.1155/2011/876306.
2. Schappert SM, Burt CW. Ambulatory care visits to physician offices, hospital outpatient departments, and emergency departments: United States, 2001-02. *Vital and Health Statistics Series 13, Data from the National Health Survey* 2006(159):1-66.
3. International Narcotics Control Board. Narcotic drugs: estimated world requirements for 2019: [https://www.incb.org/documents/Narcotic-Drugs/Technical-Publications/2018/INCB-Narcotics\\_Drugs\\_Technical\\_Publication\\_2018.pdf](https://www.incb.org/documents/Narcotic-Drugs/Technical-Publications/2018/INCB-Narcotics_Drugs_Technical_Publication_2018.pdf) (Accessed: 02 Nov 2020). Vienna: United Nations.
4. Gomes T, Greaves S, Martins D, et al. Latest Trends in Opioid-Related Deaths in Ontario: 1991 to 2015. Toronto: Ontario Drug Policy Research Network; 2017.
5. Busse JW, Craigie S, Juurlink DN, et al. Guideline for opioid therapy and chronic noncancer pain. *CMAJ* 2017;189(18):E659-e66. doi:10.1503/cmaj.170363.
6. Gomes T, Mamdani MM, Paterson JM, Dhalla IA, Juurlink DN. Trends in high-dose opioid prescribing in Canada. *Can Fam Physician* 2014;60(9):826-32.
7. Bedson J, Chen Y, Ashworth J, et al. Risk of adverse events in patients prescribed long-term opioids: A cohort study in the UK Clinical Practice Research Datalink. *Eur J Pain* 2019;23(5):908-22. doi:10.1002/ejp.1357.
8. Gwira Baumblatt JA, Wiedeman C, Dunn JR, et al. High-risk use by patients prescribed opioids for pain and its role in overdose deaths. *JAMA Intern Med* 2014;174(5):796-801. doi:10.1001/jamainternmed.2013.12711.

- 1  
2  
3 9. Bohnert AS, Logan JE, Ganoczy D, Dowell D. A Detailed Exploration Into the  
4 Association of Prescribed Opioid Dosage and Overdose Deaths Among Patients With Chronic  
5 Pain. *Med Care* 2016;54(5):435-41. doi:10.1097/mlr.0000000000000505.  
6  
7
- 8  
9  
10 10. Attal N, Mazaltarine G, Perrouin-Verbe B, Albert T. Chronic neuropathic pain  
11 management in spinal cord injury patients. What is the efficacy of pharmacological treatments  
12 with a general mode of administration? (oral, transdermal, intravenous). *Ann Phys Rehabil Med*  
13 2009;52(2):124-41. doi:10.1016/j.rehab.2008.12.011.  
14  
15
- 16  
17 11. Livingston MD, Barnett TE, Delcher C, Wagenaar AC. Recreational Cannabis  
18 Legalization and Opioid-Related Deaths in Colorado, 2000-2015. *Am J Public Health*  
19 2017;107(11):1827-9. doi:10.2105/ajph.2017.304059.  
20  
21
- 22  
23 12. Bradford AC, Bradford WD. Medical Marijuana Laws Reduce Prescription Medication  
24 Use In Medicare Part D. *Health Aff (Millwood)* 2016;35(7):1230-6.  
25  
26  
27  
28  
29  
30  
31  
32  
33  
34  
35  
36  
37  
38  
39  
40  
41  
42  
43  
44  
45  
46  
47  
48  
49  
50  
51  
52  
53  
54  
55  
56  
57  
58  
59  
60  
doi:10.1377/hlthaff.2015.1661.
13. Bachhuber MA, Saloner B, Cunningham CO, Barry CL. Medical cannabis laws and  
opioid analgesic overdose mortality in the United States, 1999-2010. *JAMA Intern Med*  
2014;174(10):1668-73. doi:10.1001/jamainternmed.2014.4005.
14. Boehnke KF, Litinas E, Clauw DJ. Medical Cannabis Use Is Associated With Decreased  
Opiate Medication Use in a Retrospective Cross-Sectional Survey of Patients With Chronic Pain.  
*J Pain* 2016;17(6):739-44. doi:10.1016/j.jpain.2016.03.002.
15. Piper BJ, DeKeuster RM, Beals ML, et al. Substitution of medical cannabis for  
pharmaceutical agents for pain, anxiety, and sleep. *J Psychopharmacol* 2017;31(5):569-75.  
doi:10.1177/0269881117699616.

- 1  
2  
3 16. Nielsen S, Sabioni P, Trigo JM, et al. Opioid-Sparing Effect of Cannabinoids: A  
4 Systematic Review and Meta-Analysis. *Neuropsychopharmacology* 2017;42(9):1752-65.  
5  
6 doi:10.1038/npp.2017.51.  
7  
8  
9  
10 17. Busse JW, Vankrunkelsven P, Zeng L, et al. Medical cannabis for chronic pain: a clinical  
11 practice guideline. *BMJ* 2020(submitted).  
12  
13  
14 18. Stroup DF, Berlin JA, Morton SC, et al. Meta-analysis of observational studies in  
15 epidemiology: a proposal for reporting. Meta-analysis Of Observational Studies in Epidemiology  
16 (MOOSE) group. *JAMA* 2000;283(15):2008-12. doi:10.1001/jama.283.15.2008.  
17  
18  
19 19. Liberati A, Altman DG, Tetzlaff J, et al. The PRISMA statement for reporting systematic  
20 reviews and meta-analyses of studies that evaluate healthcare interventions: explanation and  
21 elaboration. *BMJ* 2009;339:b2700. doi:10.1136/bmj.b2700.  
22  
23  
24 20. Classification of chronic pain. Descriptions of chronic pain syndromes and definitions of  
25 pain terms. Prepared by the International Association for the Study of Pain, Subcommittee on  
26 Taxonomy. *Pain Suppl* 1986;3:S1-226.  
27  
28  
29 21. Reeves BC, Deeks JJ, Higgins JPT, et al. Chapter 24: Including non-randomized studies  
30 on intervention effects. . In: Higgins JPT TJ, Chandler J, Cumpston M, Li T, Page MJ, Welch  
31 VA (editors). editor: *Cochrane Handbook for Systematic Reviews of Interventions* version 6.1.  
32 Available from [www.training.cochrane.org/handbook](http://www.training.cochrane.org/handbook); 2020.  
33  
34  
35 22. Dworkin RH, Turk DC, Farrar JT, et al. Core outcome measures for chronic pain clinical  
36 trials: IMMPACT recommendations. *Pain* 2005;113(1-2):9-19. doi:10.1016/j.pain.2004.09.012.  
37  
38  
39 23. Goshua A, Craigie S, Guyatt GH, et al. Patient Values and Preferences Regarding  
40 Opioids for Chronic Noncancer Pain: A Systematic Review. *Pain Med* 2018;19(12):2469-80.  
41  
42  
43  
44  
45  
46  
47  
48  
49  
50  
51  
52  
53  
54  
55  
56  
57  
58  
59  
60



- 1  
2  
3 24. Akl EA, Sun X, Busse JW, et al. Specific instructions for estimating unclearly reported  
4 blinding status in randomized trials were reliable and valid. *J Clin Epidemiol* 2012;65(3):262-7.  
5  
6 doi:10.1016/j.jclinepi.2011.04.015.  
7  
8  
9  
10 25. Higgins JP, Altman DG, Gøtzsche PC, et al. The Cochrane Collaboration's tool for  
11 assessing risk of bias in randomised trials. *BMJ* 2011;343:d5928. doi:10.1136/bmj.d5928.  
12  
13  
14 26. Tool to Assess Risk of Bias. CLARITY Group at McMaster University. Access  
15 [www.evidencepartners.com/resources/methodological-resources/](http://www.evidencepartners.com/resources/methodological-resources/): Evidence partner; 2020 [  
16  
17  
18  
19 27. Landis JR, Koch GG. The measurement of observer agreement for categorical data.  
20 *Biometrics* 1977;33(1):159-74.  
21  
22  
23 28. Farrar JT, Young JP, Jr., LaMoreaux L, Werth JL, Poole RM. Clinical importance of  
24 changes in chronic pain intensity measured on an 11-point numerical pain rating scale. *Pain*  
25  
26 2001;94(2):149-58. doi:10.1016/s0304-3959(01)00349-9.  
27  
28  
29 29. Zisapel N, Nir T. Determination of the minimal clinically significant difference on a  
30 patient visual analog sleep quality scale. *J Sleep Res* 2003;12(4):291-8. doi:10.1046/j.0962-  
31  
32 1105.2003.00365.x.  
33  
34  
35 30. DerSimonian R, Laird N. Meta-analysis in clinical trials. *Control Clin Trials*  
36  
37 1986;7(3):177-88. doi:10.1016/0197-2456(86)90046-2.  
38  
39  
40 31. Wan X, Wang W, Liu J, Tong T. Estimating the sample mean and standard deviation  
41 from the sample size, median, range and/or interquartile range. *BMC Med Res Methodol*  
42  
43 2014;14:135. doi:10.1186/1471-2288-14-135.  
44  
45  
46 32. Ma J, Liu W, Hunter A, Zhang W. Performing meta-analysis with incomplete statistical  
47 information in clinical trials. *BMC Med Res Methodol* 2008;8:56. doi:10.1186/1471-2288-8-56.  
48  
49  
50  
51  
52  
53  
54  
55  
56  
57  
58  
59  
60

- 1  
2  
3 33. Rücker G, Cates CJ, Schwarzer G. Methods for including information from multi-arm  
4 trials in pairwise meta-analysis. *Res Synth Methods* 2017;8(4):392-403. doi:10.1002/jrsm.1259.  
5  
6  
7 34. Rücker G, Schwarzer G, Carpenter JR, Schumacher M. Undue reliance on I(2) in  
8 assessing heterogeneity may mislead. *BMC Med Res Methodol* 2008;8:79. doi:10.1186/1471-  
9 2288-8-79.  
10  
11  
12 35. Guyatt GH, Oxman AD, Vist GE, et al. GRADE: an emerging consensus on rating  
13 quality of evidence and strength of recommendations. *BMJ* 2008;336(7650):924-6.  
14  
15  
16  
17  
18  
19  
20  
21  
22 36. Guyatt GH, Oxman AD, Sultan S, et al. GRADE guidelines: 9. Rating up the quality of  
23 evidence. *J Clin Epidemiol* 2011;64(12):1311-6. doi:10.1016/j.jclinepi.2011.06.004.  
24  
25  
26 37. Egger M, Davey Smith G, Schneider M, Minder C. Bias in meta-analysis detected by a  
27 simple, graphical test. *BMJ* 1997;315(7109):629-34. doi:10.1136/bmj.315.7109.629.  
28  
29  
30 38. Fallon MT, Albert Lux E, McQuade R, et al. Sativex oromucosal spray as adjunctive  
31 therapy in advanced cancer patients with chronic pain unalleviated by optimized opioid therapy:  
32 two double-blind, randomized, placebo-controlled phase 3 studies. *Br J Pain* 2017;11(3):119-33.  
33  
34  
35  
36  
37  
38  
39  
40 39. Johnson JR, Burnell-Nugent M, Lossignol D, et al. Multicenter, double-blind,  
41 randomized, placebo-controlled, parallel-group study of the efficacy, safety, and tolerability of  
42 THC:CBD extract and THC extract in patients with intractable cancer-related pain. *J Pain*  
43  
44  
45  
46  
47  
48  
49 40. Lichtman AH, Lux EA, McQuade R, et al. Results of a Double-Blind, Randomized,  
50  
51  
52  
53  
54  
55  
56  
57  
58  
59  
60

1  
2  
3 Advanced Cancer Patients with Chronic Uncontrolled Pain. *J Pain Symptom Manage*

4  
5 2018;55(2):179-88.e1. doi:10.1016/j.jpainsymman.2017.09.001.

6  
7  
8 41. Portenoy RK, Ganae-Motan ED, Allende S, et al. Nabiximols for opioid-treated cancer  
9 patients with poorly-controlled chronic pain: a randomized, placebo-controlled, graded-dose  
10 trial. *J Pain* 2012;13(5):438-49. doi:10.1016/j.jpain.2012.01.003.

11  
12  
13  
14 42. Bellnier T, Brown GW. Preliminary evaluation of the efficacy, safety, and costs  
15 associated with the treatment of chronic pain with medical cannabis. *Ment Health Clin*  
16 2018;8(3):110-5. doi:10.9740/mhc.2018.05.110.

17  
18  
19  
20 43. Barlowe TS, Koliani-Pace JL, Smith KD, Gordon SR, Gardner TB. Effects of Medical  
21 Cannabis on Use of Opioids and Hospital Visits by Patients With Painful Chronic Pancreatitis.  
22  
23  
24  
25  
26  
27 *Clin Gastroenterol Hepatol* 2019;17(12):2608-9.e1. doi:10.1016/j.cgh.2019.01.018.

28  
29 44. Capano A, Weaver R, Burkman E. Evaluation of the effects of CBD hemp extract on  
30 opioid use and quality of life indicators in chronic pain patients: a prospective cohort study.  
31  
32  
33  
34  
35  
36  
37  
38  
39  
40  
41  
42  
43  
44  
45  
46  
47  
48  
49  
50  
51  
52  
53  
54  
55  
56  
57  
58  
59  
60  
*Postgrad Med* 2020;132(1):56-61. doi:10.1080/00325481.2019.1685298.

45. Haroutounian S, Ratz Y, Ginosar Y, et al. The Effect of Medicinal Cannabis on Pain and  
Quality-of-Life Outcomes in Chronic Pain: A Prospective Open-label Study. *Clin J Pain*  
2016;32(12):1036-43. doi:10.1097/ajp.0000000000000364.

46. Maida V, Ennis M, Irani S, Corbo M, Dolzhykov M. Adjunctive nabilone in cancer pain  
and symptom management: a prospective observational study using propensity scoring. *J*  
*Support Oncol* 2008;6(3):119-24.

47. Narang S, Gibson D, Wasan AD, et al. Efficacy of dronabinol as an adjuvant treatment  
for chronic pain patients on opioid therapy. *J Pain* 2008;9(3):254-64.  
doi:10.1016/j.jpain.2007.10.018.

- 1  
2  
3 48. O'Connell M, Sandgren M, Frantzen L, Bower E, Erickson B. Medical Cannabis: Effects  
4 on Opioid and Benzodiazepine Requirements for Pain Control. *Ann Pharmacother*  
5  
6 2019;53(11):1081-6. doi:10.1177/1060028019854221.  
7  
8  
9  
10 49. Pritchard ER, Dayer L, Belz J, et al. Effect of cannabis on opioid use in patients with  
11 cancer receiving palliative care. *J Am Pharm Assoc (2003)* 2020;60(1):244-7.  
12  
13 doi:10.1016/j.japh.2019.10.013.  
14  
15  
16 50. Pawasarat IM, Schultz EM, Frisby JC, et al. The Efficacy of Medical Marijuana in the  
17 Treatment of Cancer-Related Pain. *J Palliat Med* 2020;23(6):809-16.  
18  
19 doi:10.1089/jpm.2019.0374.  
20  
21  
22 51. Takakuwa KM, Hergenrather JY, Shofer FS, Schears RM. The Impact of Medical  
23 Cannabis on Intermittent and Chronic Opioid Users with Back Pain: How Cannabis Diminished  
24 Prescription Opioid Usage. *Cannabis Cannabinoid Res* 2020;5(3):263-70.  
25  
26 doi:10.1089/can.2019.0039.  
27  
28  
29 52. Vigil JM, Stith SS, Adams IM, Reeve AP. Associations between medical cannabis and  
30 prescription opioid use in chronic pain patients: A preliminary cohort study. *PLoS One*  
31  
32 2017;12(11):e0187795. doi:10.1371/journal.pone.0187795.  
33  
34  
35 53. Yassin M, Oron A, Robinson D. Effect of adding medical cannabis to analgesic treatment  
36 in patients with low back pain related to fibromyalgia: an observational cross-over single centre  
37 study. *Clin Exp Rheumatol* 2019;37 Suppl 116(1):13-20.  
38  
39  
40 54. Rod K. A Pilot Study of a Medical Cannabis - Opioid Reduction Program. *American*  
41  
42  
43  
44  
45  
46  
47  
48  
49  
50  
51  
52  
53  
54  
55  
56  
57  
58  
59  
60

- 1  
2  
3 55. Okusanya BO, Asaolu IO, Ehiri JE, et al. Medical cannabis for the reduction of opioid  
4 dosage in the treatment of non-cancer chronic pain: a systematic review. *Syst Rev* 2020;9(1):167.  
5  
6 doi:10.1186/s13643-020-01425-3.  
7  
8  
9  
10 56. Zaller N, Topletz A, Frater S, Yates G, Lally M. Profiles of medicinal cannabis patients  
11 attending compassion centers in rhode island. *J Psychoactive Drugs* 2015;47(1):18-23.  
12  
13 doi:10.1080/02791072.2014.999901.  
14  
15  
16  
17 57. Hazekamp A, Ware MA, Muller-Vahl KR, Abrams D, Grotenhermen F. The medicinal  
18 use of cannabis and cannabinoids--an international cross-sectional survey on administration  
19 forms. *J Psychoactive Drugs* 2013;45(3):199-210. doi:10.1080/02791072.2013.805976.  
20  
21  
22  
23 58. Lucas P, Walsh Z, Crosby K, et al. Substituting cannabis for prescription drugs, alcohol  
24 and other substances among medical cannabis patients: The impact of contextual factors. *Drug*  
25  
26  
27  
28  
29  
30  
31 59. Cooper ZD, Bedi G, Ramesh D, et al. Impact of co-administration of oxycodone and  
32 smoked cannabis on analgesia and abuse liability. *Neuropsychopharmacology*  
33  
34  
35  
36  
37 2018;43(10):2046-55. doi:10.1038/s41386-018-0011-2.  
38  
39  
40 60. Ishida JH, Wong PO, Cohen BE, et al. Substitution of marijuana for opioids in a national  
41 survey of US adults. *PloS one* 2019;14(10):e0222577.  
42  
43  
44 61. Corroon JM, Jr., Mischley LK, Sexton M. Cannabis as a substitute for prescription drugs  
45 - a cross-sectional study. *J Pain Res* 2017;10:989-98. doi:10.2147/jpr.s134330.  
46  
47  
48 62. Reiman A, Welty M, Solomon P. Cannabis as a Substitute for Opioid-Based Pain  
49 Medication: Patient Self-Report. *Cannabis Cannabinoid Res* 2017;2(1):160-6.  
50  
51  
52  
53  
54  
55  
56  
57  
58  
59  
60

- 1  
2  
3 63. Wang L, Hong PJ, May C, et al. Medical cannabis for chronic pain: a systematic review  
4 and meta-analysis of randomized clinical trials. *BMJ* 2020(submitted).  
5  
6  
7  
8 64. Zeraatkar D, Cooper MA, Agarwal A, et al. Long-term and serious harms of medical  
9 cannabis for chronic pain: A systematic review of non-randomized studies. *BMJ*  
10 2020(submitted).  
11  
12  
13  
14 65. Zeng L, Lytvyn L, Wang X, et al. Values and preferences towards medical cannabis  
15 among patients with chronic pain: A mixed methods systematic review. *BMJ* 2020(submitted).  
16  
17  
18  
19  
20  
21  
22  
23  
24  
25  
26  
27  
28  
29  
30  
31  
32  
33  
34  
35  
36  
37  
38  
39  
40  
41  
42  
43  
44  
45  
46  
47  
48  
49  
50  
51  
52  
53  
54  
55  
56  
57  
58  
59  
60

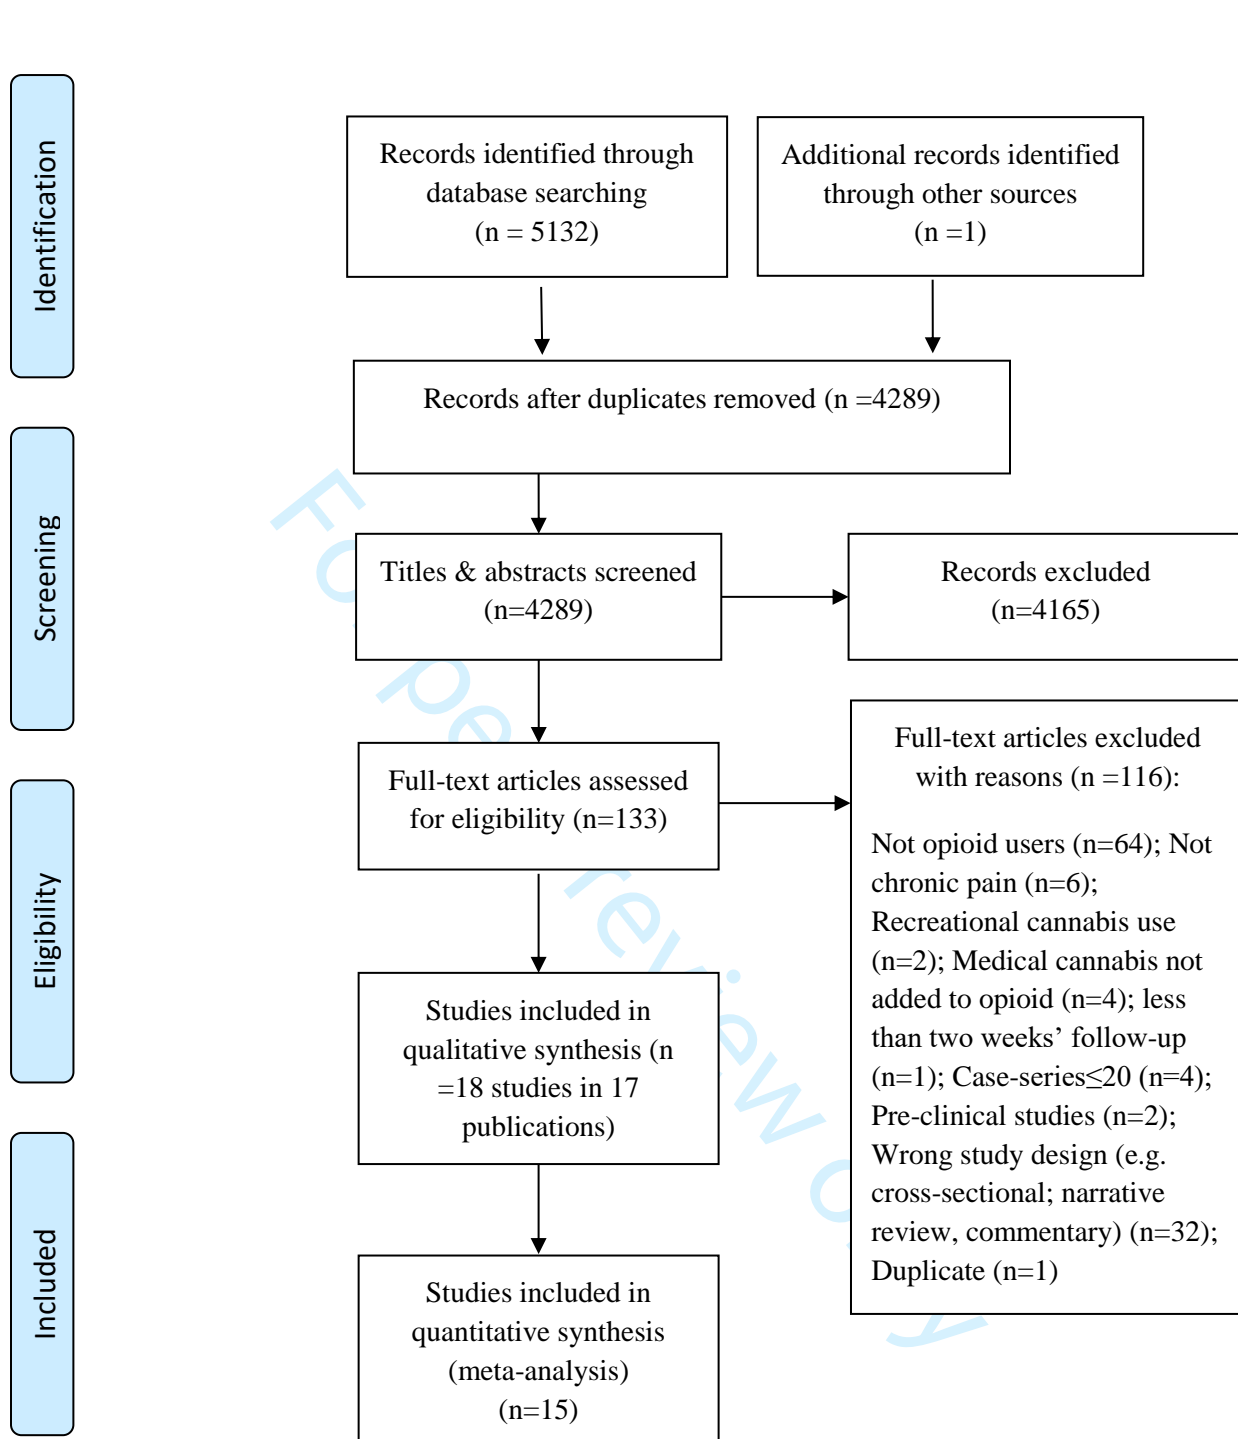

Figure 1: Study selection process in review of opioid-sparing effects of cannabis in chronic pain

## Supplementary Material

## Opioid-sparing effects of cannabis for chronic pain: A systematic review and meta-analysis of randomized and observational studies

### Contents

|                                                                                                                                                                                                                  |    |
|------------------------------------------------------------------------------------------------------------------------------------------------------------------------------------------------------------------|----|
| Appendix A: Literature Search Strategies .....                                                                                                                                                                   | 3  |
| Supplement Table 1: Detailed guidance for risk of bias assessment RCTs .....                                                                                                                                     | 9  |
| Supplement Table 2: Detailed guidance for risk of bias assessment retrospective or prospective chart-reviews with control group .....                                                                            | 12 |
| Supplement Table 3: Detailed guidance for risk of bias assessment retrospective or prospective chart-reviews with no control group .....                                                                         | 16 |
| Supplement Table 4: Characteristics of Eligible studies .....                                                                                                                                                    | 18 |
| Supplement Table 5: Risk of bias assessment for RCTs .....                                                                                                                                                       | 27 |
| Supplement Table 6: Risk of bias assessments for chart reviews with control group .....                                                                                                                          | 28 |
| Supplement Table 7: Risk of bias assessments for one-arm studies with no control group .....                                                                                                                     | 29 |
| Supplement Table 8: GRADE evidence profile of cannabis adjuvant to opioids vs. opioid alone for physical function among patients with chronic pain from 1 RCT .....                                              | 30 |
| Supplement Table 9: GRADE evidence profile of cannabis adjuvant to opioids vs. opioid alone for emotional function among patients with chronic pain from 1 RCT .....                                             | 30 |
| Supplement Table 10: Summary of adverse events among included observational studies .....                                                                                                                        | 31 |
| Supplement Figure 1: forest plot for oral morphine equivalence dose reduction among patients with Chronic Pain who received cannabis adjuvant to opioids vs. opioid alone in RCTs .....                          | 33 |
| Supplement Figure 2: Subgroup analysis for opioid dose reduction and risk of bias (high risk vs. low risk) from 4 RCTs of Cannabis+opioids vs. placebo .....                                                     | 34 |
| Supplement Figure 3: forest plot for oral morphine equivalence dose reduction among patients with Chronic Pain who received cannabis adjuvant to opioids vs. opioid alone in observational studies .....         | 35 |
| Supplement Figure 4: forest plot for pain relief on a 10-cm Visual Analog Scale (VAS) among patients with Chronic Pain who received cannabis adjuvant to opioids vs. opioid alone in RCTs .....                  | 36 |
| Supplement Figure 5: Subgroup analysis for pain relief on a 10-cm VAS and risk of bias (high risk vs. low risk) from 5 RCTs of Cannabis+opioids vs. placebo .....                                                | 37 |
| Supplement Figure 6: forest plot for pain relief on a 10-cm VAS among patients with Chronic Pain who received cannabis adjuvant to opioids vs. opioid alone in observational studies with no control group ..... | 38 |



|    |                                                                                                         |    |
|----|---------------------------------------------------------------------------------------------------------|----|
| 1  |                                                                                                         |    |
| 2  |                                                                                                         |    |
| 3  | Supplement Figure 7: forest plot for sleep disturbance on a 10 cm VAS for sleep disturbance among       |    |
| 4  | patients with Chronic Pain who received cannabis adjuvant to opioids vs. opioid alone in RCTs .....     | 39 |
| 5  |                                                                                                         |    |
| 6  | Supplement Figure 8: Subgroup analysis for sleep disturbance a 10-cm VAS for sleep disturbance and risk |    |
| 7  | of bias (high risk vs. low risk) from 5 RCTs of Cannabis+opioids vs. placebo .....                      | 40 |
| 8  |                                                                                                         |    |
| 9  | Supplement Figure 9: Risk difference of nausea among patients with Chronic Pain who received cannabis   |    |
| 10 | adjuvant to opioids vs. opioid alone in RCTs .....                                                      | 41 |
| 11 |                                                                                                         |    |
| 12 | Supplement Figure 10: Relative Risk of nausea among patients with Chronic Pain who received cannabis    |    |
| 13 | adjuvant to opioids vs. opioid alone in RCTs .....                                                      | 41 |
| 14 |                                                                                                         |    |
| 15 | Supplement Figure 11: Relative Risk of vomiting among patients with Chronic Pain who received           |    |
| 16 | cannabis adjuvant to opioids vs. opioid alone in RCTs .....                                             | 42 |
| 17 |                                                                                                         |    |
| 18 | Supplement Figure 12: Risk Difference of vomiting among patients with Chronic Pain who received         |    |
| 19 | cannabis adjuvant to opioids vs. opioid alone in RCTs .....                                             | 42 |
| 20 |                                                                                                         |    |
| 21 | Supplement Figure 13: Relative Risk of constipation among patients with Chronic Pain who received       |    |
| 22 | cannabis adjuvant to opioids vs. opioid alone in RCTs .....                                             | 43 |
| 23 |                                                                                                         |    |
| 24 | Supplement Figure 14: Risk difference of constipation among patients with Chronic Pain who received     |    |
| 25 | cannabis adjuvant to opioids vs. opioid alone in RCTs .....                                             | 43 |
| 26 |                                                                                                         |    |
| 27 | Appendix B: Reference List of Eligible studies .....                                                    | 44 |
| 28 |                                                                                                         |    |
| 29 | Technical Appendix .....                                                                                | 46 |
| 30 |                                                                                                         |    |
| 31 |                                                                                                         |    |
| 32 |                                                                                                         |    |
| 33 |                                                                                                         |    |
| 34 |                                                                                                         |    |
| 35 |                                                                                                         |    |
| 36 |                                                                                                         |    |
| 37 |                                                                                                         |    |
| 38 |                                                                                                         |    |
| 39 |                                                                                                         |    |
| 40 |                                                                                                         |    |
| 41 |                                                                                                         |    |
| 42 |                                                                                                         |    |
| 43 |                                                                                                         |    |
| 44 |                                                                                                         |    |
| 45 |                                                                                                         |    |
| 46 |                                                                                                         |    |
| 47 |                                                                                                         |    |
| 48 |                                                                                                         |    |
| 49 |                                                                                                         |    |
| 50 |                                                                                                         |    |
| 51 |                                                                                                         |    |
| 52 |                                                                                                         |    |
| 53 |                                                                                                         |    |
| 54 |                                                                                                         |    |
| 55 |                                                                                                         |    |
| 56 |                                                                                                         |    |
| 57 |                                                                                                         |    |
| 58 |                                                                                                         |    |
| 59 |                                                                                                         |    |
| 60 |                                                                                                         |    |

## Appendix A: Literature Search Strategies

### Database: OVID Medline Epub Ahead of Print, In-Process & Other Non-Indexed Citations, Ovid MEDLINE(R) Daily and Ovid MEDLINE(R) 1946 to Present.

The search terminology included all types of chronic pain AND any kinds of cannabinoids:  
 .....

Database: OVID Medline Epub Ahead of Print, In-Process & Other Non-Indexed Citations,

Ovid MEDLINE(R) Daily and Ovid MEDLINE(R) 1946 to Present

Search Strategy:

-----

- 1 exp Analgesics, Opioid/ (111496)
- 2 opioid\*.mp. (112576)
- 3 (alfentanil or alphaprodine or beta-casomorphin\$ or buprenorphine or carfentanil or codeine or deltorphin or dextromethorphan or dezocine or dihydrocodeine or dihydromorphine or enkephalin\$ or ethylketocyclazocine or ethylmorphine or etorphine or fentanyl or heroin or hydrocodone or hydromorphone or ketobemidone or levorphanol or lofentanil or meperidine or meptazinol or methadone or methadyl acetate or morphine or nalbuphine or opium or oxycodone or oxymorphone or pentazocine or phenazocine or phenoperidine or pirinitramide or promedol or propoxyphene or remifentanil or sufentanil or tilidine or tapentadol).mp. [mp=title, abstract, original title, name of substance word, subject heading word, floating sub-heading word, keyword heading word, organism supplementary concept word, protocol supplementary concept word, rare disease supplementary concept word, unique identifier, synonyms] (150565)
- 4 or/1-3 (207118)
- 5 exp Narcotics/ (119511)
- 6 (adolonta or Anpec or Ardinex or Asimadoline or Alvimopam or amadol or biodalgic or biokanol or Codinovo or contramal or Demerol or Dicodid or Dihydrocodeinone or dihydromorphinone or dihydrohydroxycodone or dihydrone or dilaudid or dinarkon or dolsin or dolosal or dolin or dolantin or dolargan or dolcontral or duramorph or duromorph or duragesic or durogesic or eucodal or Fedotzine or Fentanest or Fentora or Fortral or Hycodan or Hycon or Hydrocodone or Hydrocodeinonebitartrate or hydromorphon or hydroxycodone or isocodeine or isonipeccain or jutadol or laudacon or l dromoran or levodroman or levorphan or levodromoran or levodromoran or lexir or lidol or lydol or morfin or morfine or morphia or morphin or morphinium or morphinene or morphium or ms contin or n-methylmorphine or n methylmorphine or nobligan or numorphan or oramorph or oxycodone or oxiconum or oxycone or oxycontin or palladone or pancodine or pethidine or phentanyl or prontosfort or robidone or skenan or sublimaze or sulfentanyl or sulfentanil or sufenta or takadol or talwin or theocodin or tramadol or tramadolhameln or tramador or tramadura or tramagetic or tramagit or tramake or tramal or tramex or tramundin or trasedal or theradol or tiral or topalgic or tradol or tradolpuren or tradonal or tralgiol or tramadorsch or tramadin or tramadoc or ultram or zamudol or zumalgic or zydol or zytram).mp. [mp=title, abstract, original title, name of substance word, subject heading word, floating sub-heading word, keyword heading word, organism

1  
2  
3 supplementary concept word, protocol supplementary concept word, rare disease  
4 supplementary concept word, unique identifier, synonyms] (10373)  
5  
6 7 or/1-6 (213683)  
7 Annotation: opioid block  
8 8 (Cannabis or cannabinol or cannabinoid\* or cannabidiol or bhang or cannador or  
9 charas or ganja or ganjah or hashish or hemp or marihuana or marijuana or nabilone or  
10 cesamet or cesametic or ajulemic acid or cannabichromene or cannabielsoin or  
11 cannabigerol or tetrahydrocannabinol or dronabinol or levonantradol or nabiximols or  
12 palmidrol or tetrahydrocannabinolic acid or tetrahydro cannabinol or marinol or  
13 tetranabinex or sativex or endocannabinoid\*).mp. [mp=title, abstract, original title,  
14 name of substance word, subject heading word, floating sub-heading word, keyword  
15 heading word, organism supplementary concept word, protocol supplementary concept  
16 word, rare disease supplementary concept word, unique identifier, synonyms] (52087)  
17  
18 9 Cannabis/ (8573)  
19 10 exp CANNABINOIDS/ (13258)  
20 11 8 or 9 or 10 (52087)  
21 Annotation: cannabis block  
22 12 7 and 11 (6089)  
23 Annotation: opioid and cannabis  
24 13 (chronic adj4 pain\*).mp. [mp=title, abstract, original title, name of  
25 substance word, subject heading word, floating sub-heading word, keyword heading  
26 word, organism supplementary concept word, protocol supplementary concept word, rare  
27 disease supplementary concept word, unique identifier, synonyms] (65717)  
28  
29 14 Chronic Pain/ (12620)  
30 15 exp Osteoarthritis/ (59676)  
31 16 osteoarthrit\*.mp. (84419)  
32 17 osteo-arthritis.mp. (375)  
33 18 exp Arthritis, Rheumatoid/ (109607)  
34 19 exp Neuralgia/ (19415)  
35 20 Diabetic Neuropathies/ (14247)  
36 21 (neuropath\* adj5 pain\*).mp. [mp=title, abstract, original title, name of  
37 substance word, subject heading word, floating sub-heading word, keyword heading  
38 word, organism supplementary concept word, protocol supplementary concept word, rare  
39 disease supplementary concept word, unique identifier, synonyms] (23043)  
40  
41 22 neuralg\*.mp. (26154)  
42 23 zoster.mp. (20386)  
43 24 Irritable Bowel Syndrome/ (6748)  
44 25 IBS.mp. (8435)  
45 26 Migraine Disorders/ (24388)  
46 27 migraine.mp. (37040)  
47 28 Fibromyalgia/ (8088)  
48 29 fibromyalg\*.mp. (11178)  
49 30 complex regional pain syndromes/ or exp causalgia/ or exp reflex sympathetic  
50 dystrophy/ (5426)  
51  
52 31 Pain, Intractable/ (6126)  
53 32 Phantom Limb/ (1816)  
54 33 Hyperalgesia/ (11136)  
55  
56  
57  
58  
59  
60

- 1  
2  
3 34 exp back pain/ or exp failed back surgery syndrome/ or exp low back pain/  
4 (37369)  
5 35 radiculopathy.mp. (8722)  
6 36 musculoskeletal pain/ or headache/ (29687)  
7 37 exp Headache Disorders/ (33178)  
8 38 headache\*.mp. (89612)  
9 39 exp Temporomandibular Joint Disorders/ (16711)  
10 40 whiplash.mp. or exp whiplash injury/ (3896)  
11 41 exp Cumulative Trauma Disorders/ (13326)  
12 42 exp Peripheral Nervous System Diseases/dt [Drug Therapy] (14079)  
13 43 Pain Measurement/de [Drug Effects] (6594)  
14 44 (backache\* or backpain\* or dorsalg\* or arthralgi\* or polyarthralgi\* or  
15 arthrodyni\* or myalgi\* or fibromyalgi\* or myodyni\* or neuralgi\* or ischialgi\* or crps  
16 or rachialgi\*).ab,ti. (43072)  
17 45 ((noncancer\* or non-cancer\* or back or discogen\* or chronic\* or recurrent or  
18 persist\* or bone or musculoskelet\* or muscle\* or skelet\* or spinal or spine or  
19 vertebra\* or joint\* or arthritis or Intestin\* or neuropath\* or neck or cervical\* or  
20 head or facial\* or complex or radicular or cervicobrachi\* or orofacial or somatic or  
21 non-malign\* or shoulder\* or knee\* or hip or hips) adj3 pain).mp. (206944)  
22 46 exp Pain/ (379991)  
23 47 pain\*.mp. (745044)  
24 48 or/13-47 (1122771)  
25 49 12 and 48 (1034)  
26  
27  
28  
29  
30

31 Database: Embase <1974 to 2019 September 04>

32 Search Strategy:  
33 -----

- 34 1 exp narcotic analgesic agent/ (317763)  
35 2 (opioid\* or opiate\*).mp. [mp=title, abstract, heading word, drug trade name,  
36 original title, device manufacturer, drug manufacturer, device trade name, keyword,  
37 floating subheading word, candidate term word] (188237)  
38 3 (alfentanil or alphaprodine or beta-casomorphin\$ or buprenorphine or  
39 carfentanil or codeine or deltorphin or dextromethorphan or dezocine or  
40 dihydrocodeine or dihydromorphine or enkephalin\$ or ethylketocyclazocine or  
41 ethylmorphine or etorphine or fentanyl or heroin or hydrocodone or hydromorphone or  
42 ketobemidone or levorphanol or lofentanil or meperidine or meptazinol or methadone or  
43 methadyl acetate or morphine or nalbuphine or opium or oxycodone or oxymorphone or  
44 pentazocine or phenazocine or phenoperidine or pirinitramide or promedol or  
45 propoxyphene or remifentanil or sufentanil or tilidine or tapentadol).mp. (278150)  
46 4 (adolonta or Anpec or Ardinex or Asimadoline or Alvimopam or amadol or  
47 biodalgic or biokanol or Codinovo or contramal or Demerol or Dicodid or  
48 Dihydrocodeinone or dihydromorphinone or dihydrohydroxycodone or dihydrone or  
49 dilaudid or dinarkon or dolsin or dolosal or dolin or dolantin or dolargan or  
50 dolcontral or duramorph or duromorph or duragesic or durogesic or eucodal or  
51 Fedotzine or Fentanest or Fentora or Fortral or Hycodan or Hycon or Hydrocodone or  
52 Hydrocodeinonebitartrate or hydromorphon or hydroxycodone or isocodeine or  
53 isonipecaïn or jutadol or laudacon or l dromoran or levodroman or levorphan or levo-

1  
2  
3 dromoran or levodromoran or lexir or lidol or lydol or morfin or morfine or morphia  
4 or morphin or morphinium or morphinene or morphium or ms contin or n-methylmorphine  
5 or n methylmorphine or nobligan or numorphan or oramorph or oxycodoinon or oxiconum  
6 or oxycone or oxycontin or palladone or pancodine or pethidine or phentanyl or  
7 prontosfort or robidone or skenan or sublimaze or sulfentanyl or sulfentanil or  
8 sufenta or takadol or talwin or theocodin or tramadol or tramadolhameln or tramador  
9 or tramadura or tramagetic or tramagit or tramake or tramal or tramex or tramundin or  
10 trasedal or theradol or tiral or topalgic or tradol or tradolpuren or tradonal or  
11 tralgiol or tramadorsch or tramadin or tramadoc or ultram or zamudol or zumalgic or  
12 zydol or zytram).mp. [mp=title, abstract, heading word, drug trade name, original  
13 title, device manufacturer, drug manufacturer, device trade name, keyword, floating  
14 subheading word, candidate term word] (50642)

15  
16 5 or/1-4 (403926)

17  
18 6 exp cannabis/ (32390)

19 7 cannabinoid/ or cannabidiol/ or cannabinoid derivative/ or cannabiol/ or  
20 cannabiol derivative/ or cannabis derivative/ or delta8 tetrahydrocannabinol/ or  
21 delta8 tetrahydrocannabinol derivative/ or "delta9(11) tetrahydrocannabinol"/ or  
22 dronabinol/ or medical cannabis/ or nabiximols/ or tetrahydrocannabinol/ or  
23 tetrahydrocannabinol derivative/ or tetrahydrocannabinolic acid/ (26180)

24 8 (Cannabis or cannabiol or cannabidiol or bhang or cannador or charas or ganja  
25 or ganjah or hashish or hemp or marihuana or marijuana or nabilone or cesamet or  
26 cesametic or ajulemic acid or cannabichromene or cannabielsoin or cannabigerol or  
27 tetrahydrocannabinol or dronabinol or levonantradol or nabiximols or palmidrol or  
28 tetrahydrocannabinolic acid or tetrahydro cannabiol or marinol or tetranabinex or  
29 sativex or endocannabinoid\*).mp. [mp=title, abstract, heading word, drug trade name,  
30 original title, device manufacturer, drug manufacturer, device trade name, keyword,  
31 floating subheading word, candidate term word] (69860)

32  
33 9 6 or 7 or 8 (75281)

34  
35 10 5 and 9 (16412)

36 11 (chronic adj4 pain\*).mp. [mp=title, abstract, heading word, drug trade name,  
37 original title, device manufacturer, drug manufacturer, device trade name, keyword,  
38 floating subheading word, candidate term word] (109897)

39 12 chronic pain/ (57642)

40 13 exp osteoarthritis/ (122475)

41 14 osteoarthritis\*.mp. (136019)

42 15 osteo-arthritis.mp. (424)

43 16 degenerative arthrit\*.mp. (1563)

44 17 exp rheumatoid arthritis/ (194747)

45 18 exp neuralgia/ (99958)

46 19 diabetic neuropathy/ (22699)

47 20 (neuropath\* adj5 (pain\* or diabet\*)).mp. (71799)

48 21 neuralg\*.mp. (29200)

49 22 zoster.mp. (36684)

50 23 irritable colon/ (24792)

51 24 (Irritable Bowel Syndrome or IBS).mp. [mp=title, abstract, heading word, drug  
52 trade name, original title, device manufacturer, drug manufacturer, device trade  
53 name, keyword, floating subheading word, candidate term word] (24025)

54  
55 25 exp migraine/ (60235)

26 migraine.mp. (66593)  
 27 fibromyalgia/ (19402)  
 28 fibromyalg\*.mp. (20958)  
 29 reflex sympathetic dystrophy.mp. (2356)  
 30 (complex regional pain syndromes or causalgia).mp. (1275)  
 31 intractable pain/ (4701)  
 32 phantom limb.mp. or agnosia/ or phantom pain/ or amputation stump/ (7388)  
 33 hyperalgesia/ (18711)  
 34 ((noncancer\* or non-cancer\* or chronic\* or recurrent or persist\* or non-  
 35 malign\*) adj3 pain).mp. (27031)  
 36 exp backache/ (104042)  
 37 radiculopathy.mp. or exp radiculopathy/ (37176)  
 38 musculoskeletal pain/ (10292)  
 39 exp arthralgia/ (58208)  
 40 headache/ (204055)  
 41 headache\*.mp. (264831)  
 42 temporomandibular joint disorder/ (13308)  
 43 ((TMJ or TMJD) and pain\*).mp. (3648)  
 44 whiplash.mp. or whiplash injury/ (4815)  
 45 exp cumulative trauma disorder/ (20089)  
 46 exp pain/ (1249315)  
 47 pain\*.mp. (1280762)  
 48 or/11-46 (1963522)  
 49 10 and 47 (3115)

Search Name: cannabis pain  
 Date Run: 05/09/2019 16:12:03  
 Comment:

| ID  | Search Hits                                                                                                                                                                                                                                                                                                                                                                                                                                                                                                           |
|-----|-----------------------------------------------------------------------------------------------------------------------------------------------------------------------------------------------------------------------------------------------------------------------------------------------------------------------------------------------------------------------------------------------------------------------------------------------------------------------------------------------------------------------|
| #1  | MeSH descriptor: [Cannabis] explode all trees 293                                                                                                                                                                                                                                                                                                                                                                                                                                                                     |
| #2  | MeSH descriptor: [Cannabinoids] explode all trees 743                                                                                                                                                                                                                                                                                                                                                                                                                                                                 |
| #3  | MeSH descriptor: [Endocannabinoids] explode all trees 46                                                                                                                                                                                                                                                                                                                                                                                                                                                              |
| #4  | MeSH descriptor: [Endocannabinoids] explode all trees 46                                                                                                                                                                                                                                                                                                                                                                                                                                                              |
| #5  | (Cannabis or cannabinol or cannabinoid* or cannabidiol or bhang or cannador or charas or ganja or ganjah or hashish or hemp or marihuana or marijuana or nabilone or cesamet or cesametic or ajulemic acid or cannabichromene or cannabielsoin or cannabigerol or tetrahydrocannabinol or dronabinol or levonantradol or nabiximols or palmidrol or tetrahydrocannabinolic acid or tetrahydrocannabinol or marinol or tetranabinex or sativex or endocannabinoid*):ti,ab,kw (Word variations have been searched) 4215 |
| #6  | #1 or #2 or #3 or #4 or #5 4215                                                                                                                                                                                                                                                                                                                                                                                                                                                                                       |
| #7  | MeSH descriptor: [Pain] explode all trees 45094                                                                                                                                                                                                                                                                                                                                                                                                                                                                       |
| #8  | (pain*):ti,ab,kw (Word variations have been searched) 164064                                                                                                                                                                                                                                                                                                                                                                                                                                                          |
| #9  | #7 or #8 169846                                                                                                                                                                                                                                                                                                                                                                                                                                                                                                       |
| #10 | #6 and #9 578                                                                                                                                                                                                                                                                                                                                                                                                                                                                                                         |
| #11 | [mh Osteoarthritis] or [mh ^"Arthritis, Rheumatoid"] or [mh Neuralgia] or [mh ^"Diabetic Neuropathies"] or [mh ^"Irritable Bowel Syndrome"] or [mh ^"Migraine Disorders"] or [mh Fibromyalgia] or [mh ^"complex regional pain syndromes"] or [mh causalgia] or [mh ^"reflex                                                                                                                                                                                                                                           |

1  
2  
3 sympathetic dystrophy"] or [mh ^"pain Intractable"] or [mh ^"Phantom Limb"] or [mh Hyperalgesia] or  
4 [mh ^"back pain"] or [mh ^"failed back surgery syndrome"] or [mh ^"low back pain"] or [mh  
5 Radiculopathy] or [mh ^"musculoskeletal pain"] or [mh headache] or [mh Arthralgia] or [mh ^"Headache  
6 Disorders"] or [mh ^"Temporomandibular Joint Dysfunction Syndrome"] or [mh ^"whiplash injury"] or  
7 [mh ^"Cumulative Trauma Disorders"] or [mh "Peripheral Nervous System Diseases"/DT] or [mh ^"Pain  
8 Measurement"/DE] 28499

9  
10 #12 (osteoarthritis\* or osteo-arthritis or arthritis\* or neuropath\* or neuralgi\* or zoster\* or migraine\*  
11 or headache\* or fibromyalgi\* or causalgia or radiculopathy\* or whiplash or backache\* or backpain\* or  
12 dorsalg\* or arthralgi\* or polyarthralgi\* or arthrodyni\* or myalgi\* or myodyn\* or ischialgi\* or crps or  
13 rachialgi\* or TMJ or TMJD or IBS or crohn\* or colitis\* or enteritis\* or ileitis\*) 104465

14 #13 (irrita\* or inflam\*) near/4 (bowel or colon) 7249

15 #14 #11 or #12 or #13 113256

16 #15 #6 and #14 in Trials 353  
17  
18  
19  
20  
21  
22  
23  
24  
25  
26  
27  
28  
29  
30  
31  
32  
33  
34  
35  
36  
37  
38  
39  
40  
41  
42  
43  
44  
45  
46  
47  
48  
49  
50  
51  
52  
53  
54  
55  
56  
57  
58  
59  
60

1  
2  
3 **Characteristics of eligible studies and Risk of Bias Assessment**  
4  
5  
6

7 **Supplement Table 1: Detailed guidance for risk of bias assessment RCTs**

| Domain                                                                                                                                                                                                                                                                                                                     | Judgment                                                                                                                                                                                                                                                                                                                                                                                                                                                                                                                                                                               |
|----------------------------------------------------------------------------------------------------------------------------------------------------------------------------------------------------------------------------------------------------------------------------------------------------------------------------|----------------------------------------------------------------------------------------------------------------------------------------------------------------------------------------------------------------------------------------------------------------------------------------------------------------------------------------------------------------------------------------------------------------------------------------------------------------------------------------------------------------------------------------------------------------------------------------|
| <p>8 <b>Random allocation concealment</b></p> <p>9</p> <p>10</p> <p>11</p> <p>12</p> <p>13</p> <p>14</p> <p>15</p> <p>16</p> <p>17</p> <p>18</p> <p>19</p> <p>20</p> <p>21</p> <p>22</p> <p>23</p> <p>24</p> <p>25</p> <p>26</p> <p>27</p> <p>28</p> <p>29</p> <p>30</p> <p>31</p> <p>32</p> <p>33</p> <p>34</p> <p>35</p> | <p><b>Definitely yes (low risk):</b> used central allocations (e.g. computer, telephone)</p> <p><b>Probably yes (low risk):</b> sequentially numbered, opaque, sealed envelopes; studies did not provide enough information about concealment approach; however, it was placebo-control trial with double blinded design.</p> <p><b>Probably no (high risk):</b> not enough information was provided and study was not blinded.</p> <p><b>Definitely no (high risk):</b> used any unconcealed approach of allocation (e.g. case record number, day of week, health-care decision).</p> |
| <p>36 <b>Blinding of patients</b></p> <p>37</p> <p>38</p> <p>39</p> <p>40</p> <p>41</p> <p>42</p> <p>43</p> <p>44</p> <p>45</p> <p>46</p> <p>47</p> <p>48</p> <p>49</p> <p>50</p> <p>51</p> <p>52</p> <p>53</p> <p>54</p> <p>55</p> <p>56</p> <p>57</p> <p>58</p> <p>59</p> <p>60</p>                                      | <p><b>Definitely yes (low risk):</b> explicitly mentioned that patients were blinded</p> <p><b>Probably yes (low risk):</b> a placebo-controlled double-blinded trial.</p> <p><b>Probably no (high risk):</b> no explicit statement about blinding status and not double-blinded placebo-controlled trial.</p> <p><b>Definitely no (high risk):</b> explicitly mentioned that patients were not blinded.</p>                                                                                                                                                                           |



|                                                 |                                                                                                                                                                                                                                                                                                                                                           |
|-------------------------------------------------|-----------------------------------------------------------------------------------------------------------------------------------------------------------------------------------------------------------------------------------------------------------------------------------------------------------------------------------------------------------|
| <p><b>Blinding of health care providers</b></p> | <p><b>Definitely yes (low risk):</b> explicitly mentioned that this group was blinded.</p> <p><b>Probably yes (low risk):</b> mentioned that it was a double-blinded study; mentioned investigator were blinded.</p> <p><b>Probably no (high risk)</b></p> <p><b>Definitely no (high risk):</b> explicitly mentioned that this group was not blinded.</p> |
| <p><b>Blinding of data collector</b></p>        | <p><b>Definitely yes (low risk):</b> explicitly mentioned that this group was blinded.</p> <p><b>Probably yes (low risk):</b> mentioned that it was a double-blinded study; mentioned investigator were blinded.</p> <p><b>Probably no (high risk)</b></p> <p><b>Definitely no (high risk):</b> explicitly mentioned that this group was not blinded.</p> |
| <p><b>Blinding of outcome assessor</b></p>      | <p><b>Definitely yes (low risk):</b> explicitly mentioned that this group was blinded.</p> <p><b>Probably yes (low risk):</b> mentioned that it was a double-blinded study.</p> <p><b>Probably no (high risk)</b></p> <p><b>Definitely no (high risk):</b> explicitly mentioned that this group was not blinded; open-blinded or unblinded trial.</p>     |
| <p><b>Blinding data analyst</b></p>             | <p><b>Definitely yes (low risk):</b> explicitly mentioned that this group were blinded</p>                                                                                                                                                                                                                                                                |

|                                 |                                                                                                                                                                                                                                                                                                                                                                                                                                                                                                                      |
|---------------------------------|----------------------------------------------------------------------------------------------------------------------------------------------------------------------------------------------------------------------------------------------------------------------------------------------------------------------------------------------------------------------------------------------------------------------------------------------------------------------------------------------------------------------|
|                                 | <p><b>Probably yes (low risk):</b></p> <p><b>Probably no (high risk):</b> no explicit statement about blinding and only mentioned double-blinded.</p> <p><b>Definitely no (high risk):</b> explicitly mentioned that this group was not blinded; open-blinded or unblinded trial.</p>                                                                                                                                                                                                                                |
| <p><b>Loss to follow-up</b></p> | <p><b>Definitely yes:</b> the retention rate was at least 90% through the study.</p> <p><b>Probably yes (low risk):</b> the retention rate approximately 80-89% and loss to follow-up unlikely to be related to the outcome, or missing outcome data were balanced across groups.</p> <p><b>Probably no (high risk):</b> the retention rate approximately 80-89%, however its rate likely to be related to the loss to follow-up.</p> <p><b>Definitely no (high risk):</b> the retention rate was less than 80%.</p> |
| <p><b>Sample size</b></p>       | <p>We also considered the sample size lower than 250 per arm as high risk of bias and rated down on the basis of imprecision in GRADE assessment.</p>                                                                                                                                                                                                                                                                                                                                                                |

**Supplement Table2: Detailed guidance for risk of bias assessment retrospective or prospective chart-reviews with control group**

| Domain                                                                                                                                                                                                                                                                                                        | Judgment                                                                                                                                                                                                                                                                                                                                                                                                                                                                                                                                            |
|---------------------------------------------------------------------------------------------------------------------------------------------------------------------------------------------------------------------------------------------------------------------------------------------------------------|-----------------------------------------------------------------------------------------------------------------------------------------------------------------------------------------------------------------------------------------------------------------------------------------------------------------------------------------------------------------------------------------------------------------------------------------------------------------------------------------------------------------------------------------------------|
| <p><b>1) Did the study match participants for all variables that are associated with the outcome of interest or did the statistical analysis adjust for these prognostic variables?</b> (This item queries how confident we are that the reported association or lack thereof is not due to confounding).</p> | <p><b>Definitely yes (low risk):</b><br/>studies that adjusted based on all important covariates including age, sex, baseline pain, baseline opioid dose, and other disabilities.</p> <p><b>Probably yes (low risk):</b><br/>studies that adjusted at a minimum for baseline pain and baseline opioid dose.</p> <p><b>Probably no (high risk):</b><br/>studies that did not provide any details about analysis method.</p> <p><b>Definitely no (high risk):</b><br/>Studies that did not adjust based on baseline opioid dose or baseline pain.</p> |
| <p><b>2) Was selection of exposed and non-exposed cohorts drawn from the same population?</b> (this item queries whether participants who co-used cannabis and opioids or used opioids alone were drawn from the same population)</p>                                                                         | <p><b>Definitely yes (low risk):</b><br/>Studies in which selection for participation is not dependent on exposure status (cannabis and opioid co-use).</p> <p><b>Probably yes (low risk):</b><br/>studies that did not provide enough information about recruitment to judge whether recruitment into the study was dependent on exposure status or not.</p> <p><b>Probably no (high risk): NA</b></p>                                                                                                                                             |

|                                                                                                                                                                       |                                                                                                                                                                                                                                                                                                                                                                                                                                                                                                                                                                                                                                                                                                                                                   |
|-----------------------------------------------------------------------------------------------------------------------------------------------------------------------|---------------------------------------------------------------------------------------------------------------------------------------------------------------------------------------------------------------------------------------------------------------------------------------------------------------------------------------------------------------------------------------------------------------------------------------------------------------------------------------------------------------------------------------------------------------------------------------------------------------------------------------------------------------------------------------------------------------------------------------------------|
|                                                                                                                                                                       | <p><b>Definitely no (high risk):</b> studies that compared cannabis and opioid co-users and non-users from different cohort.</p>                                                                                                                                                                                                                                                                                                                                                                                                                                                                                                                                                                                                                  |
| <p>3) <b>Can we be confident in the assessment of exposure?</b> (this item queries how confident we are about the quantification of cannabis and opioids co-use).</p> | <p><b>Definitely yes (low risk):</b> if study reported some ascertainment methods for cannabis use (e.g. urine analysis), or study prescribed the specific dose of medical cannabis to the participants.</p> <p><b>Probably yes (low risk):</b> self-report of cannabis use.</p> <p><b>Probably no (high risk):</b> when study did not provide any details about assessing exposure status.</p> <p><b>Definitely no (high risk):</b> participants self-reported cannabis usage only at baseline, or exposure status not assessed during the 4-weeks follow-up at least one time, or level of cannabis usage was not similar among participants. For example, some studies allowed patients to select the type or dose of cannabis themselves.</p> |
| <p>4) <b>Can we be confident in the assessment of the presence or absence of prognostic factors?</b></p>                                                              | <p><b>Definitely yes (low risk):</b> when patients self-reported the prognostic factors.</p> <p><b>Probably yes (low risk):</b> when the method of assessment was not reported, it was considered as probably yes.</p> <p>*Note that for this item, we are only concerned with the measurement of the prognostic</p>                                                                                                                                                                                                                                                                                                                                                                                                                              |

|                                                                                                                                                                                     |                                                                                                                                                                                                                                                                                                                                                                                                                                                                                                                                                                                     |
|-------------------------------------------------------------------------------------------------------------------------------------------------------------------------------------|-------------------------------------------------------------------------------------------------------------------------------------------------------------------------------------------------------------------------------------------------------------------------------------------------------------------------------------------------------------------------------------------------------------------------------------------------------------------------------------------------------------------------------------------------------------------------------------|
|                                                                                                                                                                                     | factors that mentioned in item number 1 as minimum adjusted variables (baseline pain intensity and opioid dose).                                                                                                                                                                                                                                                                                                                                                                                                                                                                    |
| <p>5) <b>Were co-interventions similar between groups?</b> (this item queries how similar are the use of other pain killers (e.g. NSAIDs) between cannabis users and non-users.</p> | <p><b>Definitely yes (low risk):</b> study reported that co-intervention other than study intervention were limited during the study period.</p> <p><b>Probably yes (low risk):</b> when co-intervention usage was approximately balanced between both intervention and control groups.</p> <p><b>Probably no (high risk):</b> when study did not provide enough information about other drugs that participants may use.</p> <p><b>Definitely no (high risk):</b> when participants were allowed to use all other co-interventions that could affect the outcome of the study.</p> |
| <p>6) <b>Was the follow up of cohorts adequate?</b> (This item queries the risk of bias associated with loss to follow-up and missing outcome data).</p>                            | <p><b>Definitely yes (low risk):</b> the retention rate was at least 90% through the study.</p> <p><b>Probably yes (low risk):</b> the retention rate approximately 80-89% and loss to follow-up unlikely to be related to the outcome.</p> <p><b>Probably no (high risk):</b> the retention rate approximately 80-89%, however its rate likely to be related to the loss to follow-up. For instance, if patients were required to come to clinic for</p>                                                                                                                           |

|                                                                                                                                                          |                                                                                                                                                                                                                                                                                                                                                                                                                                                                                            |
|----------------------------------------------------------------------------------------------------------------------------------------------------------|--------------------------------------------------------------------------------------------------------------------------------------------------------------------------------------------------------------------------------------------------------------------------------------------------------------------------------------------------------------------------------------------------------------------------------------------------------------------------------------------|
|                                                                                                                                                          | <p>outcome measurement, patients who had poorer outcomes, or on the other hand, patients who were feeling better, may be less likely to attend the clinic.</p> <p>Loss to follow-up did not report or could not estimate.</p> <p><b>Definitely no (high risk):</b> loss to follow-up more than 20%.</p>                                                                                                                                                                                    |
| <p>7) <b>Can we be confident in the assessment of outcome?</b> (This item queries our confidence in the accuracy of the measurement of the outcome).</p> | <p><b>Definitely yes (low risk):</b> study used a validated/reliable measurement for pain assessment (e.g. VAS, NRS); reported opioid dose in a morphine equivalence dose by assessing patients' medical or prescription records.</p> <p><b>Probably yes (low risk):</b> NA</p> <p><b>Probably no (high risk):</b> when study did not provide enough information about the outcome measurement.</p> <p><b>Definitely no (high risk):</b> study used non-validated/reliable instrument.</p> |

**Supplement Table 3: Detailed guidance for risk of bias assessment retrospective or prospective chart-reviews with no control group**

| Domain                                                                                            | Judgment                                                                                                                                                                                                                                                                                                                                                                                                                                                                                                                                                               |
|---------------------------------------------------------------------------------------------------|------------------------------------------------------------------------------------------------------------------------------------------------------------------------------------------------------------------------------------------------------------------------------------------------------------------------------------------------------------------------------------------------------------------------------------------------------------------------------------------------------------------------------------------------------------------------|
| <p><b>Is the source population (sampling frame) representative of the general population?</b></p> | <p><b>Definitely yes (low risk):</b> participants were selected from a representative sample (e.g. national population registry)</p> <p><b>Probably yes (low risk):</b> single community center, however the center was the only referral center that provided cannabis legally to participants.</p> <p><b>Probably no (high risk):</b> based on the provided information source population could not be defined.</p> <p><b>Definitely no (high risk):</b> sampling from one center or clinic or hospital or patients selected through using convenience sampling.</p> |
| <p><b>Is the assessment of the outcome accurate both at baseline and at follow-up?</b></p>        | <p><b>Definitely yes (low risk):</b> study used a validated/reliable measurement for pain assessment (e.g. VAS, NRS); reported opioid dose in a morphine equivalence dose by assessing patients' medical or prescription records.</p> <p><b>Probably yes (low risk):</b> NA</p> <p><b>Probably no (high risk):</b> when study did not provide enough information about the outcome measurement.</p> <p><b>Definitely no (high risk):</b> used of different instruments at different follow-up intervals with concern of</p>                                            |

|                                      |                                                                                                                                                                                                                                                                                                                                                                                                                                                                                                                                                                                                                                                                                                                                                            |
|--------------------------------------|------------------------------------------------------------------------------------------------------------------------------------------------------------------------------------------------------------------------------------------------------------------------------------------------------------------------------------------------------------------------------------------------------------------------------------------------------------------------------------------------------------------------------------------------------------------------------------------------------------------------------------------------------------------------------------------------------------------------------------------------------------|
|                                      | accuracy of responses, or used invalidated/reliable instruments.                                                                                                                                                                                                                                                                                                                                                                                                                                                                                                                                                                                                                                                                                           |
| <b>Is there little missing data?</b> | <p><b>Definitely yes (low risk):</b> the retention rate was at least 90% through the study.</p> <p><b>Probably yes (low risk):</b> the retention rate approximately 80-89% and loss to follow-up unlikely to be related to the outcome.</p> <p><b>Probably no (high risk):</b> the retention rate approximately 80-89%, however its rate likely to be related to the loss to follow-up. For instance, if patients were required to come to clinic for outcome measurement, patients who had poorer outcomes, or on the other hand, patients who were feeling better, may be less likely to attend the clinic.</p> <p>Loss to follow-up did not report or could not estimate.</p> <p><b>Definitely no (high risk):</b> loss to follow-up more than 20%.</p> |



1  
2  
3 **Supplement Table 4: Characteristics of Eligible studies**  
4  
5  
6

7 **Barlowe et al-2019<sup>1</sup>**  
8

|                                     |                                                                                                                                                                  |
|-------------------------------------|------------------------------------------------------------------------------------------------------------------------------------------------------------------|
| 9 <b>Study design</b>               | Retrospective chart review.                                                                                                                                      |
| 10 <b>Participants</b>              | 34 chronic painful pancreatitis patients with chronic use of opioids enrolled in a state therapeutic cannabis program were compared to 19 non-enrolled patients. |
| 11 <b>Intervention (comparison)</b> | medical cannabis added to opioids (no cannabis).                                                                                                                 |
| 12 <b>Follow-up</b>                 | Cohort of patients who enrolled into the program had received cannabis therapy with a range from 34 to 297 weeks.                                                |
| 13 <b>Funding source</b>            | No industry funding reported.                                                                                                                                    |
| 14 <b>Outcome</b>                   | -Reduction of opioid (calculated in average daily intravenous [IV] morphine equivalence dosages)                                                                 |

15  
16  
17  
18  
19  
20  
21  
22  
23  
24  
25  
26  
27  
28  
29  
30 **Bellnier et al-2018<sup>2</sup>**  
31

|                                     |                                                                                                                                                             |
|-------------------------------------|-------------------------------------------------------------------------------------------------------------------------------------------------------------|
| 32 <b>Study design</b>              | One-arm observational study (before/after).                                                                                                                 |
| 33 <b>Participants</b>              | 29 patients with chronic pain who used opioids enrolled in a state therapeutic cannabis program.                                                            |
| 34 <b>Intervention (comparison)</b> | medical cannabis added to opioids (no cannabis).                                                                                                            |
| 35 <b>Follow-up</b>                 | 3 months                                                                                                                                                    |
| 36 <b>Funding source</b>            | Not reported.                                                                                                                                               |
| 37 <b>Outcome</b>                   | -Reduction of opioid (calculated in average daily intravenous [IV] morphine equivalence dosages)<br>-Pain Quality Assessment Scale (PQAS) paroxysmal domain |

38  
39  
40  
41  
42  
43  
44  
45  
46 **Capano et al-2020<sup>3</sup>**  
47

|                                     |                                                                                             |
|-------------------------------------|---------------------------------------------------------------------------------------------|
| 48 <b>Study design</b>              | One-arm observational study (before/after).                                                 |
| 49 <b>Participants</b>              | 131 patients with chronic pain who used opioids enrolled in a pain clinic cannabis therapy. |
| 50 <b>Intervention (comparison)</b> | medical cannabis added to opioids (no cannabis).                                            |
| 51 <b>Follow-up</b>                 | 8 weeks                                                                                     |
| 52 <b>Funding source</b>            | Industry fund reported.                                                                     |
| 53 <b>Outcome</b>                   | - Pain disability index                                                                     |

- Pittsburgh Sleep Quality Index
- Pain intensity and interference index

#### Haroutounian et al-2016<sup>4</sup>

|                                  |                                                                                                                                                                                                                                                                                                         |
|----------------------------------|---------------------------------------------------------------------------------------------------------------------------------------------------------------------------------------------------------------------------------------------------------------------------------------------------------|
| <b>Study design</b>              | One-arm observational study (before/after).                                                                                                                                                                                                                                                             |
| <b>Participants</b>              | Chronic non-cancer pain (14 individuals had pain due to cancer) with a duration of 3 months or longer, and a lack of satisfactory analgesic response or intolerable adverse effects with at least 2 analgesics from 2 different drug classes at full dose (Opioid user: N=73; 35%).                     |
| <b>Intervention (comparison)</b> | The initial recommended medical cannabis dose was 20 g/mo added to opioids, which could be obtained as smoked cannabis, baked cookies or oil taking from cannabis dispensary centers. Cannabis could be titrated up to 3 times a day until satisfactory pain relief was gained (before using cannabis). |
| <b>Follow-up</b>                 | 6 months.                                                                                                                                                                                                                                                                                               |
| <b>Funding source</b>            | No industry funding reported.                                                                                                                                                                                                                                                                           |
| <b>Outcome</b>                   | - Reduction of opioid (calculated in median daily intravenous [IV] morphine equivalence dosages among opioid users).                                                                                                                                                                                    |

#### Maida et al-2008<sup>5</sup>

|                                  |                                                                                                                               |
|----------------------------------|-------------------------------------------------------------------------------------------------------------------------------|
| <b>Study design</b>              | Prospective cohort study.                                                                                                     |
| <b>Participants</b>              | 47 patients with chronic cancer pain who were opioid user and treated with nabilone were compared to 65 non-treated patients. |
| <b>Intervention (comparison)</b> | nabilone added to opioids (no nabilone).                                                                                      |
| <b>Follow-up</b>                 | 30 days.                                                                                                                      |
| <b>Funding source</b>            | Industry funding reported.                                                                                                    |
| <b>Outcome</b>                   | -Reduction of opioid (calculated in average daily morphine equivalence dosages);                                              |

-Pain reduction (Edmonton Symptom Assessment System 0: no pain-10: most severe pain);  
-anxiety, nausea, depression.

### Narange et al-2008<sup>6</sup>

|                                  |                                                                                                                                                                                                                                                                                |
|----------------------------------|--------------------------------------------------------------------------------------------------------------------------------------------------------------------------------------------------------------------------------------------------------------------------------|
| <b>Study design</b>              | Phase II: One-arm observational study (before/after).                                                                                                                                                                                                                          |
| <b>Participants</b>              | 30 patients with chronic non-cancer pain who were taking opioids for a long time.                                                                                                                                                                                              |
| <b>Intervention (comparison)</b> | The starting dose was 5mg of dronabinol twice daily and titrated up to 20 mg 3 times a day added to opioids (before using dronabinol).                                                                                                                                         |
| <b>Follow-up</b>                 | 4 weeks                                                                                                                                                                                                                                                                        |
| <b>Funding source</b>            | Industry funding reported.                                                                                                                                                                                                                                                     |
| <b>Outcome</b>                   | -Pain reduction (VAS 0: no pain-10: most severe pain);<br>-patients' satisfaction<br>-pain interfere with sleep (Brief pain inventory)<br><br>-social functioning<br><br>-sleep disturbance<br><br>-adverse events including anxiety, dizziness, and inability to concentrate. |

### O'Connell et al-2019<sup>7</sup>

|                                  |                                                                                                   |
|----------------------------------|---------------------------------------------------------------------------------------------------|
| <b>Study design</b>              | One-arm observational study (before/after).                                                       |
| <b>Participants</b>              | 77 mixed type of chronic non-cancer pain patients who used opioids (96%) or benzodiazepines.      |
| <b>Intervention (comparison)</b> | Medical cannabis including THC, CBD products added to opioid (before using cannabis)              |
| <b>Follow-up</b>                 | 6 months                                                                                          |
| <b>Funding source</b>            | No industry funding reported.                                                                     |
| <b>Outcome</b>                   | - Reduction of opioid (calculated in mean daily morphine equivalence dosages among opioid users). |

-pain reduction (VAS 0: no pain-10: most severe pain).

### Pritchard-2019<sup>8</sup>

|                                  |                                                                                                                                                                            |
|----------------------------------|----------------------------------------------------------------------------------------------------------------------------------------------------------------------------|
| <b>Study design</b>              | Retrospective chart review.                                                                                                                                                |
| <b>Participants</b>              | 22 patients who had chronic cancer-related pain and used opioids with the presence of THC in their urine drug screening were compared to 61 patients with opioid use only. |
| <b>Intervention (comparison)</b> | medical cannabis added to opioids (no cannabis).                                                                                                                           |
| <b>Follow-up</b>                 | 26 weeks.                                                                                                                                                                  |
| <b>Funding source</b>            | No industry funding reported.                                                                                                                                              |
| <b>Outcome</b>                   | -Reduction of opioid (calculated in average daily intravenous [IV] morphine equivalence dosages)                                                                           |

### Pawasarat-2020<sup>9</sup>

|                                  |                                                                                                                                                                                        |
|----------------------------------|----------------------------------------------------------------------------------------------------------------------------------------------------------------------------------------|
| <b>Study design</b>              | Retrospective chart review.                                                                                                                                                            |
| <b>Participants</b>              | 137 chronic cancer-related pain patients with chronic use of opioids enrolled in a State of New Jersey Medicinal Marijuana Program Registry were compared to 95 non-enrolled patients. |
| <b>Intervention (comparison)</b> | medical cannabis added to opioids (no cannabis).                                                                                                                                       |
| <b>Follow-up</b>                 | Between 36 and 52 weeks for enrolled patients and 24 weeks for non-enrolled patients.                                                                                                  |
| <b>Funding source</b>            | No industry funding reported.                                                                                                                                                          |
| <b>Outcome</b>                   | -Reduction of opioid (calculated in average daily intravenous [IV] morphine equivalence dosages)<br><br>-Pain reduction.                                                               |

**Rod-2019<sup>10</sup>**

|                                  |                                                                                                                                |
|----------------------------------|--------------------------------------------------------------------------------------------------------------------------------|
| <b>Study design</b>              | One-arm observational study (before/after).                                                                                    |
| <b>Participants</b>              | 600 of chronic pain patients who used opioids and indicated they were prepared to reduce their opioid dose.                    |
| <b>Intervention (comparison)</b> | Medical cannabis added to opioid (before using cannabis)                                                                       |
| <b>Follow-up</b>                 | 6 months                                                                                                                       |
| <b>Funding source</b>            | No industry funding reported.                                                                                                  |
| <b>Outcome</b>                   | - Reduction or cease of opioid use (reported as percentage of patients who ceased or reduced their opioid use after 6 months). |

**Takakuwa et al-2020<sup>11</sup>**

|                                  |                                                                                                                              |
|----------------------------------|------------------------------------------------------------------------------------------------------------------------------|
| <b>Study design</b>              | One-arm observational study (before/after).                                                                                  |
| <b>Participants</b>              | 61 of chronic non-cancer pain patients (low-back pain) who used opioids.                                                     |
| <b>Intervention (comparison)</b> | Medical cannabis added to opioid (before using cannabis)                                                                     |
| <b>Follow-up</b>                 | Median of 6.4 years among patients who ceased opioids completely                                                             |
| <b>Funding source</b>            | Industry funding reported.                                                                                                   |
| <b>Outcome</b>                   | - Reduction of opioid (calculated in median daily morphine equivalence dosages among chronic and intermittent opioid users). |

**Vigil et al-2017<sup>12</sup>**

|                                  |                                                                                                                                    |
|----------------------------------|------------------------------------------------------------------------------------------------------------------------------------|
| <b>Study design</b>              | Retrospective chart review.                                                                                                        |
| <b>Participants</b>              | 37 habitual opioid using, severe CNCP patients enrolled in the Medical Cannabis Program were compared to 29 non-enrolled patients. |
| <b>Intervention (comparison)</b> | Medical cannabis added to opioids (no cannabis).                                                                                   |
| <b>Follow-up</b>                 | 1 year.                                                                                                                            |

|                       |                                                                                                                                                                                                                                                                                                                                                                                                                                                                  |
|-----------------------|------------------------------------------------------------------------------------------------------------------------------------------------------------------------------------------------------------------------------------------------------------------------------------------------------------------------------------------------------------------------------------------------------------------------------------------------------------------|
| <b>Funding source</b> | No industry funding reported.                                                                                                                                                                                                                                                                                                                                                                                                                                    |
| <b>Outcome</b>        | <p>-Cessation of opioid (defined as the absence of opioid prescriptions activity during the last three months of observation)</p> <p>-Reduction of opioid (calculated in average daily intravenous [IV] morphine equivalence dosages);</p> <p>-Pain reduction only among cannabis users;</p> <p>-Quality of life (no effect; good benefit; great benefit; negative effect; and extremely negative effect of co-prescription of cannabis on quality of life).</p> |

### Yassin et al-2019<sup>13</sup>

|                                  |                                                                                                                                                                                                                                                                                                                                                                                                          |
|----------------------------------|----------------------------------------------------------------------------------------------------------------------------------------------------------------------------------------------------------------------------------------------------------------------------------------------------------------------------------------------------------------------------------------------------------|
| <b>Study design</b>              | One-arm observational study (before/after).                                                                                                                                                                                                                                                                                                                                                              |
| <b>Participants</b>              | 31 patients with fibromyalgia were treated for at least 12 months with 5 mg of oxycodone hydrochloride equivalent to 4.5 mg oxycodone and 2.5 mg naloxone hydrochloride twice a day and duloxetine 30 mg once a day.                                                                                                                                                                                     |
| <b>Intervention (comparison)</b> | 20 grams of smoked medical cannabis added to opioids (before cannabis inhalation).                                                                                                                                                                                                                                                                                                                       |
| <b>Follow-up</b>                 | 6 months                                                                                                                                                                                                                                                                                                                                                                                                 |
| <b>Funding source</b>            | No industry funding reported.                                                                                                                                                                                                                                                                                                                                                                            |
| <b>Outcome</b>                   | <p>-Pain reduction</p> <p>-Change in pain medication use in 5 categories: 1- increased doses, 2- stable dose through medical cannabis therapy duration, 3- less than half reduction in medication consumption, 4- more than half reduction in analgesic consumption, 5-decreased analgesic consumption.</p> <p>- Oswestry Disability Index reduction (scale 0: no disability, 100: total disability)</p> |

**Johnson et al-2010<sup>14</sup>**

|                                  |                                                                                                                                                                                                                                                                                                                                                                                                |
|----------------------------------|------------------------------------------------------------------------------------------------------------------------------------------------------------------------------------------------------------------------------------------------------------------------------------------------------------------------------------------------------------------------------------------------|
| <b>Study design</b>              | Parallel, multi-center randomized double-blinded, placebo-controlled trial.                                                                                                                                                                                                                                                                                                                    |
| <b>Participants</b>              | 177 patients with chronic cancer pain who were under treatment by opioid regimen.                                                                                                                                                                                                                                                                                                              |
| <b>Intervention (comparison)</b> | tetrahydrocannabinol: cannabidiol (THC:CBD) extract added to opioids (placebo)                                                                                                                                                                                                                                                                                                                 |
| <b>Follow-up</b>                 | 2 weeks                                                                                                                                                                                                                                                                                                                                                                                        |
| <b>Funding source</b>            | Industry funding reported.                                                                                                                                                                                                                                                                                                                                                                     |
| <b>Outcome</b>                   | <ul style="list-style-type: none"> <li>- Reduction of opioid (calculated in mean daily morphine equivalence dosages)</li> <li>-Pain reduction (VAS 0: no pain-10: most severe pain)</li> <li>-Sleep disturbance (NRS 0: no disturbance-10: most severe disturbance)</li> <li>-Physical, emotional, role, and social functioning (QLQ-C30)</li> <li>-Nausea, vomiting, constipation.</li> </ul> |

**Portenoy et al-2012<sup>15</sup>**

|                                  |                                                                                                                                                                                                                                                                                                                   |
|----------------------------------|-------------------------------------------------------------------------------------------------------------------------------------------------------------------------------------------------------------------------------------------------------------------------------------------------------------------|
| <b>Study design</b>              | Parallel, randomized double-blinded, placebo-controlled trial.                                                                                                                                                                                                                                                    |
| <b>Participants</b>              | 360 patients with chronic cancer pain who were under treatment by opioid regimen.                                                                                                                                                                                                                                 |
| <b>Intervention (comparison)</b> | Nabiximols at a low dose (1–4 sprays/day), medium dose (6–10 sprays/day), or high dose (11–16 sprays/day) added to opioids-(placebo)                                                                                                                                                                              |
| <b>Follow-up</b>                 | 5 weeks                                                                                                                                                                                                                                                                                                           |
| <b>Funding source</b>            | Industry funding reported.                                                                                                                                                                                                                                                                                        |
| <b>Outcome</b>                   | <ul style="list-style-type: none"> <li>- Reduction of opioid (calculated in mean daily morphine equivalence dosages)</li> <li>-Pain reduction (VAS 0: no pain-10: most severe pain)</li> <li>-Sleep disturbance (NRS 0: no disturbance-10: most severe disturbance)</li> <li>-Pain interference-BPI-SF</li> </ul> |

- Patient Assessment of Constipation Quality of Life (PAC-QoL)
- Montgomery-Asberg Depression Rating Scale
- Opioid composite score
- Nausea, vomiting, constipation.

### Fallon et al-2017-Study 1<sup>16</sup>

|                                  |                                                                                                                                                                                                                                                                                                                                                                                                                                                                               |
|----------------------------------|-------------------------------------------------------------------------------------------------------------------------------------------------------------------------------------------------------------------------------------------------------------------------------------------------------------------------------------------------------------------------------------------------------------------------------------------------------------------------------|
| <b>Study design</b>              | Parallel, multi-center randomized double-blinded, placebo-controlled trial.                                                                                                                                                                                                                                                                                                                                                                                                   |
| <b>Participants</b>              | 399 patients with chronic cancer pain who were under treatment by opioid regimen.                                                                                                                                                                                                                                                                                                                                                                                             |
| <b>Intervention (comparison)</b> | Sativex ( $\Delta 9$ -tetrahydrocannabinol (27 mg/mL): cannabidiol (25 mg/mL) added to opioids (placebo)                                                                                                                                                                                                                                                                                                                                                                      |
| <b>Follow-up</b>                 | 5 weeks                                                                                                                                                                                                                                                                                                                                                                                                                                                                       |
| <b>Funding source</b>            | Industry funding reported.                                                                                                                                                                                                                                                                                                                                                                                                                                                    |
| <b>Outcome</b>                   | <ul style="list-style-type: none"> <li>-Reduction of opioid (calculated in mean daily morphine equivalence dosages)</li> <li>-Pain reduction (VAS 0: no pain-10: most severe pain)</li> <li>-Sleep disturbance (NRS 0: no disturbance-10: most severe disturbance)</li> <li>-Mean constipation (NRS 0: no constipation-10: most severe constipation)</li> <li>-Global Impression of Change (SGIC), Patient Satisfaction</li> <li>- Nausea, vomiting, constipation.</li> </ul> |

### Fallon et al-2017-Study 2<sup>16</sup>

|                                  |                                                                                                                                                                          |
|----------------------------------|--------------------------------------------------------------------------------------------------------------------------------------------------------------------------|
| <b>Study design</b>              | Parallel, multi-center randomized double-blinded, placebo-controlled trial.                                                                                              |
| <b>Participants</b>              | 206 patients with chronic cancer pain who were under treatment by opioid regimen.                                                                                        |
| <b>Intervention (comparison)</b> | Sativex ( $\Delta 9$ -tetrahydrocannabinol (27 mg/mL): cannabidiol (25 mg/mL)) added to opioids (placebo)-patients who tolerated titrated dose of cannabis and showed an |



|                       |                                                                                                                                                                                                                                                                                                                                                            |
|-----------------------|------------------------------------------------------------------------------------------------------------------------------------------------------------------------------------------------------------------------------------------------------------------------------------------------------------------------------------------------------------|
|                       | improvement of at least 15% on pain NRS score randomized into this study (randomized withdrawal design).                                                                                                                                                                                                                                                   |
| <b>Follow-up</b>      | 5 weeks                                                                                                                                                                                                                                                                                                                                                    |
| <b>Funding source</b> | Industry funding reported.                                                                                                                                                                                                                                                                                                                                 |
| <b>Outcome</b>        | -Reduction of opioid (calculated in mean daily morphine equivalence dosages)<br>-Pain reduction (VAS 0: no pain-10: most severe pain)<br>-Sleep disturbance (NRS 0: no disturbance-10: most severe disturbance)<br>- Global Impression of Change (SGIC), Patient Satisfaction<br>- mean constipation (NRS 0: no constipation-10: most severe constipation) |

### Lichtman et al-2017<sup>17</sup>

|                                  |                                                                                                                                                                                                                                                                                                                                                          |
|----------------------------------|----------------------------------------------------------------------------------------------------------------------------------------------------------------------------------------------------------------------------------------------------------------------------------------------------------------------------------------------------------|
| <b>Study design</b>              | Parallel, multi-center randomized double-blinded, placebo-controlled trial.                                                                                                                                                                                                                                                                              |
| <b>Participants</b>              | 397 patients with chronic cancer pain who were under treatment by opioid regimen.                                                                                                                                                                                                                                                                        |
| <b>Intervention (comparison)</b> | Nabiximols was added to opioids and was titrated the maximum allowed daily dosage of 10 sprays per day (placebo).                                                                                                                                                                                                                                        |
| <b>Follow-up</b>                 | 5 weeks                                                                                                                                                                                                                                                                                                                                                  |
| <b>Funding source</b>            | Industry funding reported.                                                                                                                                                                                                                                                                                                                               |
| <b>Outcome</b>                   | -Reduction of opioid (calculated in mean daily morphine equivalence dosages)<br>-Pain reduction (NRS 0: no pain-10: most severe pain)<br>-Sleep disturbance (NRS 0: no disturbance-10: most severe disturbance)<br>-Mean constipation (NRS 0: no constipation-10: most severe constipation)<br>-Global Impression of Change (SGIC), Patient Satisfaction |

Supplement Table 5: Risk of bias assessment for RCTs

| Study (author-year)       | Allocation concealment | Blinding of patients | Blinding of health care providers | Blinding of data collectors | Blinding of outcome assessors | Blinding of Data analyst | Loss to follow-up ( $\leq 20\%$ ) |
|---------------------------|------------------------|----------------------|-----------------------------------|-----------------------------|-------------------------------|--------------------------|-----------------------------------|
| Johnson et al-2010        | PY                     | PY                   | PY                                | PY                          | PY                            | PN                       | PY <sup>€</sup>                   |
| Portenoy et al-2012       | DY                     | DY                   | PY                                | PY                          | PY                            | PN                       | DN <sup>£</sup>                   |
| Fallon et al-2017 Study 1 | PY                     | PY                   | PY                                | PY                          | PY                            | PN                       | DN <sup>¥</sup>                   |
| Fallon et al-2017 Study 2 | PY                     | PY                   | PY                                | PY                          | PY                            | PN                       | PY <sup>€</sup>                   |
| Lichtman et al-2017       | PY                     | PY                   | PY                                | PY                          | PY                            | PN                       | DN <sup>¥</sup>                   |

\*definitely/probably yes= low risk of bias; definitely//probably no=high risk of bias.

<sup>£</sup> The rate of loss to follow-up was more than 27%.

<sup>¥</sup>The rate of loss to follow-up was approximately 26%.

<sup>€</sup>The rate of loss to follow-up was approximately less than 20%

**Supplement Table 6: Risk of bias assessments for chart reviews with control group**

| Study          | Were the exposed and unexposed drawn from same | Are we confident in the assessment of exposure? | Can we be confident in the assessment of the presence or absence of prognostic | Can we be confident in the outcome assessment? | Was there adequate follow-up? | Were the co-interventions similar? | Did the authors adjust for different confounders? | Overall risk of bias |
|----------------|------------------------------------------------|-------------------------------------------------|--------------------------------------------------------------------------------|------------------------------------------------|-------------------------------|------------------------------------|---------------------------------------------------|----------------------|
| Vigil 2017     | DY                                             | DN                                              | PY                                                                             | PN                                             | PY                            | PN                                 | PY                                                | High                 |
| Maida 2008     | DY                                             | DY                                              | PY                                                                             | DY                                             | PN                            | PN                                 | PY                                                | High                 |
| Barlowe 2019   | DY                                             | DN                                              | PY                                                                             | DY                                             | PN                            | PN                                 | PN                                                | High                 |
| Pritchard-2020 | DY                                             | DY                                              | PY                                                                             | DY                                             | DN                            | PN                                 | PN                                                | High                 |
| Pawasarat-2020 | DY                                             | DN                                              | PY                                                                             | DY                                             | DY                            | PN                                 | PN                                                | High                 |

**\*DY: definitely yes; DN: definitely no; PY: probably yes; PN: probably no; DY/PY= low risk of bias; DN/PN=high risk of bias.**

**Supplement Table 7: Risk of bias assessments for one-arm studies with no control group**

| Study                   | Is the source population (sampling frame) representative of the general population? | Is the assessment of the outcome accurate both at baseline and at follow-up? | Is there little missing data? | Overall risk of bias |
|-------------------------|-------------------------------------------------------------------------------------|------------------------------------------------------------------------------|-------------------------------|----------------------|
| Haroutounian et al-2016 | DN                                                                                  | DY                                                                           | PN                            | High                 |
| Narang et al-2008       | DN                                                                                  | DY                                                                           | PY                            | High                 |
| Yassin et al-2019       | DN                                                                                  | DY                                                                           | PY                            | High                 |
| O'Connell et al-2019    | DN                                                                                  | DY                                                                           | PY                            | High                 |
| Takakuwa et al-2020     | DN                                                                                  | DY                                                                           | PY                            | High                 |
| Vigil et al-2017        | DN                                                                                  | PN                                                                           | PY                            | High                 |
| Bellnier-2018           | DN                                                                                  | DY                                                                           | DY                            | High                 |
| Capano et al-2020       | DN                                                                                  | DY                                                                           | PN                            | High                 |
| Rod-2019                | DN                                                                                  | PN                                                                           | PN                            | High                 |

**\*definitely/probably yes= low risk of bias; definitely//probably no=high risk of bias.**

**Supplement Table 8: GRADE evidence profile of cannabis adjuvant to opioids vs. opioid alone for physical function among patients with chronic pain from 1 RCT<sup>14</sup>**

| Outcome              | n of participants (studies)                     | Follow-up | Mean difference                                                                   | Certainty of evidence (GRADE) | Plain-language summary                                                     |
|----------------------|-------------------------------------------------|-----------|-----------------------------------------------------------------------------------|-------------------------------|----------------------------------------------------------------------------|
| Physical functioning | Cannabis=118, placebo=59 (1 RCT <sup>14</sup> ) | Two weeks | THC: CBD vs. placebo: -4.23 ( $P=0.108$ )<br>THC vs. placebo: -1.25 ( $P=0.631$ ) | Moderate <sup>b</sup>         | Adding cannabis to opioids probably does not improve physical functioning. |

<sup>a</sup> In favor of placebo; <sup>b</sup> Due to imprecision.

**Supplement Table 9: GRADE evidence profile of cannabis adjuvant to opioids vs. opioid alone for emotional function among patients with chronic pain from 1 RCT<sup>14</sup>**

| Outcome               | n of participants (studies)                     | Follow-up | Mean difference                                                                 | Certainty of evidence (GRADE) | Plain-language summary                                                      |
|-----------------------|-------------------------------------------------|-----------|---------------------------------------------------------------------------------|-------------------------------|-----------------------------------------------------------------------------|
| Emotional functioning | Cannabis=118, placebo=59 (1 RCT <sup>14</sup> ) | Two weeks | THC: CBD vs. placebo: 6.73 ( $P=0.084$ )<br>THC vs. placebo: 5.22 ( $P=0.174$ ) | Moderate <sup>b</sup>         | Adding cannabis to opioids probably does not improve emotional functioning. |

<sup>a</sup> In favor of cannabis; <sup>b</sup> Due to imprecision.

**Supplement Table 10: Summary of adverse events among included observational studies\***

| Study                                 | Method of assessment                                   | Adverse events reported                                                                                                                                                                                                                                                                                                                                                                                                                                |
|---------------------------------------|--------------------------------------------------------|--------------------------------------------------------------------------------------------------------------------------------------------------------------------------------------------------------------------------------------------------------------------------------------------------------------------------------------------------------------------------------------------------------------------------------------------------------|
| <b>Haroutounian et al<sup>4</sup></b> | Self-reported.                                         | Two participants discontinued treatment due to serious side effects.                                                                                                                                                                                                                                                                                                                                                                                   |
| <b>Maida et al<sup>5</sup></b>        | Self-reported                                          | Anxiety (P=0.028), nausea (P<0.001), and distress (P=0.021) were decreased significantly among patients who used nabilone in comparison to patients who did not use it.                                                                                                                                                                                                                                                                                |
| <b>Narang et al<sup>6</sup></b>       | Self-reported (29-item symptom Side Effect Checklist). | <p><i>Phase II:</i> Dry mouth, tiredness (both P&lt;0.0001), abnormal thinking, anxiety, facial flushing, eye irritation, headache, and ringing in the ears, and drowsiness (P&lt;0.05) showed a significantly higher occurrence at the 20 mg dronabinol dose compared with placebo.</p> <p>-Dry mouth, difficulty speaking, forgetfulness, confusion, dizziness, and euphoria were more occurred in both treatment group versus placebo (P= 0.01)</p> |

|                                  |                |                                                                                                                                                                         |
|----------------------------------|----------------|-------------------------------------------------------------------------------------------------------------------------------------------------------------------------|
| <b>Vigil et al<sup>12</sup></b>  | Self-reported. | No respondents reported any serious side effects from cannabis use (only 9% of patients reported cannabis affected negatively their concentration).                     |
| <b>Yassin et al<sup>13</sup></b> | Self-reported  | Mostly mild adverse events were reported (e.g. red eye, sore throat, increase appetite); only 6 patients out of withdrew due to the side effects in non-cannabis group. |

\*O'Connell et al<sup>7</sup>, Barlowe et al<sup>1</sup>, Rod 2019, and Takakuwa et al<sup>11</sup> did not report adverse events.

Additional results tables and figures

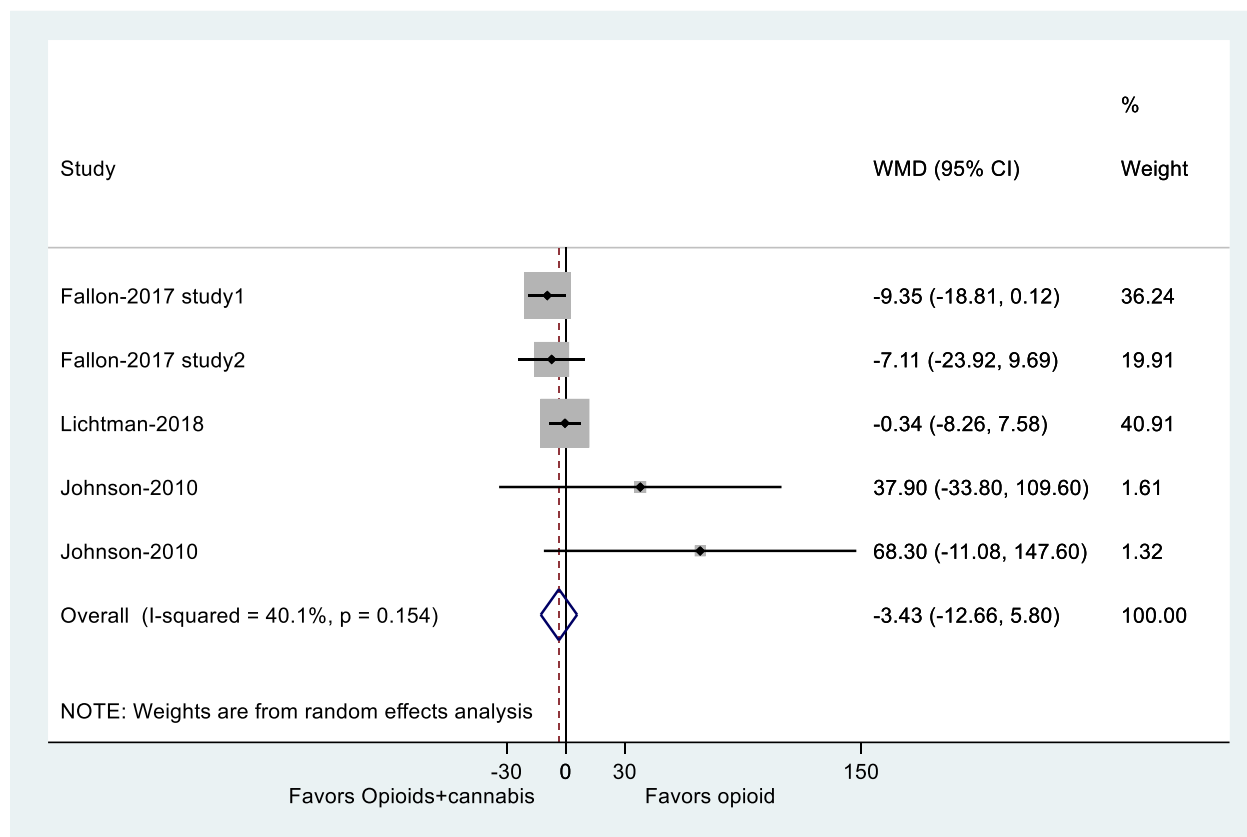

**Supplement Figure 1: forest plot for oral morphine equivalence dose reduction among patients with Chronic Pain who received cannabis adjuvant to opioids vs. opioid alone in RCTs**



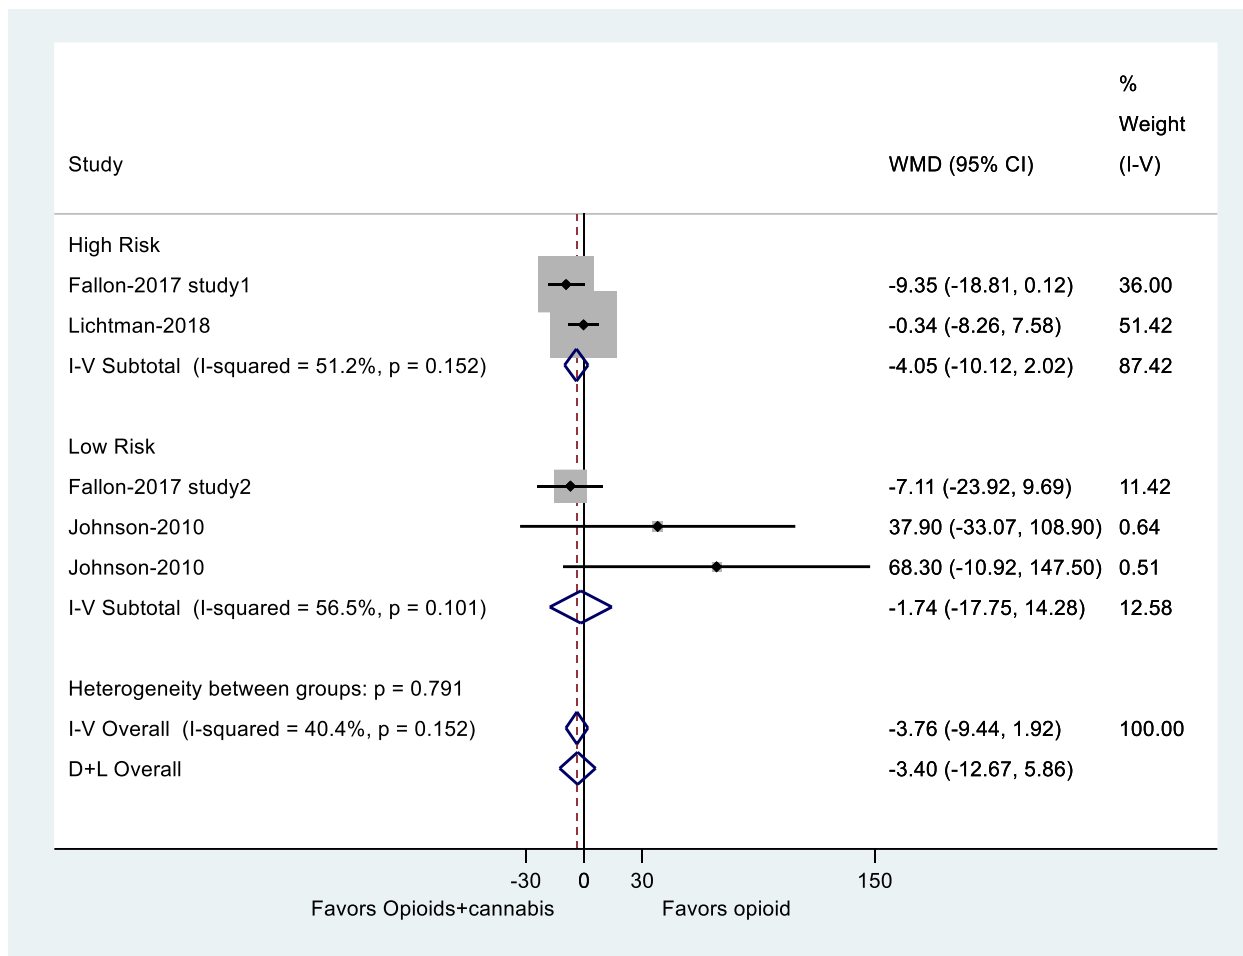

**Supplement Figure 2: Subgroup analysis for opioid dose reduction and risk of bias (high risk vs. low risk) from 4 RCTs of Cannabis+opioids vs. placebo**

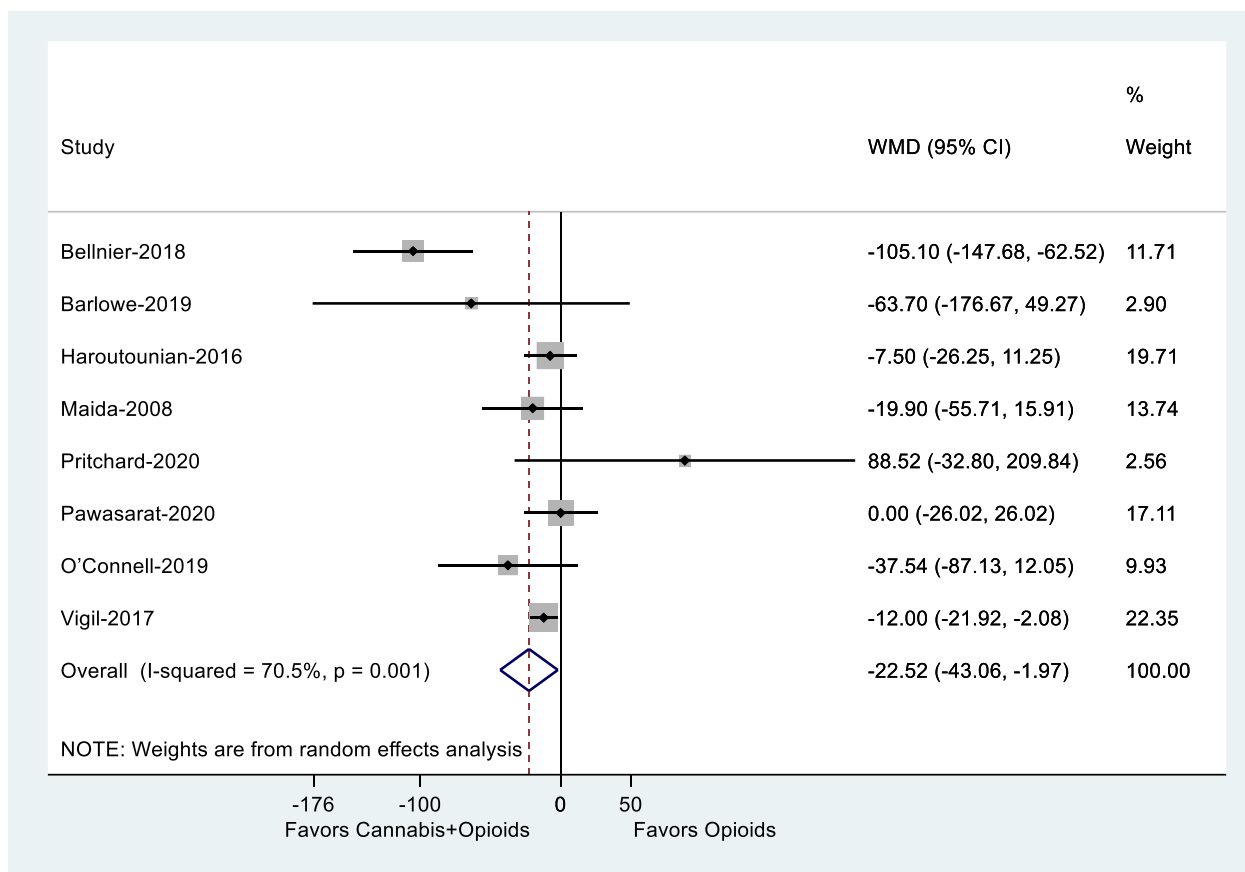

**Supplement Figure 3: forest plot for oral morphine equivalence dose reduction among patients with Chronic Pain who received cannabis adjuvant to opioids vs. opioid alone in observational studies**

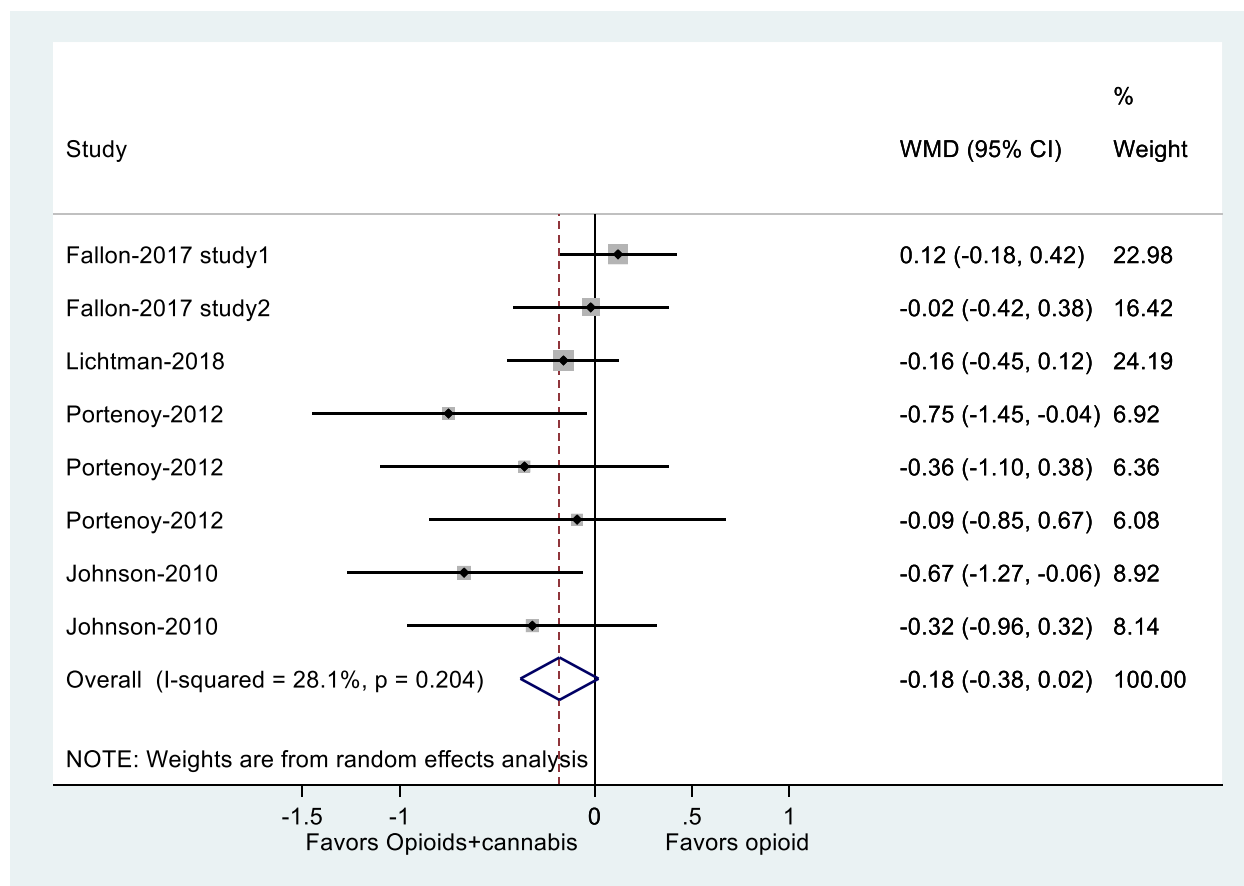

**Supplement Figure 4: forest plot for pain relief on a 10-cm Visual Analog Scale (VAS) among patients with Chronic Pain who received cannabis adjuvant to opioids vs. opioid alone in RCTs**

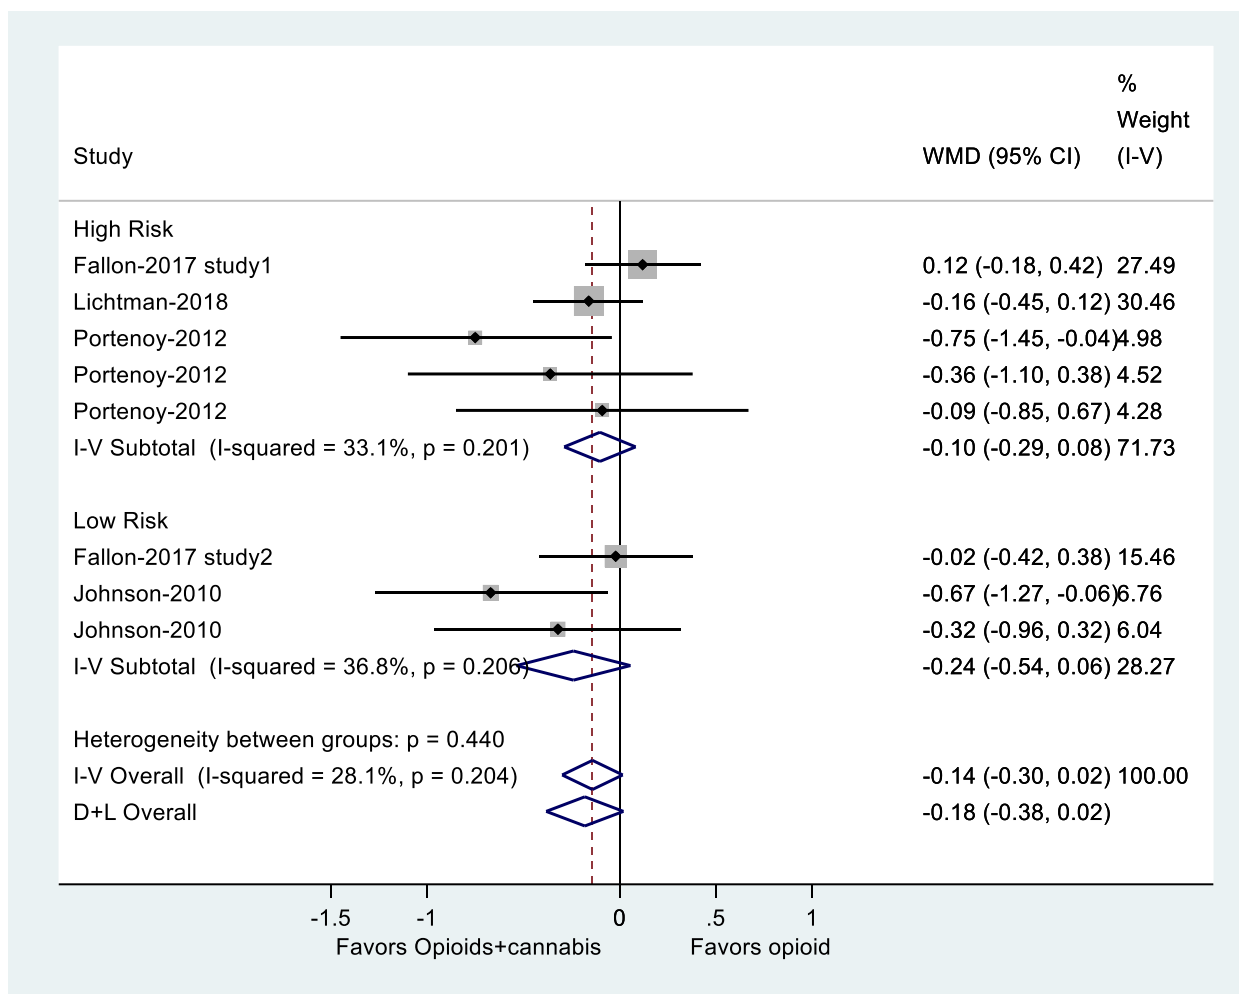

**Supplement Figure 5: Subgroup analysis for pain relief on a 10-cm VAS and risk of bias (high risk vs. low risk) from 5 RCTs of Cannabis+opioids vs. placebo**

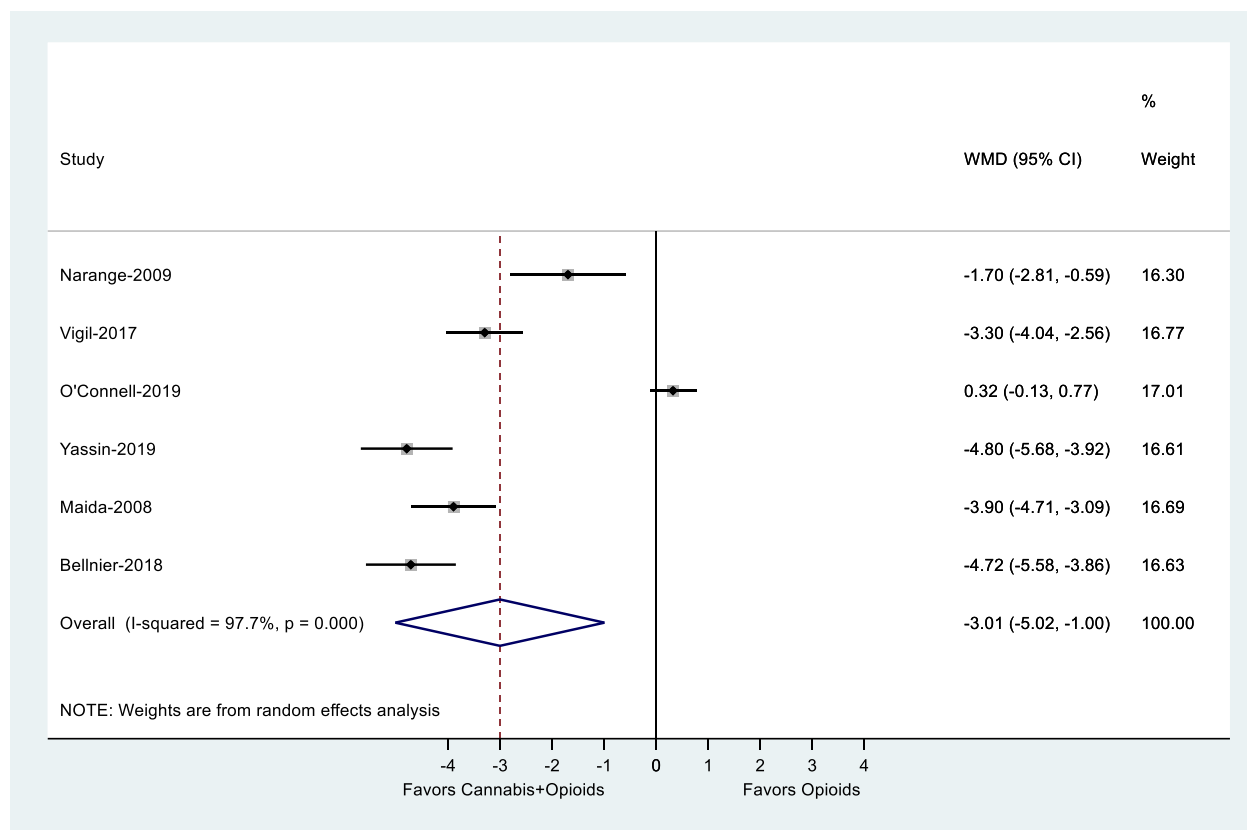

31  
32  
33  
34  
35  
36  
37  
38  
39  
40  
41  
42  
43  
44  
45  
46  
47  
48  
49  
50  
51  
52  
53  
54  
55  
56  
57  
58  
59  
60

**Supplement Figure 6: forest plot for pain relief on a 10-cm VAS among patients with Chronic Pain who received cannabis adjuvant to opioids vs. opioid alone in observational studies with no control group**

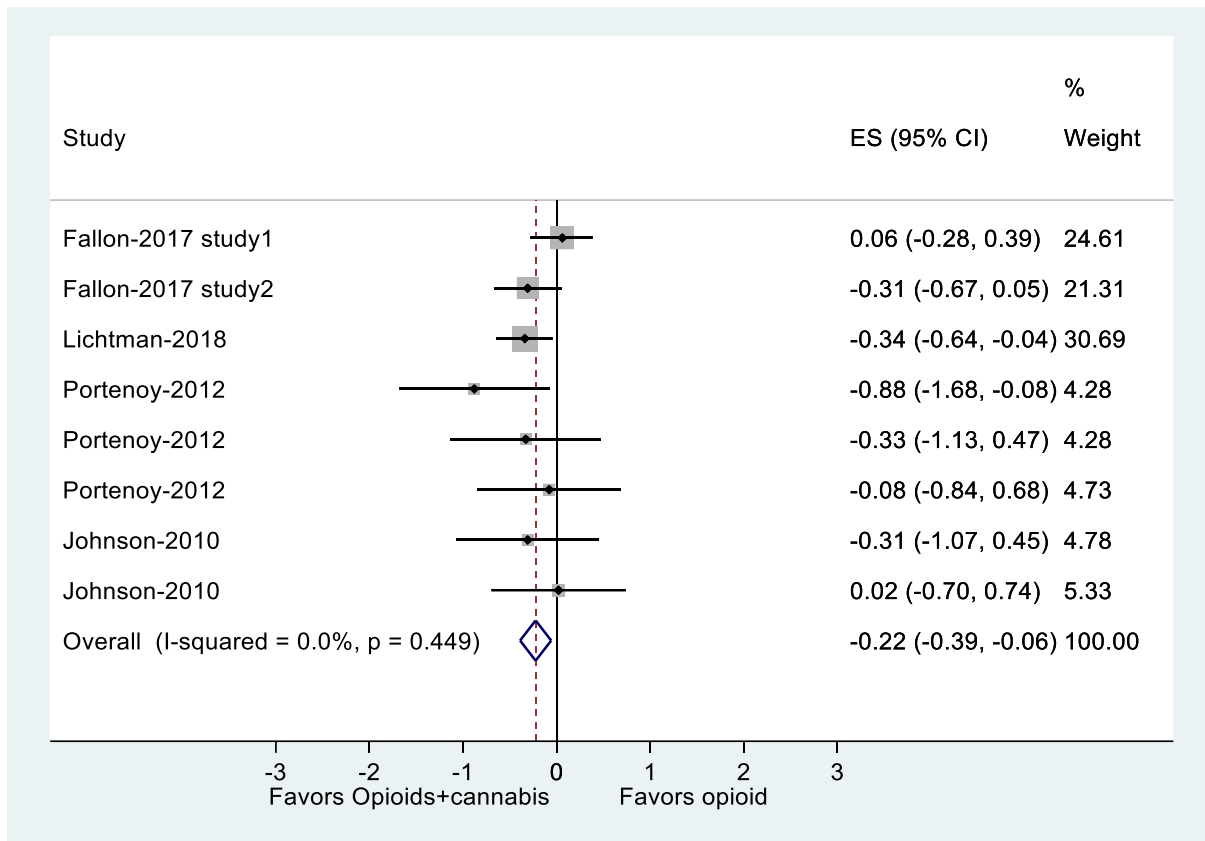

**Supplement Figure 7: forest plot for sleep disturbance on a 10 cm VAS for sleep disturbance among patients with Chronic Pain who received cannabis adjuvant to opioids vs. opioid alone in RCTs**

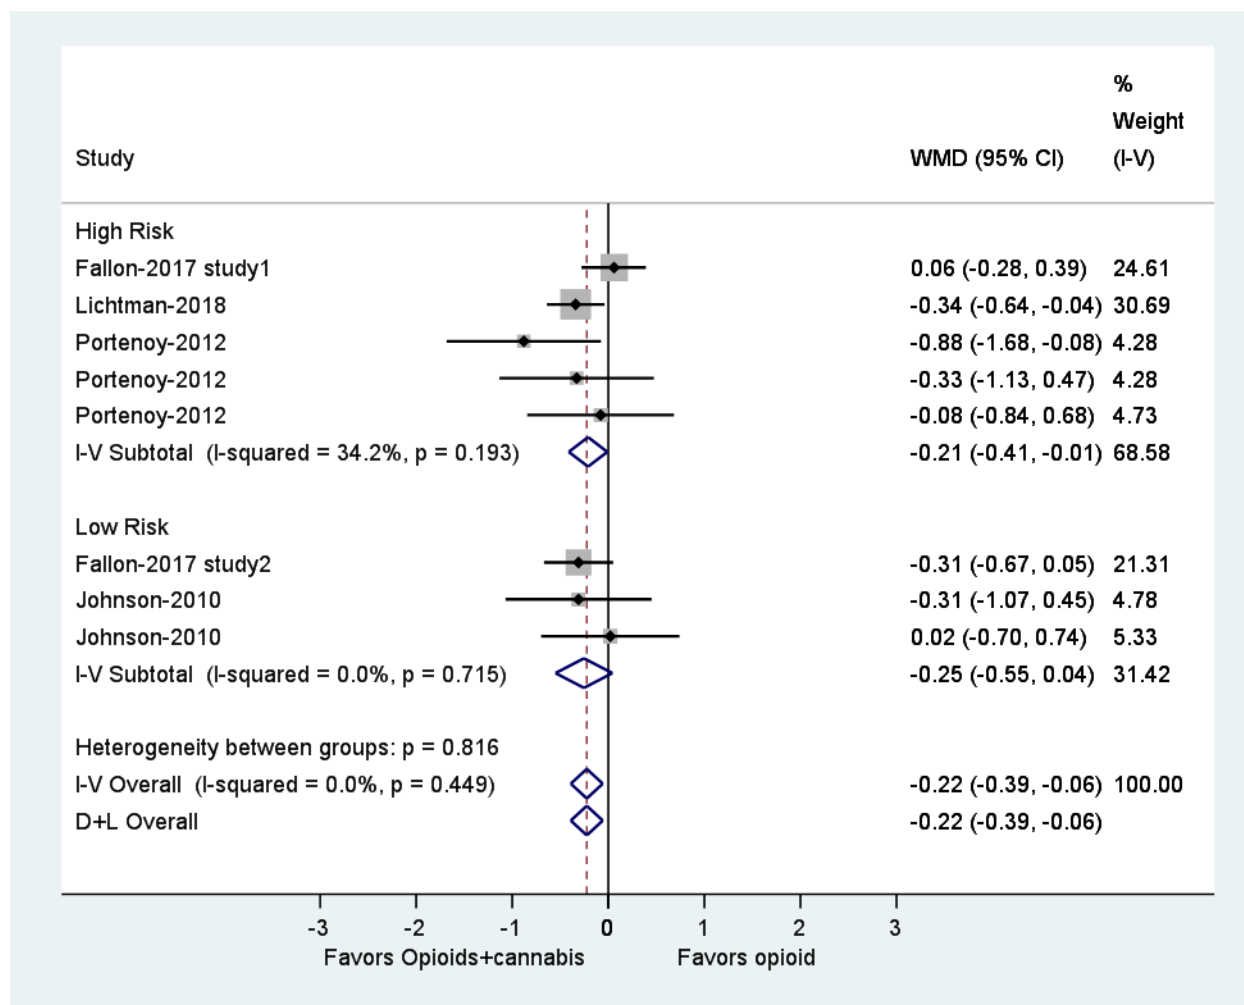

**Supplement Figure 8: Subgroup analysis for sleep disturbance a 10-cm VAS for sleep disturbance and risk of bias (high risk vs. low risk) from 5 RCTs of Cannabis+opioids vs. placebo**

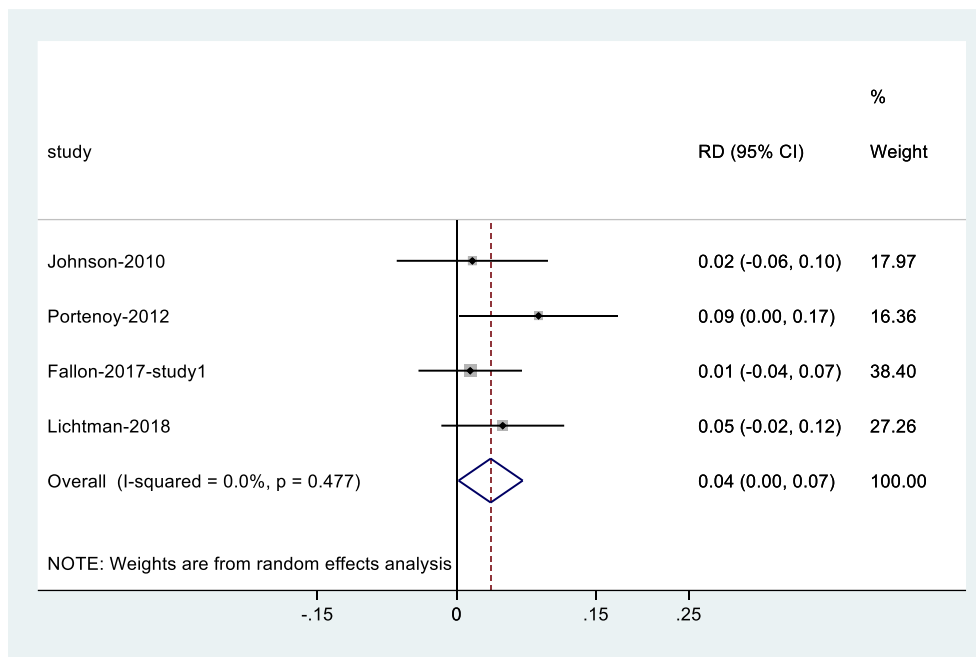

**Supplement Figure 9: Risk difference of nausea among patients with Chronic Pain who received cannabis adjuvant to opioids vs. opioid alone in RCTs**

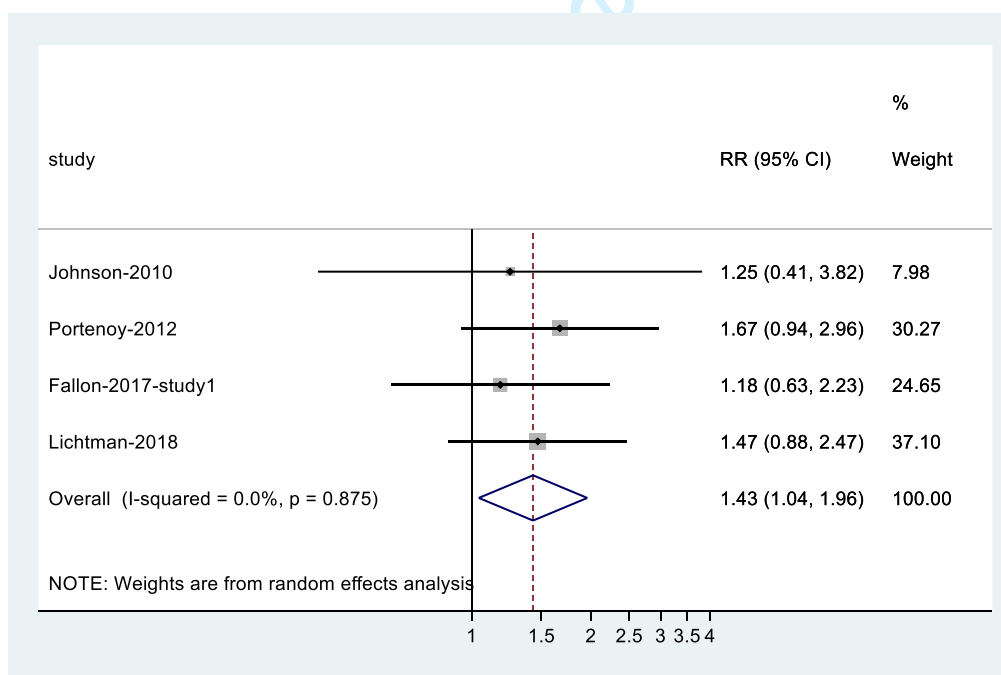

**Supplement Figure 10: Relative Risk of nausea among patients with Chronic Pain who received cannabis adjuvant to opioids vs. opioid alone in RCTs**



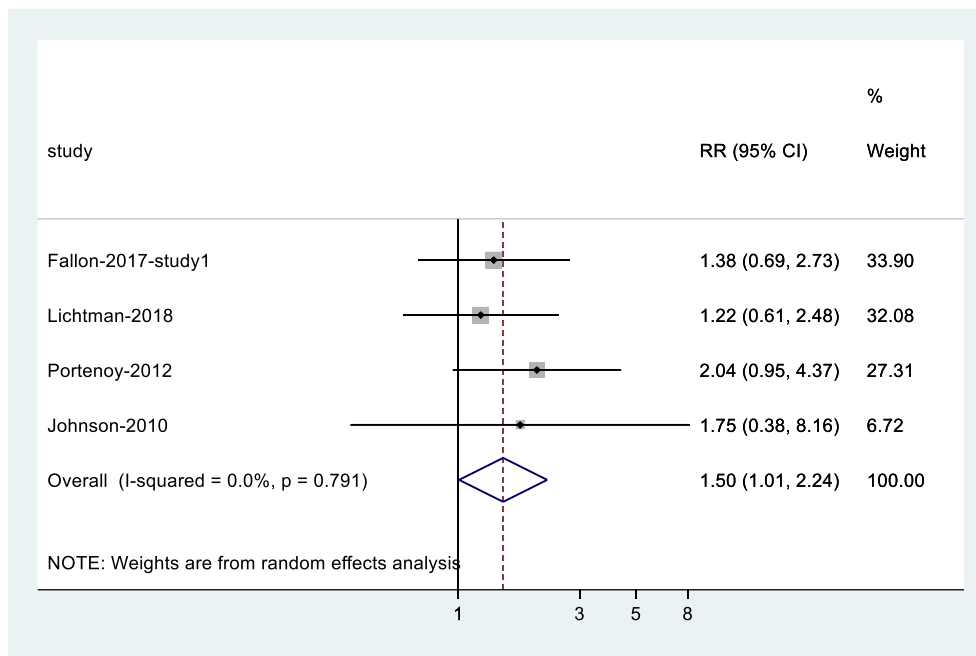

**Supplement Figure 11: Relative Risk of vomiting among patients with Chronic Pain who received cannabis adjuvant to opioids vs. opioid alone in RCTs**

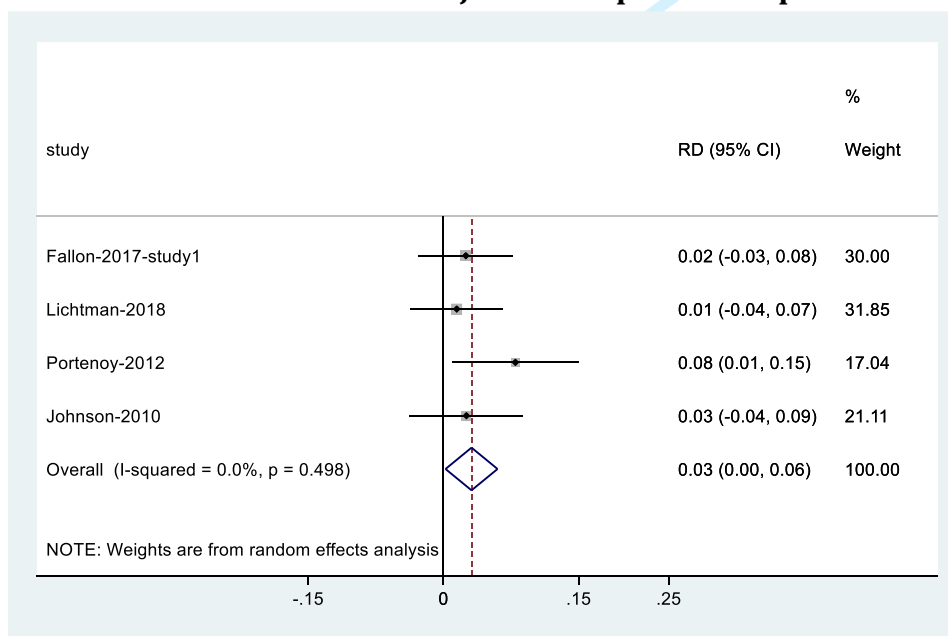

**Supplement Figure 12: Risk Difference of vomiting among patients with Chronic Pain who received cannabis adjuvant to opioids vs. opioid alone in RCTs**

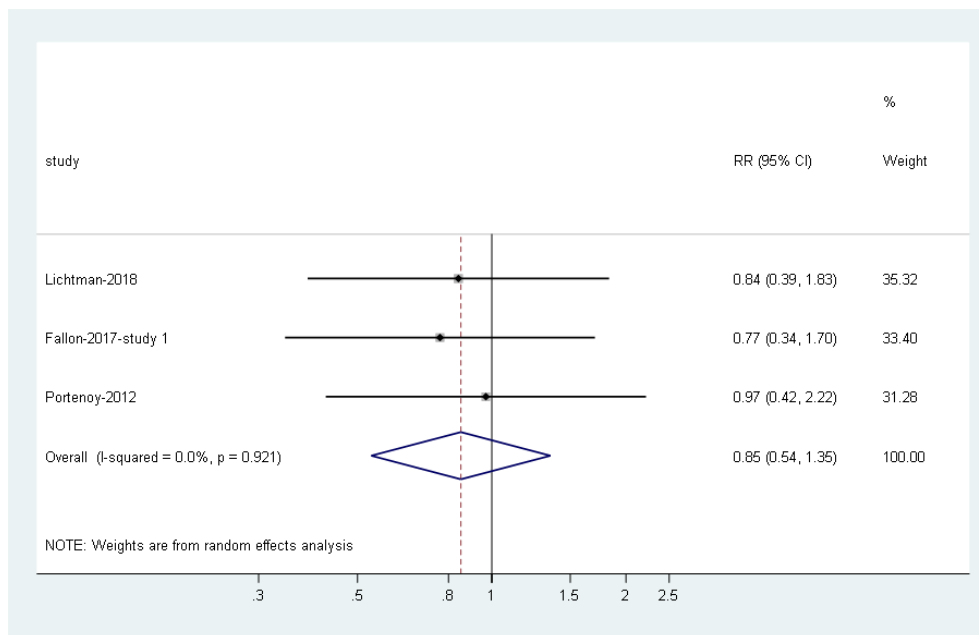

**Supplement Figure 13: Relative Risk of constipation among patients with Chronic Pain who received cannabis adjuvant to opioids vs. opioid alone in RCTs**

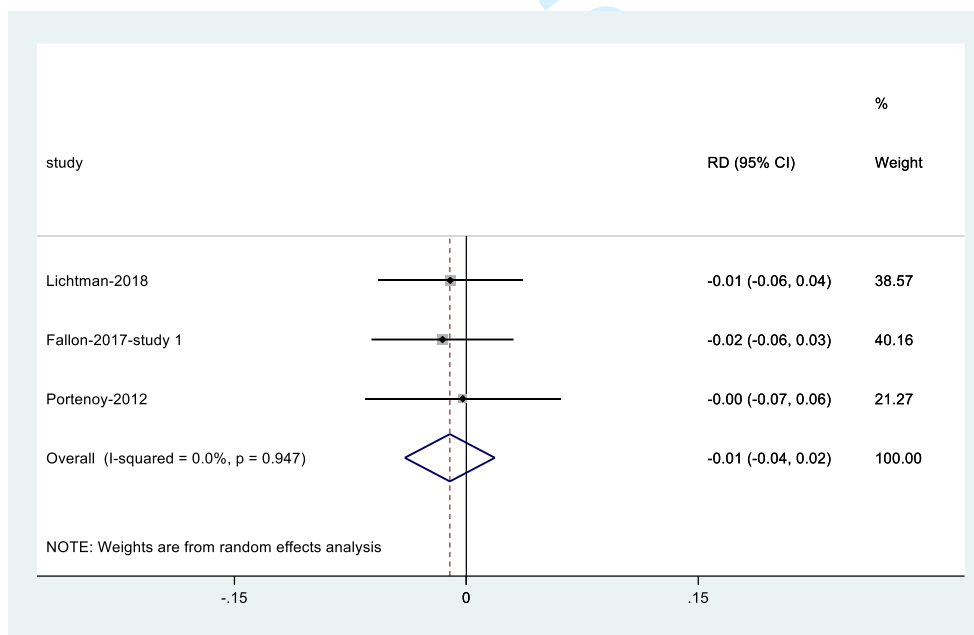

**Supplement Figure 14: Risk difference of constipation among patients with Chronic Pain who received cannabis adjuvant to opioids vs. opioid alone in RCTs**

## Appendix B: Reference List of Eligible studies

1. Barlowe TS, Koliani-Pace JL, Smith KD, Gordon SR, Gardner TB. Effects of medical cannabis on use of opioids and hospital visits by patients with painful chronic pancreatitis. *Clinical Gastroenterology and Hepatology* 2019.
2. Bellnier T, Brown GW, Ortega TR. Preliminary evaluation of the efficacy, safety, and costs associated with the treatment of chronic pain with medical cannabis. *Mental Health Clinician* 2018;8(3):110-5.
3. Capano A, Weaver R, Burkman E. Evaluation of the effects of CBD hemp extract on opioid use and quality of life indicators in chronic pain patients: a prospective cohort study. *Postgrad Med* 2020;132(1):56-61. doi:10.1080/00325481.2019.1685298.
4. Haroutounian S, Ratz Y, Ginosar Y, et al. The Effect of Medicinal Cannabis on Pain and Quality-of-Life Outcomes in Chronic Pain: A Prospective Open-label Study. *Clin J Pain* 2016;32(12):1036-43. doi:10.1097/ajp.0000000000000364.
5. Maida V, Ennis M, Irani S, Corbo M, Dolzhykov M. Adjunctive nabilone in cancer pain and symptom management: a prospective observational study using propensity scoring. *The journal of supportive oncology* 2008;6(3):119-24.
6. Narang S, Gibson D, Wasan AD, et al. Efficacy of dronabinol as an adjuvant treatment for chronic pain patients on opioid therapy. *J Pain* 2008;9(3):254-64. doi:10.1016/j.jpain.2007.10.018.
7. O'Connell M, Sandgren M, Frantzen L, Bower E, Erickson B. Medical Cannabis: Effects on Opioid and Benzodiazepine Requirements for Pain Control. *Annals of Pharmacotherapy* 2019:1060028019854221.
8. Pritchard ER, Dayer L, Belz J, et al. Effect of cannabis on opioid use in patients with cancer receiving palliative care. *J Am Pharm Assoc (2003)* 2020;60(1):244-7. doi:10.1016/j.japh.2019.10.013.
9. Pawasarat IM, Schultz EM, Frisby JC, et al. The Efficacy of Medical Marijuana in the Treatment of Cancer-Related Pain. *J Palliat Med* 2020;23(6):809-16. doi:10.1089/jpm.2019.0374.
10. Rod K. A Pilot Study of a Medical Cannabis - Opioid Reduction Program. *American Journal of Psychiatry and Neuroscience* 2019;7(3):74-7. doi:10.11648/j.ajpn.20190703.14
11. Takakuwa KM, Hergenrather JY, Shofer FS, Schears RM. The Impact of Medical Cannabis on Intermittent and Chronic Opioid Users with Back Pain: How Cannabis Diminished Prescription Opioid Usage. *Cannabis and Cannabinoid Research* 2020.
12. Vigil JM, Stith SS, Adams IM, Reeve AP. Associations between medical cannabis and prescription opioid use in chronic pain patients: A preliminary cohort study. *PLoS One* 2017;12(11):e0187795. doi:10.1371/journal.pone.0187795.
13. Yassin M, Oron A, Robinson D. Effect of adding medical cannabis to analgesic treatment in patients with low back pain related to fibromyalgia: an observational cross-over single centre study. *Clin Exp Rheumatol* 2019;37(Suppl 116):S13-S20.
14. Johnson JR, Burnell-Nugent M, Lossignol D, et al. Multicenter, double-blind, randomized, placebo-controlled, parallel-group study of the efficacy, safety, and tolerability of THC: CBD extract and THC extract in patients with intractable cancer-related pain. *Journal of pain and symptom management* 2010;39(2):167-79.
15. Portenoy RK, Ganae-Motan ED, Allende S, et al. Nabiximols for opioid-treated cancer patients with poorly-controlled chronic pain: a randomized, placebo-controlled, graded-dose trial. *The Journal of Pain* 2012;13(5):438-49.
16. Fallon MT, Albert Lux E, McQuade R, et al. Sativex oromucosal spray as adjunctive therapy in advanced cancer patients with chronic pain unalleviated by optimized opioid therapy: two double-blind, randomized, placebo-controlled phase 3 studies. *British journal of pain* 2017;11(3):119-33.
17. Lichtman AH, Lux EA, McQuade R, et al. Results of a double-blind, randomized, placebo-controlled study of nabiximols oromucosal spray as an adjunctive therapy in advanced cancer

1  
2  
3 patients with chronic uncontrolled pain. *Journal of pain and symptom management* 2018;55(2):179-  
4 88. e1.  
5  
6  
7  
8  
9  
10  
11  
12  
13  
14  
15  
16  
17  
18  
19  
20  
21  
22  
23  
24  
25  
26  
27  
28  
29  
30  
31  
32  
33  
34  
35  
36  
37  
38  
39  
40  
41  
42  
43  
44  
45  
46  
47  
48  
49  
50  
51  
52  
53  
54  
55  
56  
57  
58  
59  
60

For peer review only

## Technical Appendix

This appendix provides additional details on two different methods of estimation, including 1) estimating the mean and standard deviation (SD) from sample size, median, and interquartile range (IQR); 2) estimating missing SD (for two non-randomized studies<sup>5,7</sup>) using the available SD from other included studies.

### 1) Estimating the mean and standard deviation (SD) from sample size, median, and IQR:

1) Pawasarat et al 2020 original reported data: median total morphine equivalent=45, n=137, and IQR=135.

-Using Wan et al method<sup>1</sup> produced: mean=60, SD=101

-Method recommended by Cochrane as *sensitivity analysis*:

$$S \approx \frac{q_3 - q_1}{1.35}$$

q3-q1=IQR. This method produced SD=100.

2) Bellnier et al 2018 original reported data: median total morphine equivalent (before adding cannabis) =79.94, range=0 to 450, median (after adding cannabis) =19.65; range =0 to 150, n=29.

-Using Wan et al method produced: mean (before)=152.4, SD=111; mean (after)=47.3, SD=37.0

-Using Cochrane approach (Hozo et al<sup>3</sup>): Mean (before)= 152.4, SD= 112.5; mean (after)= 47.3, SD= 37.5

We finally included estimation by Wan et al method. The excel sheet including all formula was provided by Wan et al in supplementary file of their article<sup>1</sup>.

### 2) Estimating missing SD using the available SD from other included studies:

1) Maida et al 2008 did not report SD around the mean at the end of follow-up for pain intensity. Original reported data: mean (SD) before adding cannabis= 7.1(2.4); after adding cannabis mean=3 (missing)

2) Connell et al 2019 original reported data: mean (SD) before adding cannabis=6.25 (missing); mean after adding cannabis=6.57 (missing)

We imputed missing SDs for these two studies from the given SDs related to other five included studies using prognostic method that presented by Ma et al<sup>2</sup>:

$$SEM_j^* = \frac{\sum_{i=1}^k SEM_i \sqrt{n_i}}{k \sqrt{n_j^*}}$$

Assume there are  $k + 1$  trials altogether where  $k$  trials are with full given information

SEM: value for trial  $j$  (*missing*) with sample size:

$n_j$ : sample size for study with missing information.

SD (imputed) for first study= 1.51

SDs (imputed) for second study=1.76, 1.20

<sup>1</sup> Wan X, Wang W, Liu J, et al. Estimating the sample mean and standard deviation from the sample size, median, range and/or interquartile range. BMC medical research methodology 2014;**14**(1):135.

<sup>2</sup> Ma J, Liu W, Hunter A, et al. Performing meta-analysis with incomplete statistical information in clinical trials. BMC medical research methodology 2008;**8**(1):56.

<sup>3</sup> Hozo, S.P., Djulbegovic, B. & Hozo, I. Estimating the mean and variance from the median, range, and the size of a sample. BMC Med Res Methodol 5, 13 (2005). <https://doi.org/10.1186/1471-2288-5-13>

| Section/topic                      | #  | Checklist item                                                                                                                                                                                                                                                                                              | Reported on page # |
|------------------------------------|----|-------------------------------------------------------------------------------------------------------------------------------------------------------------------------------------------------------------------------------------------------------------------------------------------------------------|--------------------|
| <b>TITLE</b>                       |    |                                                                                                                                                                                                                                                                                                             |                    |
| Title                              | 1  | Identify the report as a systematic review, meta-analysis, or both.                                                                                                                                                                                                                                         | 1                  |
| <b>ABSTRACT</b>                    |    |                                                                                                                                                                                                                                                                                                             |                    |
| Structured summary                 | 2  | Provide a structured summary including, as applicable: background; objectives; data sources; study eligibility criteria, participants, and interventions; study appraisal and synthesis methods; results; limitations; conclusions and implications of key findings; systematic review registration number. | 3-4                |
| <b>INTRODUCTION</b>                |    |                                                                                                                                                                                                                                                                                                             |                    |
| Rationale                          | 3  | Describe the rationale for the review in the context of what is already known.                                                                                                                                                                                                                              | 5                  |
| Objectives                         | 4  | Provide an explicit statement of questions being addressed with reference to participants, interventions, comparisons, outcomes, and study design (PICOS).                                                                                                                                                  | 5                  |
| <b>METHODS</b>                     |    |                                                                                                                                                                                                                                                                                                             |                    |
| Protocol and registration          | 5  | Indicate if a review protocol exists, if and where it can be accessed (e.g., Web address), and, if available, provide registration information including registration number.                                                                                                                               | 6                  |
| Eligibility criteria               | 6  | Specify study characteristics (e.g., PICOS, length of follow-up) and report characteristics (e.g., years considered, language, publication status) used as criteria for eligibility, giving rationale.                                                                                                      | 6                  |
| Information sources                | 7  | Describe all information sources (e.g., databases with dates of coverage, contact with study authors to identify additional studies) in the search and date last searched.                                                                                                                                  | 6                  |
| Search                             | 8  | Present full electronic search strategy for at least one database, including any limits used, such that it could be repeated.                                                                                                                                                                               | 6                  |
| Study selection                    | 9  | State the process for selecting studies (i.e., screening, eligibility, included in systematic review, and, if applicable, included in the meta-analysis).                                                                                                                                                   | 7                  |
| Data collection process            | 10 | Describe method of data extraction from reports (e.g., piloted forms, independently, in duplicate) and any processes for obtaining and confirming data from investigators.                                                                                                                                  | 7                  |
| Data items                         | 11 | List and define all variables for which data were sought (e.g., PICOS, funding sources) and any assumptions and simplifications made.                                                                                                                                                                       | 7                  |
| Risk of bias in individual studies | 12 | Describe methods used for assessing risk of bias of individual studies (including specification of whether this was done at the study or outcome level), and how this information is to be used in any data synthesis.                                                                                      | 7-8                |
| Summary measures                   | 13 | State the principal summary measures (e.g., risk ratio, difference in means).                                                                                                                                                                                                                               | 8                  |
| Synthesis of results               | 14 | Describe the methods of handling data and combining results of studies, if done, including measures of consistency (e.g., $I^2$ ) for each meta-analysis.                                                                                                                                                   | 8                  |

| Section/topic | # | Checklist item | Reported on page # |
|---------------|---|----------------|--------------------|
|---------------|---|----------------|--------------------|

|    |                               |    |                                                                                                                                                                                                          |       |
|----|-------------------------------|----|----------------------------------------------------------------------------------------------------------------------------------------------------------------------------------------------------------|-------|
| 1  | Risk of bias across studies   | 15 | Specify any assessment of risk of bias that may affect the cumulative evidence (e.g., publication bias, selective reporting within studies).                                                             | 9     |
| 2  | Additional analyses           | 16 | Describe methods of additional analyses (e.g., sensitivity or subgroup analyses, meta-regression), if done, indicating which were pre-specified.                                                         | 9-10  |
| 3  | <b>RESULTS</b>                |    |                                                                                                                                                                                                          |       |
| 4  | <b>RESULTS</b>                |    |                                                                                                                                                                                                          |       |
| 5  | <b>RESULTS</b>                |    |                                                                                                                                                                                                          |       |
| 6  | Study selection               | 17 | Give numbers of studies screened, assessed for eligibility, and included in the review, with reasons for exclusions at each stage, ideally with a flow diagram.                                          | 11    |
| 7  | <b>RESULTS</b>                |    |                                                                                                                                                                                                          |       |
| 8  | Study characteristics         | 18 | For each study, present characteristics for which data were extracted (e.g., study size, PICOS, follow-up period) and provide the citations.                                                             | 11    |
| 9  | <b>RESULTS</b>                |    |                                                                                                                                                                                                          |       |
| 10 | Risk of bias within studies   | 19 | Present data on risk of bias of each study and, if available, any outcome level assessment (see item 12).                                                                                                | 12    |
| 11 | <b>RESULTS</b>                |    |                                                                                                                                                                                                          |       |
| 12 | Results of individual studies | 20 | For all outcomes considered (benefits or harms), present, for each study: (a) simple summary data for each intervention group (b) effect estimates and confidence intervals, ideally with a forest plot. | 12-14 |
| 13 | <b>RESULTS</b>                |    |                                                                                                                                                                                                          |       |
| 14 | Synthesis of results          | 21 | Present results of each meta-analysis done, including confidence intervals and measures of consistency.                                                                                                  | 12-14 |
| 15 | <b>RESULTS</b>                |    |                                                                                                                                                                                                          |       |
| 16 | Risk of bias across studies   | 22 | Present results of any assessment of risk of bias across studies (see Item 15).                                                                                                                          | 9     |
| 17 | <b>RESULTS</b>                |    |                                                                                                                                                                                                          |       |
| 18 | Additional analysis           | 23 | Give results of additional analyses, if done (e.g., sensitivity or subgroup analyses, meta-regression [see Item 16]).                                                                                    | 12-14 |
| 19 | <b>DISCUSSION</b>             |    |                                                                                                                                                                                                          |       |
| 20 | <b>DISCUSSION</b>             |    |                                                                                                                                                                                                          |       |
| 21 | Summary of evidence           | 24 | Summarize the main findings including the strength of evidence for each main outcome; consider their relevance to key groups (e.g., healthcare providers, users, and policy makers).                     | 15    |
| 22 | <b>DISCUSSION</b>             |    |                                                                                                                                                                                                          |       |
| 23 | Limitations                   | 25 | Discuss limitations at study and outcome level (e.g., risk of bias), and at review-level (e.g., incomplete retrieval of identified research, reporting bias).                                            | 15    |
| 24 | <b>DISCUSSION</b>             |    |                                                                                                                                                                                                          |       |
| 25 | Conclusions                   | 26 | Provide a general interpretation of the results in the context of other evidence, and implications for future research.                                                                                  | 16    |
| 26 | <b>FUNDING</b>                |    |                                                                                                                                                                                                          |       |
| 27 | <b>FUNDING</b>                |    |                                                                                                                                                                                                          |       |
| 28 | <b>FUNDING</b>                |    |                                                                                                                                                                                                          |       |
| 29 | Funding                       | 27 | Describe sources of funding for the systematic review and other support (e.g., supply of data); role of funders for the systematic review.                                                               | 17    |
| 30 | <b>FUNDING</b>                |    |                                                                                                                                                                                                          |       |
| 31 | <b>FUNDING</b>                |    |                                                                                                                                                                                                          |       |



# BMJ Open

## Opioid-Sparing effects of medical cannabis or cannabinoids for chronic pain: A systematic review and meta-analysis of randomized and observational studies

|                                 |                                                                                                                                                                                                                                                                                                                                                                                                                                                                                                                                                                                                                                                                                                                                                                                                                                                                                                                                                                                                                                                                                                                                                                                                                                                                                                                                                                                                                                                                                              |
|---------------------------------|----------------------------------------------------------------------------------------------------------------------------------------------------------------------------------------------------------------------------------------------------------------------------------------------------------------------------------------------------------------------------------------------------------------------------------------------------------------------------------------------------------------------------------------------------------------------------------------------------------------------------------------------------------------------------------------------------------------------------------------------------------------------------------------------------------------------------------------------------------------------------------------------------------------------------------------------------------------------------------------------------------------------------------------------------------------------------------------------------------------------------------------------------------------------------------------------------------------------------------------------------------------------------------------------------------------------------------------------------------------------------------------------------------------------------------------------------------------------------------------------|
| Journal:                        | <i>BMJ Open</i>                                                                                                                                                                                                                                                                                                                                                                                                                                                                                                                                                                                                                                                                                                                                                                                                                                                                                                                                                                                                                                                                                                                                                                                                                                                                                                                                                                                                                                                                              |
| Manuscript ID                   | bmjopen-2020-047717.R1                                                                                                                                                                                                                                                                                                                                                                                                                                                                                                                                                                                                                                                                                                                                                                                                                                                                                                                                                                                                                                                                                                                                                                                                                                                                                                                                                                                                                                                                       |
| Article Type:                   | Original research                                                                                                                                                                                                                                                                                                                                                                                                                                                                                                                                                                                                                                                                                                                                                                                                                                                                                                                                                                                                                                                                                                                                                                                                                                                                                                                                                                                                                                                                            |
| Date Submitted by the Author:   | 11-Jun-2021                                                                                                                                                                                                                                                                                                                                                                                                                                                                                                                                                                                                                                                                                                                                                                                                                                                                                                                                                                                                                                                                                                                                                                                                                                                                                                                                                                                                                                                                                  |
| Complete List of Authors:       | Noori, Atefeh; McMaster University, Department of Health Research Methods, Evidence, and Impact; McMaster University, The Michael G. DeGroot National Pain Center<br>Miroshnychenko, Anna; McMaster University, Department of Health Research Methods, Evidence, and Impact<br>Shergill, Yaadwinder; McMaster University, Department of Health Research Methods, Evidence, and Impact<br>Ashoorion, Vahid; McMaster University, Department of Health Research Methods, Evidence, and Impact<br>Rehman, Yasir ; McMaster University, Department of Health Research Methods, Evidence, and Impact<br>Couban, Rachel; McMaster University, The Michael G. DeGroot National Pain Center<br>Buckley, D; McMaster University, Department of Anesthesia<br>Thabane, Lehana; McMaster University, 1. Department of Health Research Methods, Evidence, and Impact<br>Bhandari, Mohit; McMaster University, Division of Orthopaedic Surgery, Department of Surgery; McMaster University, Department of Health Research Methods, Evidence, and Impact<br>Guyatt, Gordon; McMaster University, Department of Health Research Methods, Evidence, and Impact,<br>Agoritsas, Thomas; University of Geneva Faculty of Medicine, Division of of General Internal Medicine; McMaster University, Department of Health Research Methods, Evidence, and Impact<br>Busse, Jason; McMaster University, Department of Anesthesia; McMaster University, Department of Health Research Methods, Evidence, and Impact, |
| <b>Primary Subject Heading</b>: | General practice / Family practice                                                                                                                                                                                                                                                                                                                                                                                                                                                                                                                                                                                                                                                                                                                                                                                                                                                                                                                                                                                                                                                                                                                                                                                                                                                                                                                                                                                                                                                           |
| Secondary Subject Heading:      | Anaesthesia                                                                                                                                                                                                                                                                                                                                                                                                                                                                                                                                                                                                                                                                                                                                                                                                                                                                                                                                                                                                                                                                                                                                                                                                                                                                                                                                                                                                                                                                                  |
| Keywords:                       | PAIN MANAGEMENT, Cancer pain < ONCOLOGY, GENERAL MEDICINE (see Internal Medicine)                                                                                                                                                                                                                                                                                                                                                                                                                                                                                                                                                                                                                                                                                                                                                                                                                                                                                                                                                                                                                                                                                                                                                                                                                                                                                                                                                                                                            |
|                                 |                                                                                                                                                                                                                                                                                                                                                                                                                                                                                                                                                                                                                                                                                                                                                                                                                                                                                                                                                                                                                                                                                                                                                                                                                                                                                                                                                                                                                                                                                              |

1  
2  
3  
4  
5  
6  
7  
8  
9  
10  
11  
12  
13  
14  
15  
16  
17  
18  
19  
20  
21  
22  
23  
24  
25  
26  
27  
28  
29  
30  
31  
32  
33  
34  
35  
36  
37  
38  
39  
40  
41  
42  
43  
44  
45  
46  
47  
48  
49  
50  
51  
52  
53  
54  
55  
56  
57  
58  
59  
60

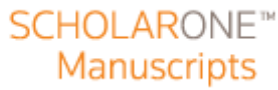



I, the Submitting Author has the right to grant and does grant on behalf of all authors of the Work (as defined in the below author licence), an exclusive licence and/or a non-exclusive licence for contributions from authors who are: i) UK Crown employees; ii) where BMJ has agreed a CC-BY licence shall apply, and/or iii) in accordance with the terms applicable for US Federal Government officers or employees acting as part of their official duties; on a worldwide, perpetual, irrevocable, royalty-free basis to BMJ Publishing Group Ltd ("BMJ") its licensees and where the relevant Journal is co-owned by BMJ to the co-owners of the Journal, to publish the Work in this journal and any other BMJ products and to exploit all rights, as set out in our [licence](#).

The Submitting Author accepts and understands that any supply made under these terms is made by BMJ to the Submitting Author unless you are acting as an employee on behalf of your employer or a postgraduate student of an affiliated institution which is paying any applicable article publishing charge ("APC") for Open Access articles. Where the Submitting Author wishes to make the Work available on an Open Access basis (and intends to pay the relevant APC), the terms of reuse of such Open Access shall be governed by a Creative Commons licence – details of these licences and which [Creative Commons](#) licence will apply to this Work are set out in our licence referred to above.

Other than as permitted in any relevant BMJ Author's Self Archiving Policies, I confirm this Work has not been accepted for publication elsewhere, is not being considered for publication elsewhere and does not duplicate material already published. I confirm all authors consent to publication of this Work and authorise the granting of this licence.

1  
2  
3 **Opioid-Sparing effects of medical cannabis or cannabinoids for chronic pain: A systematic**  
4 **review and meta-analysis of randomized and observational studies**  
5  
6  
7

8  
9 Atefeh Noori *PhD candidate*<sup>1,2</sup>, Anna Miroshnychenko *M.Sc. (Cand.)*<sup>1</sup>, Yaadwinder Shergill  
10 *M.Sc. (Cand.)*<sup>1</sup>, Vahid Ashoorion *PhD*<sup>1</sup>, Yasir Rehman *PhD candidate*<sup>1</sup>, Rachel Couban *medical*  
11 *librarian*<sup>2</sup>, Norman Buckley *professor*<sup>3</sup>, Lehana Thabane *professor*<sup>1</sup>, Mohit Bhandari  
12 *professor*<sup>1,4</sup>, Gordon H. Guyatt *distinguished professor*<sup>1</sup>, Thomas Agoritsas *assistant professor*  
13 <sup>1,5</sup>, Jason W. Busse *associate professor*<sup>6,7\*</sup>  
14  
15  
16  
17  
18

19 **Affiliations**

- 20  
21 1. Department of Health Research Methods, Evidence, and Impact, McMaster University,  
22 Hamilton, ON, Canada  
23 2. The Michael G. DeGroote National Pain Center, McMaster University, Hamilton, ON,  
24 Canada  
25 3. Department of Anesthesia, McMaster University, Hamilton, ON, Canada  
26 4. Division of Orthopaedic Surgery, Department of Surgery, McMaster University, Hamilton,  
27 ON, Canada  
28 5. Division of of General Internal Medicine, Department of Medicine, University Hospitals  
29 of Geneva, Geneva, Switzerland  
30 6. The Chronic Pain Centre of Excellence for Canadian Veterans, Hamilton, ON, Canada  
31 7. The Michael G. DeGroote Centre for Medicinal Cannabis Research, McMaster University,  
32 Hamilton, ON, Canada  
33  
34

35 **Corresponding Author:** Jason W. Busse, Michael G. DeGroote Centre for Medicinal Cannabis  
36 Research, McMaster University, HSC-2V9, 1280 Main St. West, Hamilton, Canada, L8S 4K1;  
37 email: [bussejw@mcmaster.ca](mailto:bussejw@mcmaster.ca)  
38  
39  
40  
41  
42  
43  
44  
45  
46  
47  
48  
49  
50  
51  
52  
53  
54  
55  
56  
57  
58  
59  
60

## ABSTRACT

**Objective:** To assess the efficacy and harms of adding medical cannabis to prescription opioids among people living with chronic pain.

**Design:** Systematic review.

**Data sources:** CENTRAL, EMBASE, and MEDLINE.

**Main outcomes and measures:** Opioid dose reduction, pain relief, sleep disturbance, physical and emotional functioning, and adverse events.

**Study selection criteria and methods:** We included studies that enrolled patients with chronic pain receiving prescription opioids and explored the impact of adding medical cannabis. We used GRADE to assess the certainty of evidence for each outcome.

**Results:** Eligible studies included five randomized trials (all enrolling chronic cancer-pain patients) and 12 observational studies. All randomized trials instructed participants to maintain their opioid dose, which resulted in a very low certainty evidence that adding cannabis has little or no impact on opioid use (weighted mean difference [WMD] -3.4 milligram morphine equivalent [MME]; 95% confidence interval [CI] -12.7 to 5.8). Randomized trials provided high certainty evidence that cannabis addition had little or no effect on pain relief (WMD -0.18cm; 95%CI -0.38 to 0.02; on a 10 cm VAS for pain) or sleep disturbance (WMD -0.22 cm; 95%CI -0.4 to -0.06; on a 10 cm VAS for sleep disturbance; minimally important difference [MID] is 1 cm) among chronic cancer-pain patients. Addition of cannabis likely increases nausea (relative risk [RR] 1.43; 95%CI 1.04 to 1.96; risk difference [RD] 4%, 95%CI 0% to 7%) and vomiting (RR 1.5; 95%CI 1.01 to 2.24; RD 3%; 95%CI 0% to 6%) (both moderate certainty) and may have no effect on constipation (RR 0.85; 95%CI 0.54 to 1.35; RD -1%; 95%CI -4% to 2%) (low

1  
2  
3 certainty). Eight observational studies provided very-low certainty evidence that adding cannabis  
4 reduced opioid use (WMD -22.5 MME; 95%CI -43.06 to -1.97).  
5  
6

7  
8 **Conclusion:** Opioid-sparing effects of medical cannabis for chronic pain remain uncertain due to  
9 very-low certainty evidence.  
10  
11  
12

13  
14  
15 **Systematic review registration** PROSPERO CRD42018091098  
16

17  
18  
19 **Funding Source:** This review received no external funding or other support  
20  
21

22  
23  
24 **Keywords:** chronic pain; opioids; cannabis; cannabinoids; drug substitution; sparing effect;  
25 tapering  
26  
27  
28  
29  
30  
31  
32  
33  
34  
35  
36  
37  
38  
39  
40  
41  
42  
43  
44  
45  
46  
47  
48  
49  
50  
51  
52  
53  
54  
55  
56  
57  
58  
59  
60

### Strengths and limitations of this study

- This is the first meta-analysis to pool the results of randomized controlled trials (RCTs) and observational studies exploring the opioid-sparing effects of medical cannabis among people living with chronic pain.
- We conducted a comprehensive search for eligible studies, appraised the risk of bias of included studies, and evaluated the certainty of evidence using the GRADE approach.
- Most observational studies incorporated inadequate adjustment for confounding, and all randomized trials, despite reporting this outcome, were not designed to address the effect of medical cannabis on opioid use.

## Introduction

Chronic pain affects approximately one in five adults and is a common reason for seeking medical care.<sup>1,2</sup> Opioids are commonly prescribed for this condition, particularly in North America;<sup>3</sup> however, they only provide benefit to a minority of patients. A 2018 systematic review of 96 trials found high certainty evidence that, versus placebo, opioids provide important pain relief ( $\geq 1$  cm improvement on a 10-cm visual analog scale for pain) to 12% of patients for whom they are prescribed.<sup>4</sup> Moreover, opioids are associated with harms such as overdose and death,<sup>5,6</sup> which are dose-dependent.<sup>7-10</sup> As a result, there is considerable interest in therapies that may allow patients with chronic pain using opioid therapy to reduce their opioid intake.

One promising approach is adding cannabis therapy, which low certainty evidence suggests may be similarly effective to opioids for reducing pain and improving physical functioning among people living with chronic pain.<sup>4</sup> Experimental studies have shown that opioids and cannabis have similar signal transduction systems,<sup>11</sup> and observational studies in the US demonstrated that the rates of opioid-related mortality reduced after cannabis was legalized.<sup>12-14</sup> Between 64% and 77% of patients with chronic pain responding to cross-sectional surveys reported a reduction in long-term opioid use after adding medical cannabis to their treatment.<sup>15,16</sup> A 2017 systematic review concluded that pre-clinical studies provided robust evidence for the opioid-sparing effects of cannabis.<sup>17</sup> To clarify the issue, we undertook a systematic review of randomized controlled trials and observational studies to explore the impact of adding medical cannabis on opioid dose, other patient-important outcomes, and related harms in patients with chronic pain using prescribed opioid therapy.

This systematic review is part of the BMJ Rapid Recommendations project, a collaborative effort from the MAGIC Evidence Ecosystem Foundation



1  
2  
3 (www.magicevidnece.org) and BMJ. This systematic review informed a parallel guideline  
4  
5 published on BMJ.com<sup>18</sup> and MAGICapp (<https://app.magicapp.org/#/guideline/jMMYPj>).  
6  
7  
8  
9  
10  
11  
12  
13  
14  
15  
16  
17  
18  
19  
20  
21  
22  
23  
24  
25  
26  
27  
28  
29  
30  
31  
32  
33  
34  
35  
36  
37  
38  
39  
40  
41  
42  
43  
44  
45  
46  
47  
48  
49  
50  
51  
52  
53  
54  
55  
56  
57  
58  
59  
60

For peer review only

## METHODS

We followed standards for meta-analysis of observational studies in epidemiology (MOOSE)<sup>19</sup> and preferred reporting items for systematic reviews and meta-analyses (PRISMA) guidelines<sup>20</sup> and registered our review (PROSPERO Identifier: CRD42018091098).

### Eligibility criteria

We included randomized controlled trials (RCTs) and observational studies, including cohort studies and case-control studies, in any language, that explored the impact of adding medical cannabis (i.e. phytocannabinoids, endocannabinoids, or synthetic cannabinoids) on the use of prescription opioids among people living with chronic pain. We defined pain as chronic if patients reported that symptoms had persisted for  $\geq 3$  months.<sup>21</sup> We excluded editorials, letters to the editor, pre-clinical studies, conference abstracts, case reports, case series, cross-sectional studies, and studies with less than 2-weeks follow-up. We also excluded studies of recreational cannabis use as these products typically contain much higher amounts of the psychotropic cannabinoid tetrahydrocannabinol (THC) than would be administered for therapeutic purposes.<sup>22</sup> <sup>23</sup> We classified observational study designs according to recommendations by the Cochrane Observational Studies Methods Group.<sup>24</sup>

### Literature search and study selection

We searched the Cochrane Central Register of Controlled Trials (CENTRAL), EMBASE, and MEDLINE from inception to March 2020 with no restriction on language of publication. An experienced medical librarian (RC) developed our database-specific search strategies (Appendix A). We also searched the ClinicalTrials.gov registry to identify ongoing trials, and reference lists of all eligible studies and related systematic reviews for additional eligible studies. Two teams of

1  
2  
3 paired reviewers independently screened titles, abstracts and full-text studies for eligibility using  
4  
5 online systematic review software (Rayyan QCRI, Qatar Computing Research Institute).  
6

7  
8 Reviewers resolved disagreements through discussion.  
9

## 10 11 12 **Data collection**

13  
14 Using standardized forms and a detailed instruction manual, pairs of reviewers independently  
15  
16 abstracted data from each eligible study, including study and patient characteristics, and details  
17  
18 of treatment (e.g. dose, formulation, and duration of cannabis add-on therapy). Our primary  
19  
20 outcome was opioid dose. We also captured all patient-important outcomes, as guided by the  
21  
22 Initiative on Methods, Measurement, and Pain Assessment in Clinical Trials,<sup>25</sup> including pain  
23  
24 relief, sleep disturbance, physical and emotional functioning. Regarding adverse events, we  
25  
26 focused on vomiting, nausea, and constipation as a systematic review of values and preferences<sup>26</sup>  
27  
28 demonstrated that patients living with chronic pain experience gastrointestinal complaints as the  
29  
30 most important opioid-induced adverse events. We contacted authors to obtain unpublished data.  
31  
32  
33  
34  
35  
36  
37

## 38 **Risk of bias assessment**

39  
40 Following training and calibration exercises two independent reviewers used a modified  
41  
42 Cochrane risk of bias tool<sup>27, 28</sup> to assess the risk of bias among eligible RCTs according to the  
43  
44 following domains: allocation concealment, blinding of participants, study personnel, outcome  
45  
46 assessors and data analyst, and loss to follow-up ( $\geq 20\%$  missing data was assigned high risk of  
47  
48 bias). Response options for each item were 'definitely or probably yes' (assigned a low risk of  
49  
50 bias) and 'definitely or probably no' (assigned a high risk of bias). (Supplement Table 1) We used  
51  
52 criteria suggested by the CLARITY group<sup>29</sup> to assess the risk of bias of observational studies  
53  
54  
55  
56  
57  
58  
59  
60

1  
2  
3 including selection bias, confidence that all patients had the condition of interest, control for  
4  
5 confounding variables, validity of outcome assessment(s), and infrequent missing data (<20%)  
6  
7 (details available at [www.evidencepartners.com/resources/methodological-resources/](http://www.evidencepartners.com/resources/methodological-resources/)).  
8  
9  
10 (Supplement Tables 2-3).

### 14 **Data analysis**

15  
16  
17 We calculated inter-rater agreement regarding the eligibility of full-text studies using an adjusted  
18  
19 kappa ( $\kappa$ ) statistic.<sup>30</sup> We conducted separate analyses for randomized controlled trials and  
20  
21 observational studies. All continuous measures for pain intensity and sleep disturbance were  
22  
23 converted to a 10 cm visual analogue scale (VAS); the minimally important difference (MID) for  
24  
25 both was 1 cm.<sup>31, 32</sup> All continuous outcomes that were reported by more than one study were  
26  
27 pooled to derive the weighted mean difference (WMD) and associated 95% confidence interval  
28  
29 (95% CI). We pooled binary outcomes (adverse events) as relative risks (RRs) and risk  
30  
31 differences (RDs) and their associated 95% CIs. We conducted all meta-analyses with random-  
32  
33 effects models and the DerSimonian-Laird method.<sup>33</sup>

34  
35  
36  
37  
38 When studies reported effects on continuous outcomes as the median and interquartile  
39  
40 range, we derived the mean and SD using the method presented by Wan *et al.*<sup>34</sup> We also  
41  
42 converted medians to means using the approach recommended by the Cochrane Handbook as a  
43  
44 sensitivity analysis. When authors failed to report a measure of precision associated with mean  
45  
46 differences, we imputed the SD from eligible studies that reported these measures (Technical  
47  
48 appendix).<sup>35</sup> We included each comparison reported by multi-arm studies and calculated a  
49  
50 correction factor to account for the unit of analysis error (i.e. when information from a treatment  
51  
52 arm is used more than once in the same meta-analysis).<sup>36</sup> We explored the consistency of  
53  
54  
55  
56  
57  
58  
59  
60

1  
2  
3 association between our pooled results and studies reporting the same outcome domains that  
4 were not possible to pool. We used Stata (StataCorp, Release 15.1, College Station, Texas) for  
5  
6 all analyses. Comparisons were 2-tailed using a threshold of  $p \leq 0.05$ .  
7  
8  
9

### 10 11 12 **Subgroup analyses and meta-regression** 13

14 We examined heterogeneity among pooled RCTs using the  $I^2$  statistic, and through visual  
15 inspection of forest plots for pooled observational data, because statistical tests of heterogeneity  
16 can be misleading when sample sizes are large and associated confidence intervals are therefore  
17 narrow.<sup>37</sup> When we had at least two studies in each subgroup, we explored sources of  
18 heterogeneity with five pre-specified subgroup hypotheses, assuming greater benefits with: (1)  
19 shorter vs. longer duration of follow-up; (2) higher vs. lower risk of bias; (3) enriched vs non-  
20 enriched study design; (4) chronic non-cancer vs. chronic cancer-related pain; and (5) higher vs  
21 lower tetrahydrocannabinol [THC] content. We assumed similar directions of subgroup effects  
22 for harms, except for study design and THC content in which we expected greater harms with  
23 non-enriched trials and higher THC content. However, apart from item two (risk of bias), studies  
24 did not report sufficient data to undertake subgroup analyses.  
25  
26  
27  
28  
29  
30  
31  
32  
33  
34  
35  
36  
37  
38  
39  
40  
41

### 42 **The certainty of the evidence** 43

44 We used the Grading of Recommendations Assessment, Development and Evaluation (GRADE)  
45 approach to assess the certainty of evidence on an outcome-by-outcome basis as high, moderate,  
46 low or very low.<sup>38</sup> With GRADE, RCTs begin as high-certainty evidence, but can be rated down  
47 because of risk of bias, imprecision, inconsistency, indirectness, or publication bias. We rated  
48 down for imprecision if the 95% CI associated with a pooled continuous outcome included  $\frac{1}{2}$  the  
49  
50  
51  
52  
53  
54  
55  
56  
57  
58  
59  
60

1  
2  
3 MID, or if the estimate of precision associated with the RR for binary outcomes included no  
4  
5 effect. We considered an  $I^2$  value between 75% and 100% to represent considerable  
6  
7 inconsistency.<sup>39</sup> We rated down the certainty of evidence for indirectness if there were important  
8  
9 differences between our research question and the patients enrolled, intervention tested, or  
10  
11 outcomes reported among studies contributing to our meta-analyses.<sup>40</sup>  
12  
13

14  
15 Using GRADE, observational studies begin as low certainty evidence, and while they can  
16  
17 be rated down further for the same reasons as RCTs, they can also be rated up in the presence of  
18  
19 a large magnitude of the effect, a dose-response gradient, or consideration of plausible  
20  
21 confounders or other biases that increase confidence in the estimated effect.<sup>41</sup> We only reported  
22  
23 the pooling results of observational studies when they resulted in the same or higher certainty of  
24  
25 evidence than evidence from RCTs. When there were at least 10 studies for meta-analysis, we  
26  
27 explored for small-study effects by visual assessment of funnel plot asymmetry and Egger's  
28  
29 statistical test.<sup>42</sup>  
30  
31  
32  
33  
34

### 35 **Patients and public involvement**

36  
37 Patients and public were not involved in this research.  
38  
39  
40  
41  
42  
43  
44  
45  
46  
47  
48  
49  
50  
51  
52  
53  
54  
55  
56  
57

## RESULTS

Of 5133 records identified, we reviewed 133 articles in full text, and 18 studies reported in 17 publications proved eligible (Figure 1, Appendix B); five RCTs in four publications<sup>43-46</sup> and 13 observational studies.<sup>47-59</sup> One study enrolled a mixed group of opioid and non-opioid users;<sup>50</sup> however, our attempts to contact the authors to acquire pain intensity data for the sub-group of patients prescribed opioids proved unsuccessful. All five RCTs<sup>43-46</sup> and three observational studies<sup>51, 54, 55</sup> enrolled patients with chronic cancer-related pain; the remaining 10 observational studies explored adding cannabis to opioids for patients with chronic non-cancer pain (e.g. chronic low back pain, fibromyalgia, painful chronic pancreatitis),<sup>47, 52, 53, 57-59</sup> or a mix of cancer and non-cancer pain (Table 1).<sup>48-50, 56</sup>

Among the 18 included studies, the percentage of female participants was 48% (median of individual trials 48%, interquartile range [IQR] 43% to 58%), and the median of the mean age was 56.3 (IQR 51.2 to 59.9). Follow-up ranged from 2 to 5 weeks among RCTs, and from 4 weeks to 6.4 years for observational studies. Only 1 RCT<sup>43</sup> used an enrichment design (following the open-label phase, patients with at least 15% improvement in pain were randomized to the intervention and control groups) and all RCTs advised patients to maintain stable doses of all other prescribed pain medications, including opioids, during the study period (Table 1). All included RCTs, and three of the observational studies<sup>48, 51, 52</sup> administered synthetic cannabis products (i.e. nabilone, dronabinol, and nabiximole), five observational studies<sup>49, 50, 56, 58, 59</sup> reported different combinations of THC: CBD products, and 6 other observational studies<sup>47, 53-55, 57</sup> did not provide details on the type of cannabis or cannabinoids provided (Table 1, Supplement Table 4). Ten studies reported receiving industry funding,<sup>43-46, 49, 51, 52, 57, 58</sup> five studies<sup>50, 53-56</sup>

1  
2  
3 reported no-industry funding, and three studies<sup>47, 48, 59</sup> did not report funding information (Table  
4  
5  
6  
7  
8  
9  
10  
11  
12  
13  
14  
15  
16  
17  
18  
19  
20  
21  
22  
23  
24  
25  
26  
27  
28  
29  
30  
31  
32  
33  
34  
35  
36  
37  
38  
39  
40  
41  
42  
43  
44  
45  
46  
47  
48  
49  
50  
51  
52  
53  
54  
55  
56  
57  
58  
59  
60  
1).  
  
**Risk of bias of included studies**  
  
All included RCTs reported adequate allocation concealment and blinding of patients and health-care providers; however, three trials<sup>43, 45, 46</sup> were at risk of bias due to high loss to follow up (Supplement Table 5). Each RCT specified that they employed an intention-to-treat analysis. All observational studies were at high risk of bias, typically due to lack of confidence in the assessment of exposure, non-representative samples, and insufficient control for confounding (Supplement Tables 6-7).  
  
**Outcomes for medical cannabis add-on therapy**  
  
**Opioid dose reduction**  
  
The primary limitation of RCTs was that all investigators instructed patients to not alter their dose of opioids. This represents a very serious indirectness of the findings regarding the research question, warranting rating down two levels, and was the primary reason for very low certainty evidence from the 1176 patients.<sup>43-45</sup> Their results raised the possibility that adding medical cannabis may not be associated with a reduction in opioid use among patients living with chronic cancer pain (WMD -3.4 MME; 95%CI -12.7 to 5.9; table 2; Supplement Figure 1). There were no differences in effect based on the loss to follow-up (Supplement Figure 2; test of interaction  $P=0.758$ ).  
  
Very-low certainty evidence from 8 observational studies (7 of which enrolled people with chronic non-cancer pain)<sup>47, 48, 50, 51, 53-55, 58</sup> raised the possibility that adding medical cannabis



1  
2  
3 may reduce the use of opioids among patients with predominantly chronic non-cancer pain  
4 (WMD -22.5 MME; 95%CI -43.06 to -1.97; Table 2; Supplement Figure 3). Three observational  
5  
6  
7 studies that could not be pooled, as they only reported opioid reduction as a percentage, also  
8  
9  
10 found that providing medical cannabis allowed patients to decrease their opioid dose. The first  
11  
12 study assessed the impact of providing medical cannabis to 61 patients with chronic low back  
13  
14 pain who were prescribed opioid therapy (median opioid dose was 21 mg MME/day) and  
15  
16 reported that 52% of patients (32 of 61) stopped all use of opioids at a median follow-up of 6.4  
17  
18 years.<sup>57</sup> The second study<sup>49</sup> reported that of 94 patients with chronic pain (both cancer and non-  
19  
20 cancer pain) who began using CBD hemp extract, 53% were able to decrease their use of  
21  
22 prescription opioids at 8 weeks. A third study<sup>56</sup> included 600 patients with chronic pain who  
23  
24 indicated willingness to taper their opioid dose and were administered 0.5g daily of medicinal  
25  
26 cannabis for each 10% reduction in opioid dose. After 6 months' follow-up, 55% of patients  
27  
28 reported a 30% reduction in opioid dose on average and 26% of them discontinued opioid use.  
29  
30  
31  
32  
33  
34

### 35 **Pain relief**

36  
37 High-certainty evidence from 5 RCTs<sup>43-46</sup> demonstrated that adding medical cannabis to opioid  
38  
39 therapy resulted in trivial or no difference in cancer related pain (WMD -0.18 cm; 95%CI -0.38  
40  
41 to 0.02 on the 10 cm VAS for pain; MID 1cm; Table 2; Supplement Figure 4). Results did not  
42  
43 differ depending on loss to follow-up (Supplement Figure 5, a test of interaction  $P=0.623$ ). Very  
44  
45 low certainty evidence from observational studies suggested a large decrease in pain when  
46  
47 medical cannabis was added to opioids (Supplement Figure 6).  
48  
49  
50  
51  
52  
53

### 54 **Sleep disturbance**

1  
2  
3 Five RCTs<sup>43-46</sup> provided high certainty evidence that adding medical cannabis to prescription  
4 opioids results in a trivial improvement in sleep disturbance in people living with cancer-related  
5 chronic pain (WMD -0.22 cm; 95%CI -0.4 to -0.06 on the 10 cm VAS for sleep disturbance;  
6 MID 1cm; Table 2; Supplement Figure 7). Results did not differ between trials reporting the low  
7 and high loss to follow-up (Supplement Figure 8, a test of interaction  $P=0.93$ ). Very low  
8 certainty evidence from observational studies suggested an improvement in sleep disturbance  
9 when medical cannabis was added to opioids (Supplement Table 8).

### 21 **Other reported outcomes**

22 A single RCT<sup>44</sup> reported moderate certainty evidence that adding cannabis likely has little or no  
23 effect on emotional and physical functioning (Supplement Tables 9-10).

### 31 **Adverse events**

#### 34 ***Nausea, vomiting, or constipation***

35  
36 4 RCTs<sup>43-46</sup> provided moderate certainty evidence that adding medical cannabis to opioid therapy  
37 likely increases the incidence of nausea (RR 1.43, 95%CI 1.04 to 1.96; RD 4%, 95%CI 0% to  
38 7%; Supplement Figure 9-10) and vomiting (RR 1.50; 95%CI 1.01 to 2.24; RD 3%; 95%CI 0%  
39 to 6%; Supplement Figure 11-12) in patients with cancer-related chronic pain prescribed opioid  
40 therapy. Three RCTs<sup>43, 45, 46</sup> provided low certainty evidence that adding medical cannabis to  
41 opioid therapy may not increase constipation (RR 0.85, 95%CI 0.54 to 1.35; RD -1%; 95%CI -  
42 4% to 2%; Supplement Figure 13-14). Supplement Table 11 summarizes adverse events reported  
43 in observational studies.

## DISCUSSION

Very-low certainty evidence from randomized trials and observational studies was conflicting and leaves uncertain whether the addition of medical cannabis affects the use of prescribed opioids among people living with chronic pain. Compared with long-term opioid therapy for chronic cancer pain without medical cannabis, high certainty evidence showed that adding medical cannabis had little to no effect on pain or sleep disturbance. Results provided moderate certainty evidence that adding cannabis therapy to opioids likely increases both nausea (RR 1.43, 95%CI 1.04 to 1.96) and vomiting (RR 1.50; 95%CI 1.01 to 2.24), and low certainty evidence suggested no effect on constipation (RR 0.85, 95%CI 0.54 to 1.35).

Strengths of our review include a comprehensive search for eligible randomized and observational studies, appraisal of the risk of bias among individual studies, and use of the GRADE approach to rate the certainty of evidence. Our review has limitations, primarily due to features of primary studies eligible for review, which failed to report all recommended outcomes that have been established as important for people living with chronic pain. Most observational studies incorporated inadequate adjustment for confounding. All randomized trials, despite reporting this outcome, were not designed to address the effect of medical cannabis on opioid use. All eligible RCTs enrolled patients with chronic cancer-related pain, and the generalizability to non-cancer chronic pain is uncertain. Specifically, substitution effects of medical cannabis for prescription opioids may also differ between chronic cancer and non-cancer pain; however, lack of variability among studies eligible for our review precluded exploration of this subgroup effect. Studies included in our review administered different formulations of cannabis and cannabinoid products; however, pooled effects of outcomes reported in RCTs showed no important heterogeneity.

1  
2  
3 A meta-analysis of pre-clinical studies,<sup>17</sup> a narrative systematic review,<sup>60</sup> and several  
4 cross-sectional and case studies have reported an apparent reduction in opioid use with addition  
5 of cannabis therapy.<sup>9, 10, 61-65</sup> In a national US population-based survey<sup>66</sup> of 2,774 cannabis users  
6 (both medical and non-medical use) 36% of respondents reported substituting cannabis for  
7 prescription opioids (discontinued opioid use). In this survey, the 60% of participants who  
8 identified as medical cannabis users were much more likely to substitute cannabis for  
9 prescription drugs than recreational users (OR 4.59; 95%CI 3.87 to 5.43). Another US survey<sup>67</sup>  
10 that included 841 patients prescribed long-term opioid therapy for chronic pain reported that  
11 61% used medical cannabis, and 97% of this subgroup reported coincident reduction of their  
12 opioid use. Consistent with these findings, very low certainty evidence from observational  
13 studies in our review also suggests that adding medical cannabis allows patients predominantly  
14 with chronic non-cancer pain to reduce their use of opioids. Although RCT results do not  
15 support reduction in opioid dose by adding medical cannabis for opioids, the evidence is also  
16 very low certainty, primarily because investigators instructed patients to maintain their current  
17 opioid dose. This is a critical limitation, despite the 2019 NICE guideline having concluded that  
18 providing medical cannabis for chronic pain does not reduce opioid use on the basis of these  
19 trials.<sup>68</sup> Future trials should randomize chronic pain patients who voluntarily agree to engage in a  
20 trial of opioid tapering to receive medical cannabis or placebo and report all patient-important  
21 outcomes.<sup>69</sup> Forced opioid tapering is ineffective<sup>70</sup> and may cause harm.<sup>71</sup>  
22  
23  
24  
25  
26  
27  
28  
29  
30  
31  
32  
33  
34  
35  
36  
37  
38  
39  
40  
41  
42  
43  
44  
45  
46  
47  
48  
49  
50  
51  
52  
53  
54  
55  
56  
57  
58  
59  
60

### ***Conclusion***

The opioid-sparing effects of medical cannabis for chronic pain remain uncertain. Based on moderate-to-high certainty evidence, adding medical cannabis to opioid therapy among chronic cancer pain patients had little or no effect on neither pain relief nor sleep disturbance and likely increases the risk of nausea and vomiting. The accompanying BMJ Rapid Recommendation<sup>18</sup> provides contextualized guidance based on this evidence, as well as three other systematic reviews on benefits,<sup>72</sup> harms<sup>73</sup> and patients' values and preferences<sup>74</sup>.

1  
2  
3 **Disclosures/Conflicts of Interest:** All authors have no financial relationships with any  
4 organizations that might have an interest in the submitted work.  
5  
6

7  
8 **Role of the Funding Source:** This review received no external funding or other support.  
9

10 **Ethical approval:** ethical approval was not required because this study retrieved and synthesized  
11 data from already published studies.  
12  
13

14 **Data:** Details of the characteristics of the included studies were shared in the supplementary  
15 materials. Data will be made available upon publication and can be obtained from the  
16 corresponding author at [bussejw@mcmaster.ca](mailto:bussejw@mcmaster.ca).  
17  
18  
19

20  
21 **Disclaimers:** None.  
22

23  
24 **Transparency:** All authors affirm that the manuscript is an honest, accurate, and transparent  
25 account of the study being reported; that no important aspects of the study have been omitted;  
26 and that any discrepancies from the study as planned (and, if relevant, registered) have been  
27 explained.  
28  
29  
30

31  
32 **Contribution:** JWB, AN and GHG conceived and designed the study. RC performed the  
33 literature search. AN, AM, YS, VA and YR selected the studies, extracted the relevant  
34 information, and assessed the risk of bias of selected studies. AN synthesised the data. AN wrote  
35 the first draft of the paper. AN, JWB, GHG and TA critically revised the manuscript for  
36 important intellectual content. AN, JWB, LT, GHG, MB and NB interpreted the findings. JWB,  
37 LT and GHG provided methodological support. All authors reviewed the paper and approved the  
38 final version. The corresponding author attests that all listed authors meet authorship criteria and  
39 that no others meeting the criteria have been omitted.  
40  
41  
42  
43  
44  
45  
46  
47  
48  
49  
50  
51  
52  
53  
54  
55  
56  
57  
58  
59  
60

1  
2  
3 Figure Legends  
4  
5  
6

7 **Figure 1:** Study selection process in review of opioid-sparing effects of cannabis in chronic pain  
8  
9  
10  
11  
12  
13  
14  
15  
16  
17  
18  
19  
20  
21  
22  
23  
24  
25  
26  
27  
28  
29  
30  
31  
32  
33  
34  
35  
36  
37  
38  
39  
40  
41  
42  
43  
44  
45  
46  
47  
48  
49  
50  
51  
52  
53  
54  
55  
56  
57

For peer review only

**Table 1: Characteristics of included studies (n=18)**

| Author-year (country)                                          | Study design     | No. of participants (% prescribed opioids)                                 | Type of chronic pain (specific condition) | Age mean (SD) | % Female | Baseline opioid dose                                                                                        | Follow-up duration | Medical cannabis dose                                                                     | Analgesic Co-intervention                                                                       | Funding source                  |
|----------------------------------------------------------------|------------------|----------------------------------------------------------------------------|-------------------------------------------|---------------|----------|-------------------------------------------------------------------------------------------------------------|--------------------|-------------------------------------------------------------------------------------------|-------------------------------------------------------------------------------------------------|---------------------------------|
| Fallon et al., 2017 study I (multicenter trial) <sup>43</sup>  | Parallel arm RCT | n=399; nabiximols [n=20], placebo [n=199] (100%)                           | 100% chronic cancer pain                  | 59.8 (10.9)   | 43%      | Receiving opioid therapy of <500 MME/day (Nabiximols group: 199MME/day±131; placebo group: 207MME/day±135)  | 5 weeks            | THC 27 mg/mL; CBD 25 mg/mL (maximum allowed daily dosage of 10 sprays)                    | Patients were excluded if they planned to undergo clinical interventions that would affect pain | Otsuka Pharmaceutical Co., Ltd. |
| Fallon et al., 2017 study II (multicenter trial) <sup>43</sup> | Parallel arm RCT | n=206; nabiximols [n=103], placebo=103 (100%)                              | 100% chronic cancer pain                  | 61.5 (11.3)   | 49%      | Receiving opioid therapy of <500 MME/day (Nabiximols: 212MME/day±136; placebo: 209MME/day±121)              | 5 weeks            | THC 27 mg/mL; CBD 25 mg/mL (maximum allowed daily dosage of 10 sprays)                    | Patients were excluded if they planned to undergo clinical interventions that would affect pain | Otsuka Pharmaceutical Co., Ltd. |
| Johnson et al., 2010 (multicenter trial) <sup>44</sup>         | Parallel arm RCT | n=177; THC: CBD extract [n= 60], THC extract [n=58], placebo [n=59] (100%) | 100% chronic cancer pain                  | 60.2 (12.3)   | 46%      | Receiving opioid therapy for at least one-week before enrollment (THC:CBD: 258MME/day±789; THC: 188MME±234; | 2 weeks            | One spray: 2.7mg THC/2.5mg CBD. The maximum permitted dose: 8 actuations over 3-hours and | Patients were excluded if they planned to undergo clinical interventions that would affect pain | GW Pharmaceuticals              |



|                                                                            |                                    |                                                                                                                                                                                                |                                                   |                |     |                                                                                                                          |                            |                                                                                                     |                                                                                                                      |                                                                         |
|----------------------------------------------------------------------------|------------------------------------|------------------------------------------------------------------------------------------------------------------------------------------------------------------------------------------------|---------------------------------------------------|----------------|-----|--------------------------------------------------------------------------------------------------------------------------|----------------------------|-----------------------------------------------------------------------------------------------------|----------------------------------------------------------------------------------------------------------------------|-------------------------------------------------------------------------|
|                                                                            |                                    |                                                                                                                                                                                                |                                                   |                |     | placebo:<br>367±886)                                                                                                     |                            | 48 actuations<br>over 24-hours                                                                      |                                                                                                                      |                                                                         |
| Lichtman<br>et al., 2018<br>(multicentre<br>r <sup>£</sup> ) <sup>45</sup> | Parallel arm<br>RCT                | n=398;<br>nabiximol<br>[n=199],<br>placebo<br>[n=198]<br>(100%)                                                                                                                                | 100%<br>chronic<br>cancer pain                    | 60<br>(11.5)   | 46% | Receiving<br>opioid therapy<br>of <500<br>MME/day<br>(nabiximols:<br>193MME/day±<br>130; placebo:<br>186MME/day±<br>131) | 5 weeks                    | THC 27<br>mg/mL; CBD<br>25 mg/mL<br>(maximum<br>allowed daily<br>dosage<br>of 10 sprays per<br>day) | Patients were<br>excluded if<br>they planned<br>to undergo<br>clinical<br>interventions<br>that would<br>affect pain | Otsuka<br>Pharmac<br>eutical<br>Co., Ltd.                               |
| Portenoy<br>et al., 2012<br>(multicentre<br>r <sup>£</sup> ) <sup>46</sup> | Parallel arm<br>RCT                | n=360;<br>nabiximols<br>low dose (1-4<br>sprays/day)<br>[n=91],<br>medium dose<br>(6-10<br>sprays/day)<br>[n=88], high<br>dose (11-16<br>sprays/day)<br>[n=90],<br>placebo<br>[n=91]<br>(100%) | 100%<br>chronic<br>cancer pain                    | 58<br>(12.2)   | 48% | Receiving<br>opioid therapy<br>of <500<br>MME/day<br>(median was<br>120MME/day;<br>range 3 to<br>16,660)                 | 5 weeks                    | THC 27<br>mg/mL; CBD<br>25 mg/mL<br>(maximum<br>allowed daily<br>dosage of 10<br>sprays per day)    | Patients were<br>allowed to use<br>breakthrough<br>opioid<br>analgesic as<br>required                                | GW<br>Pharmac<br>euticals;<br>Otsuka<br>Pharmac<br>eutical<br>Co., Ltd. |
| Barlow et<br>al., 2019<br>(US) <sup>47</sup>                               | Retrospectiv<br>e chart-<br>review | Enrolled in<br>MCP [n=34],<br>not enrolled in<br>MCP [n=19]<br>(100%)                                                                                                                          | 100% CNCP<br>(chronic<br>painful<br>pancreatitis) | 49.9<br>(10.5) | 45% | Not enrolled in<br>MCP<br>183MME/day±<br>284; enrolled in<br>MCP<br>190MME/day±<br>273                                   | Range 4<br>to 297<br>weeks | NR                                                                                                  | NR                                                                                                                   | NR                                                                      |
| Bellnier et<br>al., 2018<br>(US) <sup>48</sup>                             | One-arm<br>observational<br>study  | n= 29<br>(100%)                                                                                                                                                                                | 90% CNCP;<br>10% cancer<br>pain                   | 61<br>(10)     | 65% | Patients were<br>receiving a<br>median opioid<br>dose of<br>79.94MME/day                                                 | 13 weeks                   | 10mg capsules<br>of<br>THC/ CBD in a<br>1:1 ratio 3-times<br>daily                                  | NR                                                                                                                   | NR                                                                      |

|                                                  |                             |                                                                |                                           |                           |                  |                                                                  |          |                                                                                            |                                                                                                                     |                                    |    |    |    |    |    |    |    |    |    |    |    |    |    |    |    |    |    |    |    |    |    |    |    |    |    |    |    |    |    |    |    |    |    |    |    |    |
|--------------------------------------------------|-----------------------------|----------------------------------------------------------------|-------------------------------------------|---------------------------|------------------|------------------------------------------------------------------|----------|--------------------------------------------------------------------------------------------|---------------------------------------------------------------------------------------------------------------------|------------------------------------|----|----|----|----|----|----|----|----|----|----|----|----|----|----|----|----|----|----|----|----|----|----|----|----|----|----|----|----|----|----|----|----|----|----|----|----|
| 1                                                | 2                           | 3                                                              | 4                                         | 5                         | 6                | 7                                                                | 8        | 9                                                                                          | 10                                                                                                                  | 11                                 | 12 | 13 | 14 | 15 | 16 | 17 | 18 | 19 | 20 | 21 | 22 | 23 | 24 | 25 | 26 | 27 | 28 | 29 | 30 | 31 | 32 | 33 | 34 | 35 | 36 | 37 | 38 | 39 | 40 | 41 | 42 | 43 | 44 | 45 | 46 | 47 |
| Capano et al., 2020 (US) <sup>49</sup>           | One-arm observational study | n= 131 (100%)                                                  | 100% chronic pain (cancer and non-cancer) | 56.1 (range: 39 to 70)    | 68%              | Receiving at least 50MME/day                                     | 8 weeks  | 30mg CBD/1mg THC                                                                           | NR                                                                                                                  | Ananda Professional.               |    |    |    |    |    |    |    |    |    |    |    |    |    |    |    |    |    |    |    |    |    |    |    |    |    |    |    |    |    |    |    |    |    |    |    |    |
| Haroutounian et al., 2016 (Israel) <sup>50</sup> | One-arm observational study | n=73 (35%)                                                     | 93.2% CNCP; 6.8% chronic cancer pain      | 51.2 (15.4) <sup>¥</sup>  | 38% <sup>¥</sup> | Receiving a median opioid dose of 60MME/day (range 45 - 90)      | 26 weeks | Cigarettes: 6% to 14% THC, 0.2% to 3.8% CBD;<br><br>Oral: 11% to 19% THC, 0.5% to 5.5% CBD | All participants were encouraged to attempt gradual dose reduction and possible discontinuation of other analgesics | No-external funding                |    |    |    |    |    |    |    |    |    |    |    |    |    |    |    |    |    |    |    |    |    |    |    |    |    |    |    |    |    |    |    |    |    |    |    |    |
| Maida et al., 2008 (Canada) <sup>51</sup>        | Prospective cohort          | Enrolled in MCP [n=47], not enrolled in MCP [n=65] (100%)      | 100% chronic cancer pain                  | 69.7 (10.1)               | 42%              | nabilone treated:60MME/day±64; nabilone untreated: 67MME/day±101 | 4 weeks  | On average 1.79 mg twice daily nabilone                                                    | Patients were permitted to use concomitant analgesics                                                               | Valeant Pharmaceuticals Canada Ltd |    |    |    |    |    |    |    |    |    |    |    |    |    |    |    |    |    |    |    |    |    |    |    |    |    |    |    |    |    |    |    |    |    |    |    |    |
| Narang et al., 2008 (US) <sup>52</sup>           | One-arm observational study | n=30 (100%)                                                    | 100% CNCP                                 | Median=43.5 (range=21-67) | 53%              | Receiving an average opioid dose of 68MME/day±57                 | 4 weeks  | Flexible dose schedule, dronabinol 5mg to 20mg 3 times daily                               | NR                                                                                                                  | Solvay Pharmaceuticals, Inc.       |    |    |    |    |    |    |    |    |    |    |    |    |    |    |    |    |    |    |    |    |    |    |    |    |    |    |    |    |    |    |    |    |    |    |    |    |
| O'Connell et al., 2019 (US) <sup>53</sup>        | One-arm observational study | n=77 (100%)                                                    | 100% CNCP                                 | 54.1 (range=26-76)        | 58%              | Receiving a mean opioid dose of 140MME/day±184                   | 26 weeks | NR                                                                                         | NR                                                                                                                  | No industry funding                |    |    |    |    |    |    |    |    |    |    |    |    |    |    |    |    |    |    |    |    |    |    |    |    |    |    |    |    |    |    |    |    |    |    |    |    |
| Pritchard et al., 2020 (US) <sup>54</sup>        | Retrospective cohort        | cannabis and opioids co-use [n=22], opioids only [n=61] (100%) | 100% chronic cancer pain                  | 53.1 (11.7)               | 23%              | MCP enrolled: 144MME/day±129; MCP not enrolled: 119MME/day ±100  | 26 weeks | NR                                                                                         | NR                                                                                                                  | No industry funding                |    |    |    |    |    |    |    |    |    |    |    |    |    |    |    |    |    |    |    |    |    |    |    |    |    |    |    |    |    |    |    |    |    |    |    |    |

|                                           |                             |                                                            |                                           |                |     |                                                                                        |                                                                      |                                                                                  |                                                                                                                                     |                                                         |
|-------------------------------------------|-----------------------------|------------------------------------------------------------|-------------------------------------------|----------------|-----|----------------------------------------------------------------------------------------|----------------------------------------------------------------------|----------------------------------------------------------------------------------|-------------------------------------------------------------------------------------------------------------------------------------|---------------------------------------------------------|
| Pawasarat et al., 2020 (US) <sup>55</sup> | Retrospective chart review  | Enrolled in MCP [n=137], not enrolled in MCP [n=95] (100%) | 100% chronic cancer pain                  | 58 (IQR: 14.7) | 56% | MCP enrolled: median 45MME/day, IQR=135; MCP not enrolled: median 97.5MME/day, IQR=150 | Between 39 and 52 weeks for MCP enrolled; <26 weeks for not enrolled | NR                                                                               | NR                                                                                                                                  | No industry funding                                     |
| Rod et al., 2019 (Canada) <sup>56</sup>   | One-arm observational study | n=600                                                      | 100% chronic pain (cancer and non-cancer) | NR             | NR  | Receiving a mean opioid dose of 120 MME/day (range 90 to 240MME/day)                   | 26 weeks                                                             | CBD and THC ranged between 4% to 6%. Doses related directly to the opioid taper. | All participants indicated ready to reduce opioid dose and also received psychological supports (e.g. CBT, mindfulness, relaxation) | No external funding                                     |
| Takakuwa et al., 2020 (US) <sup>57</sup>  | One-arm observational study | n=61 (100%)                                                | 100% CNCP (back pain)                     | 50 (11.4)      | 38% | Receiving a median opioid dose of 21MME/day                                            | Median of 6.4 years among patients who ceased opioids completely     | NR                                                                               | NR                                                                                                                                  | The Society of Cannabis Clinicians                      |
| Vigil et al., 2017 (US) <sup>58</sup>     | Retrospective chart review  | Enrolled in MCP [n=37], not enrolled [n=29] (100%)         | 100% CNCP (90% back pain)                 | 56.3 (11.8)    | 36% | Maximum daily dosage of < 200MME/day (enrolled in MCP: mean 24MME/day±23; not enrolled | 52 weeks                                                             | NR                                                                               | NR                                                                                                                                  | University of New Mexico Medical Cannabis Research Fund |

1  
2  
3  
4  
5  
6  
7  
8  
9  
10  
11  
12  
13  
14  
15  
16  
17  
18  
19  
20  
21  
22  
23  
24  
25  
26  
27  
28  
29  
30  
31  
32  
33  
34  
35  
36  
37  
38  
39  
40  
41  
42  
43  
44  
45  
46  
47

|                                            |                             |             |                          |             |     |                                          |          |                                                                                                      |                                                                                                                             |    |
|--------------------------------------------|-----------------------------|-------------|--------------------------|-------------|-----|------------------------------------------|----------|------------------------------------------------------------------------------------------------------|-----------------------------------------------------------------------------------------------------------------------------|----|
|                                            |                             |             |                          |             |     | in MCP: mean<br>16MME/day±1<br>4)        |          |                                                                                                      |                                                                                                                             |    |
| Yassin et al., 2019 (Israel) <sup>59</sup> | One-arm observational study | n=31 (100%) | 100% CNCP (fibromyalgia) | 33.4 (12.3) | 90% | Receiving Oxycodone 5 mg three times/day | 26 weeks | THC to CBD ratio was 1:4; 20 g/month for 3 months, increased up to 30 g/month at the end of 6 months | Patients were permitted to use standardized analgesic therapy (duloxetine 30 mg once daily and Targin 5/2.5 mg twice a day) | NR |

\*CNCP: Chronic non-cancer pain; MCP: Medical Cannabis Program; MME: milligram morphine equivalent; FU: follow-up; NR: not reported

‡ Based on the whole population including opioid users and non-users

£In Belgium, Bulgaria, Czech Republic, Estonia, Germany, Hungary, Latvia, Lithuania, Poland, Romania, the United Kingdom and the United States

For peer review only

**Table 2: GRADE Evidence Profile of medical cannabis or cannabinoids for patients with chronic pain prescribed long-term opioid therapy**

| # of studies                                                                              | # of Patients | FU Duration (Weeks) | Risk of bias <sup>a</sup>            | Inconsistency (I <sup>2</sup> , P-value) <sup>b</sup> | Indirectness <sup>c</sup>              | Imprecision <sup>d</sup>         | Publication bias | Treatment association (95% CI) | Overall certainty of evidence |
|-------------------------------------------------------------------------------------------|---------------|---------------------|--------------------------------------|-------------------------------------------------------|----------------------------------------|----------------------------------|------------------|--------------------------------|-------------------------------|
| <b>Opioid dose: morphine milligram equivalents (MME) per day</b>                          |               |                     |                                      |                                                       |                                        |                                  |                  |                                |                               |
| 4 RCTs <sup>43-45</sup>                                                                   | 1,176         | 2 to 5              | No serious risk of bias <sup>e</sup> | No serious inconsistency [40%, P=0.15]                | Very serious indirectness <sup>f</sup> | Serious imprecision <sup>g</sup> | Not detected     | WMD -3.4MME (-12.7 to 5.8)     | Very Low                      |
| 8 Observational studies <sup>47, 48, 50, 51, 53-55, 58</sup>                              | 453           | 4 to 297            | Serious risk of bias <sup>h</sup>    | Serious inconsistency [visual inspection]             | No serious indirectness                | No serious imprecision           | Not detected     | WMD -22.5MME (-43.06 to -1.97) | Very low                      |
| <b>Pain: 10 cm VAS for pain; lower is better; the MID = 1 cm</b>                          |               |                     |                                      |                                                       |                                        |                                  |                  |                                |                               |
| 5 RCTs <sup>43-46</sup>                                                                   | 1,536         | 2 to 5              | No serious risk of bias              | No serious inconsistency [28%, P=0.20]                | No serious indirectness                | No serious imprecision           | Not detected     | WMD -0.18 (-0.38 to 0.02)      | High                          |
| <b>Sleep disturbance: 10 cm VAS for sleep disturbance; lower is better; the MID= 1 cm</b> |               |                     |                                      |                                                       |                                        |                                  |                  |                                |                               |
| 5 RCTs <sup>43-46</sup>                                                                   | 1,536         | 2 to 5              | No serious risk of bias              | No serious inconsistency [0%, P=0.45]                 | No serious indirectness                | No serious imprecision           | Not detected     | WMD -0.22 (-0.39 to -0.06)     | High                          |
| <b>Nausea</b>                                                                             |               |                     |                                      |                                                       |                                        |                                  |                  |                                |                               |
| 4 RCTs <sup>43-46</sup>                                                                   | 1330          | 2 to 5              | Serious risk of bias                 | No serious inconsistency [0%, P=0.88]                 | No serious indirectness                | No serious imprecision           | Not detected     | RR 1.43 (1.04 to 1.96)         | Moderate                      |
| <b>Vomiting</b>                                                                           |               |                     |                                      |                                                       |                                        |                                  |                  |                                |                               |

1  
2  
3  
4  
5  
6  
7  
8  
9  
10  
11  
12  
13  
14  
15  
16  
17  
18  
19  
20  
21  
22  
23  
24  
25  
26  
27  
28  
29  
30  
31  
32  
33  
34  
35  
36  
37  
38  
39  
40  
41  
42  
43  
44  
45  
46  
47

|                              |      |        |                                   |                                               |                         |                                  |              |                        |          |
|------------------------------|------|--------|-----------------------------------|-----------------------------------------------|-------------------------|----------------------------------|--------------|------------------------|----------|
| 4 RCTs <sup>43-46</sup>      | 1330 | 2 to 5 | Serious risk of bias              | No serious inconsistency [0%, <i>P</i> =0.50] | No serious indirectness | No serious imprecision           | Not detected | RR 1.5 (1.01 to 2.24)  | Moderate |
| <b>Constipation</b>          |      |        |                                   |                                               |                         |                                  |              |                        |          |
| 3 RCTs <sup>43, 45, 46</sup> | 1153 | 5      | Serious risk of bias <sup>i</sup> | No serious inconsistency [0%, <i>P</i> =0.92] | No serious indirectness | Serious imprecision <sup>g</sup> | Not detected | RR 0.85 (0.54 to 1.35) | Low      |

WMD: weighted mean difference; RR: relative risk; 95% CI: 95% confidence interval; VAS: visual analogue scale; MID: minimally important difference; FU: follow-up.

- <sup>a</sup> We assessed risk of bias using a modified Cochrane risk of bias instrument.
- <sup>b</sup> Inconsistency refers to unexplained heterogeneity of results. For RCTs an *I*<sup>2</sup> of 75-100% indicates that heterogeneity may be considerable. We assessed heterogeneity of pooled observational studies through visual inspection of forest plots.
- <sup>c</sup> Indirectness results if the intervention, control, patients or outcomes are different from the research question under investigation.
- <sup>d</sup> Serious imprecision refers to situations in which the confidence interval includes both benefit and harm (the 95%CI includes 1 MID).
- <sup>e</sup> Some of the included RCTs were at high risk of bias, due to loss to follow-up (>20%); however, we did not rate down for risk of bias as subgroup analysis showed no difference in treatment effect between trials at high and low risk of bias for missing outcome data (test of interaction *p*= 0.758 and *p*=0.623 for opioid dose reduction and pain respectively).
- <sup>f</sup> Downgraded twice due to indirectness since all trials instructed participants to maintain their opioid dose during the study period.
- <sup>g</sup> The 95%CI around the WMD includes no effect.
- <sup>h</sup> Studies are based on non-representative samples.
- <sup>i</sup> Most RCTs were at high risk of bias due to loss to follow-up (>20%).

**References:**

1. Schopflocher D, Taenzer P, Jovey R. The prevalence of chronic pain in Canada. *Pain Res Manag* 2011;16(6):445-50. doi: 10.1155/2011/876306.
2. Schappert SM, Burt CW. Ambulatory care visits to physician offices, hospital outpatient departments, and emergency departments: United States, 2001-02. *Vital and Health Statistics Series 13, Data from the National Health Survey* 2006(159):1-66.
3. International Narcotics Control Board. Narcotic drugs: estimated world requirements for 2019: [https://www.incb.org/documents/Narcotic-Drugs/Technical-Publications/2018/INCB-Narcotics\\_Drugs\\_Technical\\_Publication\\_2018.pdf](https://www.incb.org/documents/Narcotic-Drugs/Technical-Publications/2018/INCB-Narcotics_Drugs_Technical_Publication_2018.pdf) (Accessed: 02 Nov 2020). Vienna: United Nations.
4. Busse JW, Wang L, Kamaleldin M, et al. Opioids for Chronic Noncancer Pain: A Systematic Review and Meta-analysis. *JAMA* 2018;320(23):2448-60. doi: 10.1001/jama.2018.18472.
5. Gomes T, Greaves S, Martins D, et al. Latest Trends in Opioid-Related Deaths in Ontario: 1991 to 2015. Toronto: Ontario Drug Policy Research Network, 2017.
6. Busse JW, Craigie S, Juurlink DN, et al. Guideline for opioid therapy and chronic noncancer pain. *CMAJ* 2017;189(18):E659-e66. doi: 10.1503/cmaj.170363.
7. Gomes T, Mamdani MM, Paterson JM, Dhalla IA, Juurlink DN. Trends in high-dose opioid prescribing in Canada. *Can Fam Physician* 2014;60(9):826-32.
8. Bedson J, Chen Y, Ashworth J, et al. Risk of adverse events in patients prescribed long-term opioids: A cohort study in the UK Clinical Practice Research Datalink. *Eur J Pain* 2019;23(5):908-22. doi: 10.1002/ejp.1357.

- 1  
2  
3 9. Gwira Baumblatt JA, Wiedeman C, Dunn JR, et al. High-risk use by patients prescribed  
4 opioids for pain and its role in overdose deaths. *JAMA Intern Med* 2014;174(5):796-801.  
5  
6 doi: 10.1001/jamainternmed.2013.12711.  
7  
8
- 9  
10 10. Bohnert AS, Logan JE, Ganoczy D, Dowell D. A Detailed Exploration Into the Association  
11 of Prescribed Opioid Dosage and Overdose Deaths Among Patients With Chronic Pain. *Med*  
12  
13 *Care* 2016;54(5):435-41. doi: 10.1097/mlr.0000000000000505.  
14  
15
- 16  
17 11. Attal N, Mazaltarine G, Perrouin-Verbe B, Albert T. Chronic neuropathic pain management  
18 in spinal cord injury patients. What is the efficacy of pharmacological treatments with a  
19  
20 general mode of administration? (oral, transdermal, intravenous). *Ann Phys Rehabil Med*  
21  
22 2009;52(2):124-41. doi: 10.1016/j.rehab.2008.12.011.  
23  
24
- 25  
26 12. Livingston MD, Barnett TE, Delcher C, Wagenaar AC. Recreational Cannabis Legalization  
27 and Opioid-Related Deaths in Colorado, 2000-2015. *Am J Public Health*  
28  
29 2017;107(11):1827-9. doi: 10.2105/ajph.2017.304059.  
30  
31
- 32  
33 13. Bradford AC, Bradford WD. Medical Marijuana Laws Reduce Prescription Medication Use  
34 In Medicare Part D. *Health Aff (Millwood)* 2016;35(7):1230-6. doi:  
35  
36 10.1377/hlthaff.2015.1661.  
37  
38
- 39  
40 14. Bachhuber MA, Saloner B, Cunningham CO, Barry CL. Medical cannabis laws and opioid  
41 analgesic overdose mortality in the United States, 1999-2010. *JAMA Intern Med*  
42  
43 2014;174(10):1668-73. doi: 10.1001/jamainternmed.2014.4005.  
44  
45
- 46  
47 15. Boehnke KF, Litinas E, Clauw DJ. Medical Cannabis Use Is Associated With Decreased  
48  
49 Opiate Medication Use in a Retrospective Cross-Sectional Survey of Patients With Chronic  
50  
51 Pain. *J Pain* 2016;17(6):739-44. doi: 10.1016/j.jpain.2016.03.002.  
52  
53  
54  
55  
56  
57  
58  
59  
60



- 1  
2  
3 16. Piper BJ, DeKeuster RM, Beals ML, et al. Substitution of medical cannabis for  
4  
5 pharmaceutical agents for pain, anxiety, and sleep. *J Psychopharmacol* 2017;31(5):569-75.  
6  
7 doi: 10.1177/0269881117699616.  
8  
9
- 10 17. Nielsen S, Sabioni P, Trigo JM, et al. Opioid-Sparing Effect of Cannabinoids: A Systematic  
11  
12 Review and Meta-Analysis. *Neuropsychopharmacology* 2017;42(9):1752-65. doi:  
13  
14 10.1038/npp.2017.51.  
15  
16
- 17 18. Busse JW, Vankrunkelsven P, Zeng L, et al. Medical cannabis for chronic pain: a clinical  
18  
19 practice guideline. *BMJ* 2020(submitted).  
20  
21
- 22 19. Stroup DF, Berlin JA, Morton SC, et al. Meta-analysis of observational studies in  
23  
24 epidemiology: a proposal for reporting. Meta-analysis Of Observational Studies in  
25  
26 Epidemiology (MOOSE) group. *JAMA* 2000;283(15):2008-12. doi:  
27  
28 10.1001/jama.283.15.2008.  
29  
30
- 31 20. Liberati A, Altman DG, Tetzlaff J, et al. The PRISMA statement for reporting systematic  
32  
33 reviews and meta-analyses of studies that evaluate healthcare interventions: explanation and  
34  
35 elaboration. *BMJ* 2009;339:b2700. doi: 10.1136/bmj.b2700.  
36  
37
- 38 21. Classification of chronic pain. Descriptions of chronic pain syndromes and definitions of  
39  
40 pain terms. Prepared by the International Association for the Study of Pain, Subcommittee  
41  
42 on Taxonomy. *Pain Suppl* 1986;3:S1-226.  
43  
44
- 45 22. Lintzeris N, Driels J, Elias N, et al. Medicinal cannabis in Australia, 2016: the Cannabis as  
46  
47 Medicine Survey (CAMS-16). *Med J Aust* 2018;209(5):211-6.  
48  
49
- 50 23. ElSohly MA, Ross SA, Mehmedic Z, et al. Potency trends of delta9-THC and other  
51  
52 cannabinoids in confiscated marijuana from 1980-1997. *J Forensic Sci* 2000;45(1):24-30.  
53  
54  
55  
56  
57  
58  
59  
60

- 1  
2  
3 24. Reeves BC, Deeks JJ, Higgins JPT, et al. Chapter 24: Including non-randomized studies on  
4 intervention effects. In: Higgins JPT TJ, Chandler J, Cumpston M, Li T, Page MJ, Welch  
5 VA (editors). editor: *Cochrane Handbook for Systematic Reviews of Interventions* version  
6 6.1. Available from [www.training.cochrane.org/handbook](http://www.training.cochrane.org/handbook); 2020.  
7  
8  
9
- 10  
11  
12 25. Dworkin RH, Turk DC, Farrar JT, et al. Core outcome measures for chronic pain clinical  
13 trials: IMMPACT recommendations. *Pain* 2005;113(1-2):9-19. doi:  
14 10.1016/j.pain.2004.09.012.  
15  
16
- 17  
18 26. Goshua A, Craigie S, Guyatt GH, et al. Patient Values and Preferences Regarding Opioids  
19 for Chronic Noncancer Pain: A Systematic Review. *Pain Med* 2018;19(12):2469-80. doi:  
20 10.1093/pm/pnx274.  
21  
22
- 23  
24 27. Akl EA, Sun X, Busse JW, et al. Specific instructions for estimating unclearly reported  
25 blinding status in randomized trials were reliable and valid. *J Clin Epidemiol*  
26 2012;65(3):262-7. doi: 10.1016/j.jclinepi.2011.04.015.  
27  
28
- 29  
30 28. Higgins JP, Altman DG, Gøtzsche PC, et al. The Cochrane Collaboration's tool for assessing  
31 risk of bias in randomised trials. *BMJ* 2011;343:d5928. doi: 10.1136/bmj.d5928.  
32  
33
- 34  
35 29. Tool to Assess Risk of Bias. CLARITY Group at McMaster University. Access  
36 [www.evidencepartners.com/resources/methodological-resources/](http://www.evidencepartners.com/resources/methodological-resources/); Evidence partner; 2020  
37 [cited 2020 04 November, 2020].  
38  
39
- 40  
41 30. Landis JR, Koch GG. The measurement of observer agreement for categorical data.  
42 *Biometrics* 1977;33(1):159-74.  
43  
44
- 45  
46 31. Farrar JT, Young JP, Jr., LaMoreaux L, Werth JL, Poole RM. Clinical importance of  
47 changes in chronic pain intensity measured on an 11-point numerical pain rating scale. *Pain*  
48 2001;94(2):149-58. doi: 10.1016/s0304-3959(01)00349-9.  
49  
50  
51  
52  
53  
54  
55  
56  
57

- 1  
2  
3 32. Zisapel N, Nir T. Determination of the minimal clinically significant difference on a patient  
4 visual analog sleep quality scale. *J Sleep Res* 2003;12(4):291-8. doi: 10.1046/j.0962-  
5 1105.2003.00365.x.  
6  
7  
8  
9  
10 33. DerSimonian R, Laird N. Meta-analysis in clinical trials. *Control Clin Trials* 1986;7(3):177-  
11 88. doi: 10.1016/0197-2456(86)90046-2.  
12  
13  
14 34. Wan X, Wang W, Liu J, Tong T. Estimating the sample mean and standard deviation from  
15 the sample size, median, range and/or interquartile range. *BMC Med Res Methodol*  
16 2014;14:135. doi: 10.1186/1471-2288-14-135.  
17  
18  
19 35. Ma J, Liu W, Hunter A, Zhang W. Performing meta-analysis with incomplete statistical  
20 information in clinical trials. *BMC Med Res Methodol* 2008;8:56. doi: 10.1186/1471-2288-  
21 8-56.  
22  
23  
24 36. Rücker G, Cates CJ, Schwarzer G. Methods for including information from multi-arm trials  
25 in pairwise meta-analysis. *Res Synth Methods* 2017;8(4):392-403. doi: 10.1002/jrsm.1259.  
26  
27  
28 37. Rücker G, Schwarzer G, Carpenter JR, Schumacher M. Undue reliance on I(2) in assessing  
29 heterogeneity may mislead. *BMC Med Res Methodol* 2008;8:79. doi: 10.1186/1471-2288-8-  
30 79.  
31  
32  
33 38. Guyatt GH, Oxman AD, Vist GE, et al. GRADE: an emerging consensus on rating quality of  
34 evidence and strength of recommendations. *BMJ* 2008;336(7650):924-6. doi:  
35 10.1136/bmj.39489.470347.AD.  
36  
37  
38 39. Higgins JPT, Thomas J, Chandler J, Cumpston M, Li T, Page MJ, Welch VA (editors).  
39 Cochrane Handbook for Systematic Reviews of Interventions version 6.0 (updated July  
40 2019). Cochrane, 2019. Available from [www.training.cochrane.org/handbook](http://www.training.cochrane.org/handbook).  
41  
42  
43  
44  
45  
46  
47  
48  
49  
50  
51  
52  
53  
54  
55  
56  
57  
58  
59  
60

- 1  
2  
3 40. Guyatt GH, Oxman AD, Kunz R, et al. GRADE guidelines: 8. Rating the quality of  
4 evidence--indirectness. *J Clin Epidemiol* 2011;64(12):1303-10. doi:  
5  
6 10.1016/j.jclinepi.2011.04.014.  
7  
8  
9  
10 41. Guyatt GH, Oxman AD, Sultan S, et al. GRADE guidelines: 9. Rating up the quality of  
11 evidence. *J Clin Epidemiol* 2011;64(12):1311-6. doi: 10.1016/j.jclinepi.2011.06.004.  
12  
13  
14 42. Egger M, Davey Smith G, Schneider M, Minder C. Bias in meta-analysis detected by a  
15 simple, graphical test. *BMJ* 1997;315(7109):629-34. doi: 10.1136/bmj.315.7109.629.  
16  
17  
18 43. Fallon MT, Albert Lux E, McQuade R, et al. Sativex oromucosal spray as adjunctive therapy  
19 in advanced cancer patients with chronic pain unalleviated by optimized opioid therapy: two  
20 double-blind, randomized, placebo-controlled phase 3 studies. *Br J Pain* 2017;11(3):119-33.  
21 doi: 10.1177/2049463717710042.  
22  
23  
24 44. Johnson JR, Burnell-Nugent M, Lossignol D, et al. Multicenter, double-blind, randomized,  
25 placebo-controlled, parallel-group study of the efficacy, safety, and tolerability of  
26 THC:CBD extract and THC extract in patients with intractable cancer-related pain. *J Pain*  
27 *Symptom Manage* 2010;39(2):167-79. doi: 10.1016/j.jpainsymman.2009.06.008.  
28  
29  
30 45. Lichtman AH, Lux EA, McQuade R, et al. Results of a Double-Blind, Randomized,  
31 Placebo-Controlled Study of Nabiximols Oromucosal Spray as an Adjunctive Therapy in  
32 Advanced Cancer Patients with Chronic Uncontrolled Pain. *J Pain Symptom Manage*  
33 2018;55(2):179-88.e1. doi: 10.1016/j.jpainsymman.2017.09.001.  
34  
35  
36 46. Portenoy RK, Ganae-Motan ED, Allende S, et al. Nabiximols for opioid-treated cancer  
37 patients with poorly-controlled chronic pain: a randomized, placebo-controlled, graded-dose  
38 trial. *J Pain* 2012;13(5):438-49. doi: 10.1016/j.jpain.2012.01.003.  
39  
40  
41  
42  
43  
44  
45  
46  
47  
48  
49  
50  
51  
52  
53  
54  
55  
56  
57  
58  
59  
60

- 1  
2  
3 47. Barlowe TS, Koliiani-Pace JL, Smith KD, Gordon SR, Gardner TB. Effects of Medical  
4  
5 Cannabis on Use of Opioids and Hospital Visits by Patients With Painful Chronic  
6  
7 Pancreatitis. *Clin Gastroenterol Hepatol* 2019;17(12):2608-9.e1. doi:  
8  
9 10.1016/j.cgh.2019.01.018.  
10  
11  
12 48. Bellnier T, Brown GW. Preliminary evaluation of the efficacy, safety, and costs associated  
13  
14 with the treatment of chronic pain with medical cannabis. *Ment Health Clin* 2018;8(3):110-  
15  
16 5. doi: 10.9740/mhc.2018.05.110.  
17  
18  
19 49. Capano A, Weaver R, Burkman E. Evaluation of the effects of CBD hemp extract on opioid  
20  
21 use and quality of life indicators in chronic pain patients: a prospective cohort study.  
22  
23 *Postgrad Med* 2020;132(1):56-61. doi: 10.1080/00325481.2019.1685298.  
24  
25  
26 50. Haroutounian S, Ratz Y, Ginosar Y, et al. The Effect of Medicinal Cannabis on Pain and  
27  
28 Quality-of-Life Outcomes in Chronic Pain: A Prospective Open-label Study. *Clin J Pain*  
29  
30 2016;32(12):1036-43. doi: 10.1097/ajp.0000000000000364.  
31  
32  
33 51. Maida V, Ennis M, Irani S, Corbo M, Dolzhykov M. Adjunctive nabilone in cancer pain and  
34  
35 symptom management: a prospective observational study using propensity scoring. *J*  
36  
37 *Support Oncol* 2008;6(3):119-24.  
38  
39  
40 52. Narang S, Gibson D, Wasan AD, et al. Efficacy of dronabinol as an adjuvant treatment for  
41  
42 chronic pain patients on opioid therapy. *J Pain* 2008;9(3):254-64. doi:  
43  
44 10.1016/j.jpain.2007.10.018.  
45  
46  
47 53. O'Connell M, Sandgren M, Frantzen L, Bower E, Erickson B. Medical Cannabis: Effects on  
48  
49 Opioid and Benzodiazepine Requirements for Pain Control. *Ann Pharmacother*  
50  
51 2019;53(11):1081-6. doi: 10.1177/1060028019854221.  
52  
53  
54  
55  
56  
57  
58  
59  
60

- 1  
2  
3 54. Pritchard ER, Dayer L, Belz J, et al. Effect of cannabis on opioid use in patients with cancer  
4 receiving palliative care. *J Am Pharm Assoc (2003)* 2020;60(1):244-7. doi:  
5  
6 10.1016/j.japh.2019.10.013.  
7  
8  
9  
10 55. Pawasarat IM, Schultz EM, Frisby JC, et al. The Efficacy of Medical Marijuana in the  
11 Treatment of Cancer-Related Pain. *J Palliat Med* 2020;23(6):809-16. doi:  
12  
13 10.1089/jpm.2019.0374.  
14  
15  
16 56. Rod K. A pilot study of a medical cannabis-opioid reduction program. *Am J Psychiatry*  
17  
18 *Neurosci* 2019;7(3):74. doi: 10.11648/j.ajpn.20190703.14.  
19  
20  
21 57. Takakuwa KM, Hergenrather JY, Shofer FS, Schears RM. The Impact of Medical Cannabis  
22 on Intermittent and Chronic Opioid Users with Back Pain: How Cannabis Diminished  
23 Prescription Opioid Usage. *Cannabis Cannabinoid Res* 2020;5(3):263-70. doi:  
24  
25 10.1089/can.2019.0039.  
26  
27  
28  
29  
30 58. Vigil JM, Stith SS, Adams IM, Reeve AP. Associations between medical cannabis and  
31 prescription opioid use in chronic pain patients: A preliminary cohort study. *PLoS One*  
32  
33 2017;12(11):e0187795. doi: 10.1371/journal.pone.0187795.  
34  
35  
36  
37 59. Yassin M, Oron A, Robinson D. Effect of adding medical cannabis to analgesic treatment in  
38 patients with low back pain related to fibromyalgia: an observational cross-over single  
39 centre study. *Clin Exp Rheumatol* 2019;37 Suppl 116(1):13-20.  
40  
41  
42  
43  
44 60. Okusanya BO, Asaolu IO, Ehiri JE, et al. Medical cannabis for the reduction of opioid  
45 dosage in the treatment of non-cancer chronic pain: a systematic review. *Syst Rev*  
46  
47 2020;9(1):167. doi: 10.1186/s13643-020-01425-3.  
48  
49  
50  
51  
52  
53  
54  
55  
56  
57  
58  
59  
60

- 1  
2  
3 61. Zaller N, Topletz A, Frater S, Yates G, Lally M. Profiles of medicinal cannabis patients  
4 attending compassion centers in rhode island. *J Psychoactive Drugs* 2015;47(1):18-23. doi:  
5 10.1080/02791072.2014.999901.  
6  
7  
8  
9  
10 62. Hazekamp A, Ware MA, Muller-Vahl KR, Abrams D, Grotenhermen F. The medicinal use  
11 of cannabis and cannabinoids--an international cross-sectional survey on administration  
12 forms. *J Psychoactive Drugs* 2013;45(3):199-210. doi: 10.1080/02791072.2013.805976.  
13  
14  
15  
16  
17 63. Lucas P, Walsh Z, Crosby K, et al. Substituting cannabis for prescription drugs, alcohol and  
18 other substances among medical cannabis patients: The impact of contextual factors. *Drug*  
19  
20  
21  
22  
23  
24 64. Cooper ZD, Bedi G, Ramesh D, et al. Impact of co-administration of oxycodone and smoked  
25 cannabis on analgesia and abuse liability. *Neuropsychopharmacology* 2018;43(10):2046-55.  
26  
27  
28  
29  
30  
31 65. Ishida JH, Wong PO, Cohen BE, et al. Substitution of marijuana for opioids in a national  
32 survey of US adults. *PloS One* 2019;14(10). doi: 10.1371/journal.pone.0222577. eCollection  
33  
34  
35  
36  
37  
38 66. Corroon JM, Jr., Mischley LK, Sexton M. Cannabis as a substitute for prescription drugs - a  
39 cross-sectional study. *J Pain Res* 2017;10:989-98. doi: 10.2147/jpr.s134330.  
40  
41  
42  
43 67. Reiman A, Welty M, Solomon P. Cannabis as a Substitute for Opioid-Based Pain  
44 Medication: Patient Self-Report. *Cannabis Cannabinoid Res* 2017;2(1):160-6. doi:  
45  
46  
47  
48  
49 68. The National Institute for Health and Care Excellence (NICE) Cannabis-based medicinal  
50 products (NG144). 2019(Available at:  
51  
52  
53  
54  
55  
56  
57  
58  
59  
60

- 1  
2  
3 <https://www.nice.org.uk/guidance/ng144/chapter/Recommendations#chronic-pain> [accessed  
4  
5 21 May 2021]).  
6  
7
- 8 69. Mulla SM, Maqbool A, Sivananthan L, et al. Reporting of IMMPACT-recommended core  
9  
10 outcome domains among trials assessing opioids for chronic non-cancer pain. *Pain*  
11  
12 2015;156(9):1615-9. doi: 10.1097/j.pain.0000000000000241.  
13  
14
- 15 70. Frank JW, Carey E, Nolan C, et al. Association Between Opioid Dose Reduction Against  
16  
17 Patients' Wishes and Change in Pain Severity. *J Gen Intern Med* 2020;35(Suppl 3):910-7.  
18  
19 doi: 10.1007/s11606-020-06294-z.  
20  
21
- 22 71. Busse JW, Juurlink D, Guyatt GH. Addressing the limitations of the CDC guideline for  
23  
24 prescribing opioids for chronic noncancer pain. *CMAJ* 2016;188(17-18):1210-1. doi:  
25  
26 10.1503/cmaj.161023.  
27  
28
- 29 72. Wang L, Hong PJ, May C, et al. Medical cannabis or cannabinoids for chronic pain: a  
30  
31 systematic review and meta-analysis of randomized clinical trials. *BMJ* 2021 (Accepted for  
32  
33 publication).  
34  
35
- 36 73. Zeraatkar D, Cooper MA, Agarwal A, et al. Long-term and serious harms of medical  
37  
38 cannabis or cannabinoids for chronic pain: A systematic review of non-randomized studies.  
39  
40 *BMJ Open* 2021 (submitted).  
41  
42
- 43 74. Zeng L, Lytvyn L, Wang X, et al. Values and preferences towards medical cannabis or  
44  
45 cannabinoids among patients with chronic pain: A mixed methods systematic review. *BMJ*  
46  
47 *Open* 2021 (accepted for publication).  
48  
49  
50  
51  
52  
53  
54  
55  
56  
57  
58  
59  
60



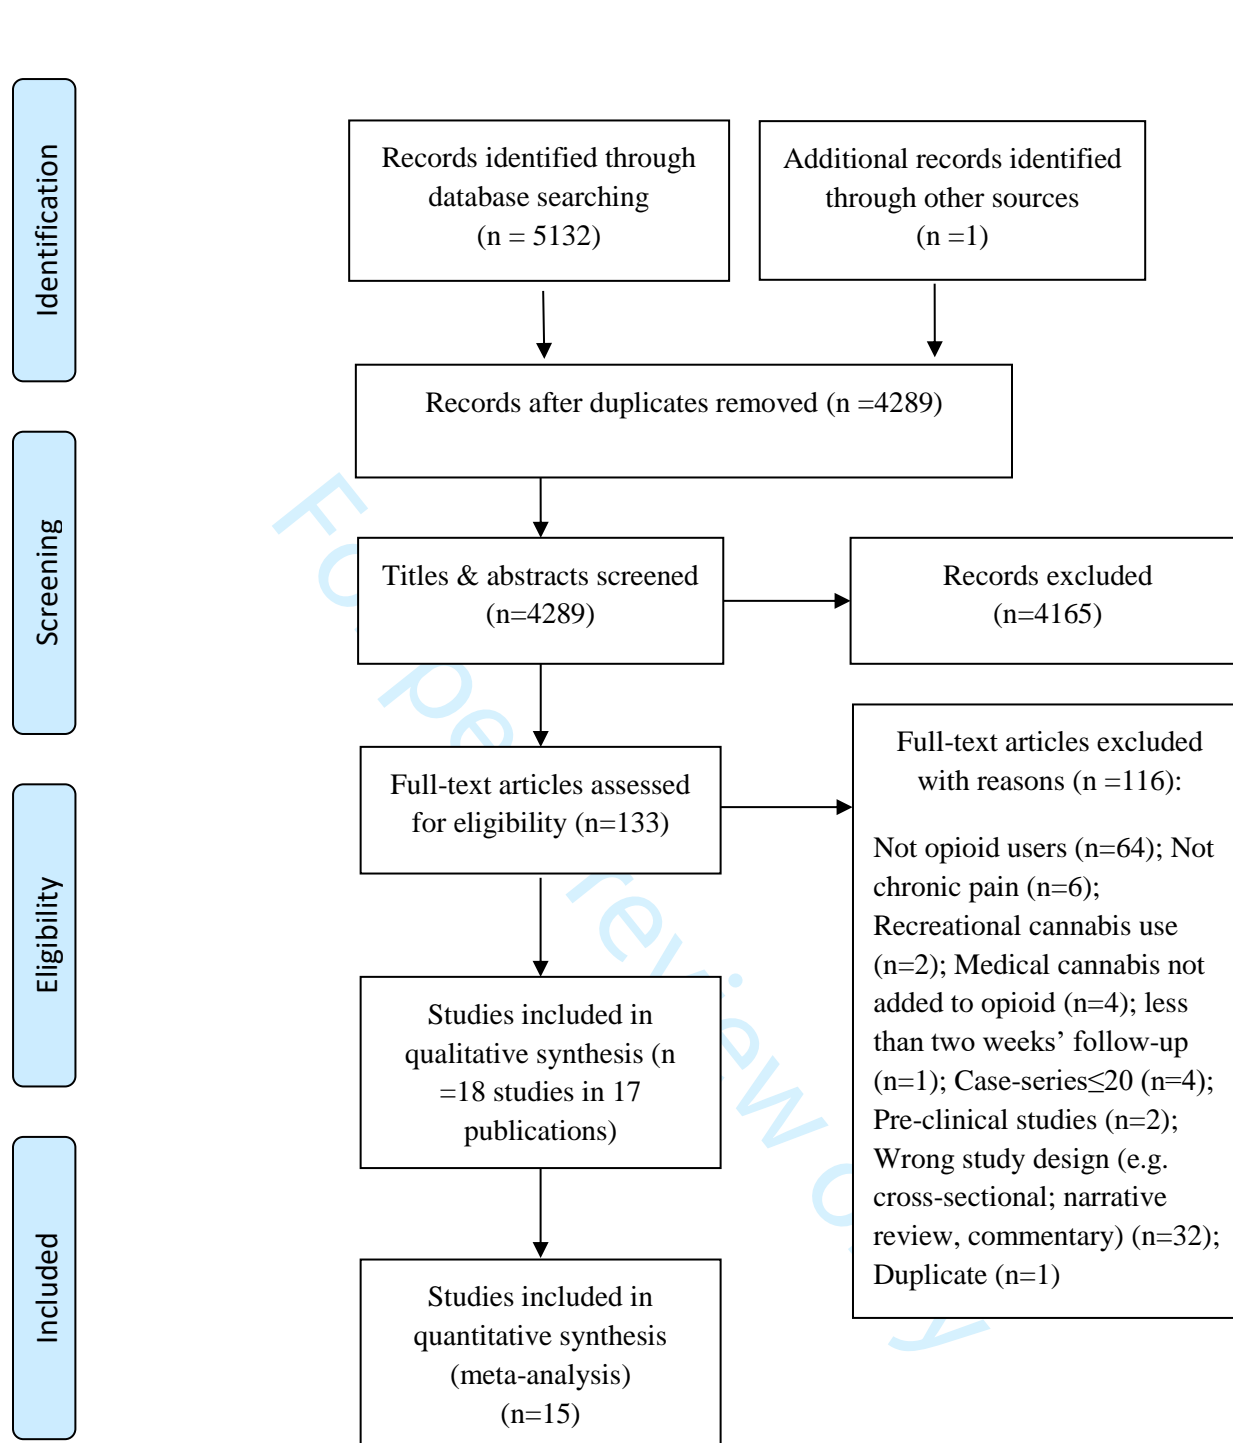

Figure 1: Study selection process in review of opioid-sparing effects of cannabis in chronic pain

## Supplementary Material

## Opioid-sparing effects of cannabis for chronic pain: A systematic review and meta-analysis of randomized and observational studies

### Contents

|                                                                                                                                                                                                          |    |
|----------------------------------------------------------------------------------------------------------------------------------------------------------------------------------------------------------|----|
| Appendix A: Literature Search Strategies .....                                                                                                                                                           | 3  |
| Supplement Table 1: Detailed guidance for risk of bias assessment RCTs .....                                                                                                                             | 9  |
| Supplement Table 2: Detailed guidance for risk of bias assessment retrospective or prospective chart-reviews with control group .....                                                                    | 12 |
| Supplement Table 3: Detailed guidance for risk of bias assessment retrospective or prospective chart-reviews with no control group .....                                                                 | 16 |
| Supplement Table 4: Characteristics of Eligible studies .....                                                                                                                                            | 18 |
| Supplement Table 5: Risk of bias assessment for RCTs .....                                                                                                                                               | 27 |
| Supplement Table 6: Risk of bias assessments for chart reviews with control group .....                                                                                                                  | 28 |
| Supplement Table 7: Risk of bias assessments for one-arm studies with no control group .....                                                                                                             | 29 |
| Table 8: Other reported outcomes in observational studies .....                                                                                                                                          | 30 |
| Sleep disturbance results from two observational studies .....                                                                                                                                           | 30 |
| Other reported outcomes in one observational study .....                                                                                                                                                 | 30 |
| Table 9: GRADE evidence profile of cannabis adjuvant to opioids vs. opioid alone for physical function among patients with chronic pain from 1 RCT .....                                                 | 31 |
| Table 10: GRADE evidence profile of cannabis adjuvant to opioids vs. opioid alone for emotional function among patients with chronic pain from 1 RCT .....                                               | 31 |
| Supplement Table 11: Summary of adverse events among included observational studies* .....                                                                                                               | 32 |
| Supplement Figure 1: forest plot for oral morphine equivalence dose reduction among patients with Chronic Pain who received cannabis adjuvant to opioids vs. opioid alone in RCTs .....                  | 34 |
| Supplement Figure 2: Subgroup analysis for opioid dose reduction and risk of bias (high risk vs. low risk) from 4 RCTs of Cannabis+opioids vs. placebo .....                                             | 35 |
| Supplement Figure 3: forest plot for oral morphine equivalence dose reduction among patients with Chronic Pain who received cannabis adjuvant to opioids vs. opioid alone in observational studies ..... | 36 |
| Supplement Figure 4: forest plot for pain relief on a 10-cm Visual Analog Scale (VAS) among patients with Chronic Pain who received cannabis adjuvant to opioids vs. opioid alone in RCTs .....          | 37 |

|    |                                                                                                           |    |
|----|-----------------------------------------------------------------------------------------------------------|----|
| 1  |                                                                                                           |    |
| 2  |                                                                                                           |    |
| 3  | Supplement Figure 5: Subgroup analysis for pain relief on a 10-cm VAS and risk of bias (high risk vs. low |    |
| 4  | risk) from 5 RCTs of Cannabis+opioids vs. placebo.....                                                    | 38 |
| 5  |                                                                                                           |    |
| 6  | Supplement Figure 6: forest plot for pain relief on a 10-cm VAS among patients with Chronic Pain who      |    |
| 7  | received cannabis adjuvant to opioids vs. opioid alone in observational studies with no control group .   | 39 |
| 8  |                                                                                                           |    |
| 9  | Supplement Figure 7: forest plot for sleep disturbance on a 10 cm VAS for sleep disturbance among         |    |
| 10 | patients with Chronic Pain who received cannabis adjuvant to opioids vs. opioid alone in RCTs .....       | 40 |
| 11 |                                                                                                           |    |
| 12 | Supplement Figure 8: Subgroup analysis for sleep disturbance a 10-cm VAS for sleep disturbance and risk   |    |
| 13 | of bias (high risk vs. low risk) from 5 RCTs of Cannabis+opioids vs. placebo .....                        | 41 |
| 14 |                                                                                                           |    |
| 15 | Supplement Figure 9: Risk difference of nausea among patients with Chronic Pain who received cannabis     |    |
| 16 | adjuvant to opioids vs. opioid alone in RCTs .....                                                        | 42 |
| 17 |                                                                                                           |    |
| 18 | Supplement Figure 10: Relative Risk of nausea among patients with Chronic Pain who received cannabis      |    |
| 19 | adjuvant to opioids vs. opioid alone in RCTs .....                                                        | 42 |
| 20 |                                                                                                           |    |
| 21 | Supplement Figure 11: Relative Risk of vomiting among patients with Chronic Pain who received             |    |
| 22 | cannabis adjuvant to opioids vs. opioid alone in RCTs .....                                               | 43 |
| 23 |                                                                                                           |    |
| 24 | Supplement Figure 12: Risk Difference of vomiting among patients with Chronic Pain who received           |    |
| 25 | cannabis adjuvant to opioids vs. opioid alone in RCTs .....                                               | 43 |
| 26 |                                                                                                           |    |
| 27 | Supplement Figure 13: Relative Risk of constipation among patients with Chronic Pain who received         |    |
| 28 | cannabis adjuvant to opioids vs. opioid alone in RCTs .....                                               | 44 |
| 29 |                                                                                                           |    |
| 30 | Supplement Figure 14: Risk difference of constipation among patients with Chronic Pain who received       |    |
| 31 | cannabis adjuvant to opioids vs. opioid alone in RCTs .....                                               | 44 |
| 32 |                                                                                                           |    |
| 33 | Appendix B: Reference List of Eligible studies .....                                                      | 45 |
| 34 |                                                                                                           |    |
| 35 | Technical Appendix.....                                                                                   | 47 |
| 36 |                                                                                                           |    |
| 37 |                                                                                                           |    |
| 38 |                                                                                                           |    |
| 39 |                                                                                                           |    |
| 40 |                                                                                                           |    |
| 41 |                                                                                                           |    |
| 42 |                                                                                                           |    |
| 43 |                                                                                                           |    |
| 44 |                                                                                                           |    |
| 45 |                                                                                                           |    |
| 46 |                                                                                                           |    |
| 47 |                                                                                                           |    |
| 48 |                                                                                                           |    |
| 49 |                                                                                                           |    |
| 50 |                                                                                                           |    |
| 51 |                                                                                                           |    |
| 52 |                                                                                                           |    |
| 53 |                                                                                                           |    |
| 54 |                                                                                                           |    |
| 55 |                                                                                                           |    |
| 56 |                                                                                                           |    |
| 57 |                                                                                                           |    |
| 58 |                                                                                                           |    |
| 59 |                                                                                                           |    |
| 60 |                                                                                                           |    |

## Appendix A: Literature Search Strategies

### Database: OVID Medline Epub Ahead of Print, In-Process & Other Non-Indexed Citations, Ovid MEDLINE(R) Daily and Ovid MEDLINE(R) 1946 to Present.

The search terminology included all types of chronic pain AND any kinds of cannabinoids:  
 .....

Database: OVID Medline Epub Ahead of Print, In-Process & Other Non-Indexed Citations,

Ovid MEDLINE(R) Daily and Ovid MEDLINE(R) 1946 to Present

Search Strategy:

-----

- 1 exp Analgesics, Opioid/ (111496)
- 2 opioid\*.mp. (112576)
- 3 (alfentanil or alphaprodine or beta-casomorphin\$ or buprenorphine or carfentanil or codeine or deltorphin or dextromethorphan or dezocine or dihydrocodeine or dihydromorphine or enkephalin\$ or ethylketocyclazocine or ethylmorphine or etorphine or fentanyl or heroin or hydrocodone or hydromorphone or ketobemidone or levorphanol or lofentanil or meperidine or meptazinol or methadone or methadyl acetate or morphine or nalbuphine or opium or oxycodone or oxymorphone or pentazocine or phenazocine or phenoperidine or pirinitramide or promedol or propoxyphene or remifentanil or sufentanil or tilidine or tapentadol).mp. [mp=title, abstract, original title, name of substance word, subject heading word, floating sub-heading word, keyword heading word, organism supplementary concept word, protocol supplementary concept word, rare disease supplementary concept word, unique identifier, synonyms] (150565)
- 4 or/1-3 (207118)
- 5 exp Narcotics/ (119511)
- 6 (adolonta or Anpec or Ardinex or Asimadoline or Alvimopam or amadol or biodalgi or biokanol or Codinovo or contramal or Demerol or Dicodid or Dihydrocodeinone or dihydromorphinone or dihydrohydroxycodone or dihydrone or dilaudid or dinarkon or dolsin or dolosal or dolin or dolantin or dolargan or dolcontral or duramorph or duromorph or duragesic or durogesic or eucodal or Fedotzine or Fentanest or Fentora or Fortral or Hycodan or Hycon or Hydrocodone or Hydrocodeinonebitartrate or hydromorphon or hydroxycodone or isocodeine or isonipeccain or jutadol or laudacon or l dromoran or levodroman or levorphan or levodromoran or levodromoran or lexir or lidol or lydol or morfin or morfine or morphia or morphin or morphinium or morphinene or morphium or ms contin or n-methylmorphine or n methylmorphine or nobligan or numorphan or oramorph or oxycodone or oxiconum or oxycone or oxycontin or palladone or pancodine or pethidine or phentanyl or prontosfort or robidone or skenan or sublimaze or sulfentanyl or sulfentanil or sufenta or takadol or talwin or theocodin or tramadol or tramadolhameln or tramador or tramadura or tramagetic or tramagit or tramake or tramal or tramex or tramundin or trasedal or theradol or tiral or topalgi or tradol or tradolpuren or tradonal or tralgiol or tramadorsch or tramadin or tramadoc or ultram or zamudol or zumalgi or zydol or zytram).mp. [mp=title, abstract, original title, name of substance word, subject heading word, floating sub-heading word, keyword heading word, organism

1  
2  
3 supplementary concept word, protocol supplementary concept word, rare disease  
4 supplementary concept word, unique identifier, synonyms] (10373)  
5  
6 7 or/1-6 (213683)  
7 Annotation: opioid block  
8 8 (Cannabis or cannabinol or cannabinoid\* or cannabidiol or bhang or cannador or  
9 charas or ganja or ganjah or hashish or hemp or marihuana or marijuana or nabilone or  
10 cesamet or cesametic or ajulemic acid or cannabichromene or cannabielsoin or  
11 cannabigerol or tetrahydrocannabinol or dronabinol or levonantradol or nabiximols or  
12 palmidrol or tetrahydrocannabinolic acid or tetrahydro cannabinol or marinol or  
13 tetranabinex or sativex or endocannabinoid\*).mp. [mp=title, abstract, original title,  
14 name of substance word, subject heading word, floating sub-heading word, keyword  
15 heading word, organism supplementary concept word, protocol supplementary concept  
16 word, rare disease supplementary concept word, unique identifier, synonyms] (52087)  
17  
18 9 Cannabis/ (8573)  
19 10 exp CANNABINOIDS/ (13258)  
20 11 8 or 9 or 10 (52087)  
21 Annotation: cannabis block  
22 12 7 and 11 (6089)  
23 Annotation: opioid and cannabis  
24 13 (chronic adj4 pain\*).mp. [mp=title, abstract, original title, name of  
25 substance word, subject heading word, floating sub-heading word, keyword heading  
26 word, organism supplementary concept word, protocol supplementary concept word, rare  
27 disease supplementary concept word, unique identifier, synonyms] (65717)  
28  
29 14 Chronic Pain/ (12620)  
30 15 exp Osteoarthritis/ (59676)  
31 16 osteoarthrit\*.mp. (84419)  
32 17 osteo-arthritis.mp. (375)  
33 18 exp Arthritis, Rheumatoid/ (109607)  
34 19 exp Neuralgia/ (19415)  
35 20 Diabetic Neuropathies/ (14247)  
36 21 (neuropath\* adj5 pain\*).mp. [mp=title, abstract, original title, name of  
37 substance word, subject heading word, floating sub-heading word, keyword heading  
38 word, organism supplementary concept word, protocol supplementary concept word, rare  
39 disease supplementary concept word, unique identifier, synonyms] (23043)  
40  
41 22 neuralg\*.mp. (26154)  
42 23 zoster.mp. (20386)  
43 24 Irritable Bowel Syndrome/ (6748)  
44 25 IBS.mp. (8435)  
45 26 Migraine Disorders/ (24388)  
46 27 migraine.mp. (37040)  
47 28 Fibromyalgia/ (8088)  
48 29 fibromyalg\*.mp. (11178)  
49 30 complex regional pain syndromes/ or exp causalgia/ or exp reflex sympathetic  
50 dystrophy/ (5426)  
51  
52 31 Pain, Intractable/ (6126)  
53 32 Phantom Limb/ (1816)  
54 33 Hyperalgesia/ (11136)  
55  
56  
57  
58  
59  
60

- 1  
2  
3 34 exp back pain/ or exp failed back surgery syndrome/ or exp low back pain/  
4 (37369)  
5 35 radiculopathy.mp. (8722)  
6 36 musculoskeletal pain/ or headache/ (29687)  
7 37 exp Headache Disorders/ (33178)  
8 38 headache\*.mp. (89612)  
9 39 exp Temporomandibular Joint Disorders/ (16711)  
10 40 whiplash.mp. or exp whiplash injury/ (3896)  
11 41 exp Cumulative Trauma Disorders/ (13326)  
12 42 exp Peripheral Nervous System Diseases/dt [Drug Therapy] (14079)  
13 43 Pain Measurement/de [Drug Effects] (6594)  
14 44 (backache\* or backpain\* or dorsalg\* or arthralgi\* or polyarthralgi\* or  
15 arthrodyni\* or myalgi\* or fibromyalgi\* or myodyni\* or neuralgi\* or ischialgi\* or crps  
16 or rachialgi\*).ab,ti. (43072)  
17 45 ((noncancer\* or non-cancer\* or back or discogen\* or chronic\* or recurrent or  
18 persist\* or bone or musculoskelet\* or muscle\* or skelet\* or spinal or spine or  
19 vertebra\* or joint\* or arthritis or Intestin\* or neuropath\* or neck or cervical\* or  
20 head or facial\* or complex or radicular or cervicobrachi\* or orofacial or somatic or  
21 non-malign\* or shoulder\* or knee\* or hip or hips) adj3 pain).mp. (206944)  
22 46 exp Pain/ (379991)  
23 47 pain\*.mp. (745044)  
24 48 or/13-47 (1122771)  
25 49 12 and 48 (1034)  
26  
27  
28  
29  
30

31 Database: Embase <1974 to 2019 September 04>

32 Search Strategy:  
33 -----

- 34 1 exp narcotic analgesic agent/ (317763)  
35 2 (opioid\* or opiate\*).mp. [mp=title, abstract, heading word, drug trade name,  
36 original title, device manufacturer, drug manufacturer, device trade name, keyword,  
37 floating subheading word, candidate term word] (188237)  
38 3 (alfentanil or alphaprodine or beta-casomorphin\$ or buprenorphine or  
39 carfentanil or codeine or deltorphin or dextromethorphan or dezocine or  
40 dihydrocodeine or dihydromorphine or enkephalin\$ or ethylketocyclazocine or  
41 ethylmorphine or etorphine or fentanyl or heroin or hydrocodone or hydromorphone or  
42 ketobemidone or levorphanol or lofentanil or meperidine or meptazinol or methadone or  
43 methadyl acetate or morphine or nalbuphine or opium or oxycodone or oxymorphone or  
44 pentazocine or phenazocine or phenoperidine or pirinitramide or promedol or  
45 propoxyphene or remifentanil or sufentanil or tilidine or tapentadol).mp. (278150)  
46 4 (adolonta or Anpec or Ardinex or Asimadoline or Alvimopam or amadol or  
47 biodalgic or biokanol or Codinovo or contramal or Demerol or Dicodid or  
48 Dihydrocodeinone or dihydromorphinone or dihydrohydroxycodone or dihydrone or  
49 dilaudid or dinarkon or dolsin or dolosal or dolin or dolantin or dolargan or  
50 dolcontral or duramorph or duromorph or duragesic or durogesic or eucodal or  
51 Fedotzine or Fentanest or Fentora or Fortral or Hycodan or Hycon or Hydrocodone or  
52 Hydrocodeinonebitartrate or hydromorphon or hydroxycodone or isocodeine or  
53 isonipecaïn or jutadol or laudacon or l dromoran or levodroman or levorphan or levo-

1  
2  
3 dromoran or levodromoran or lexir or lidol or lydol or morfin or morfine or morphia  
4 or morphin or morphinium or morphinene or morphium or ms contin or n-methylmorphine  
5 or n methylmorphine or nobligan or numorphan or oramorph or oxycodoinon or oxiconum  
6 or oxycone or oxycontin or palladone or pancodine or pethidine or phentanyl or  
7 prontosfort or robidone or skenan or sublimaze or sulfentanyl or sulfentanil or  
8 sufenta or takadol or talwin or theocodin or tramadol or tramadolhameln or tramador  
9 or tramadura or tramagetic or tramagit or tramake or tramal or tramex or tramundin or  
10 trasedal or theradol or tiral or topalgic or tradol or tradolpuren or tradonal or  
11 tralgiol or tramadorsch or tramadin or tramadoc or ultram or zamudol or zumalgic or  
12 zydol or zytram).mp. [mp=title, abstract, heading word, drug trade name, original  
13 title, device manufacturer, drug manufacturer, device trade name, keyword, floating  
14 subheading word, candidate term word] (50642)

15  
16 5 or/1-4 (403926)

17  
18 6 exp cannabis/ (32390)

19  
20 7 cannabinoid/ or cannabidiol/ or cannabinoid derivative/ or cannabiol/ or  
21 cannabiol derivative/ or cannabis derivative/ or delta8 tetrahydrocannabinol/ or  
22 delta8 tetrahydrocannabinol derivative/ or "delta9(11) tetrahydrocannabinol"/ or  
23 dronabinol/ or medical cannabis/ or nabiximols/ or tetrahydrocannabinol/ or  
24 tetrahydrocannabinol derivative/ or tetrahydrocannabinolic acid/ (26180)

25  
26 8 (Cannabis or cannabiol or cannabidiol or bhang or cannador or charas or ganja  
27 or ganjah or hashish or hemp or marihuana or marijuana or nabilone or cesamet or  
28 cesametic or ajulemic acid or cannabichromene or cannabielsoin or cannabigerol or  
29 tetrahydrocannabinol or dronabinol or levonantradol or nabiximols or palmidrol or  
30 tetrahydrocannabinolic acid or tetrahydro cannabiol or marinol or tetranabinex or  
31 sativex or endocannabinoid\*).mp. [mp=title, abstract, heading word, drug trade name,  
32 original title, device manufacturer, drug manufacturer, device trade name, keyword,  
33 floating subheading word, candidate term word] (69860)

34  
35 9 6 or 7 or 8 (75281)

36  
37 10 5 and 9 (16412)

38  
39 11 (chronic adj4 pain\*).mp. [mp=title, abstract, heading word, drug trade name,  
40 original title, device manufacturer, drug manufacturer, device trade name, keyword,  
41 floating subheading word, candidate term word] (109897)

42  
43 12 chronic pain/ (57642)

44  
45 13 exp osteoarthritis/ (122475)

46  
47 14 osteoarthritis\*.mp. (136019)

48  
49 15 osteo-arthritis.mp. (424)

50  
51 16 degenerative arthrit\*.mp. (1563)

52  
53 17 exp rheumatoid arthritis/ (194747)

54  
55 18 exp neuralgia/ (99958)

56  
57 19 diabetic neuropathy/ (22699)

58  
59 20 (neuropath\* adj5 (pain\* or diabet\*)).mp. (71799)

60  
21 neuralg\*.mp. (29200)

22 zoster.mp. (36684)

23 irritable colon/ (24792)

24 (Irritable Bowel Syndrome or IBS).mp. [mp=title, abstract, heading word, drug  
trade name, original title, device manufacturer, drug manufacturer, device trade  
name, keyword, floating subheading word, candidate term word] (24025)

25 exp migraine/ (60235)

- 1  
2  
3 26 migraine.mp. (66593)  
4 27 fibromyalgia/ (19402)  
5 28 fibromyalg\*.mp. (20958)  
6 29 reflex sympathetic dystrophy.mp. (2356)  
7 30 (complex regional pain syndromes or causalgia).mp. (1275)  
8 31 intractable pain/ (4701)  
9 32 phantom limb.mp. or agnosia/ or phantom pain/ or amputation stump/ (7388)  
10 33 hyperalgesia/ (18711)  
11 34 ((noncancer\* or non-cancer\* or chronic\* or recurrent or persist\* or non-  
12 malign\*) adj3 pain).mp. (27031)  
13 35 exp backache/ (104042)  
14 36 radiculopathy.mp. or exp radiculopathy/ (37176)  
15 37 musculoskeletal pain/ (10292)  
16 38 exp arthralgia/ (58208)  
17 39 headache/ (204055)  
18 40 headache\*.mp. (264831)  
19 41 temporomandibular joint disorder/ (13308)  
20 42 ((TMJ or TMJD) and pain\*).mp. (3648)  
21 43 whiplash.mp. or whiplash injury/ (4815)  
22 44 exp cumulative trauma disorder/ (20089)  
23 45 exp pain/ (1249315)  
24 46 pain\*.mp. (1280762)  
25 47 or/11-46 (1963522)  
26 48 10 and 47 (3115)

31 Search Name: cannabis pain  
32 Date Run: 05/09/2019 16:12:03  
33 Comment:  
34

35 ID Search Hits  
36 #1 MeSH descriptor: [Cannabis] explode all trees 293  
37 #2 MeSH descriptor: [Cannabinoids] explode all trees 743  
38 #3 MeSH descriptor: [Endocannabinoids] explode all trees 46  
39 #4 MeSH descriptor: [Endocannabinoids] explode all trees 46  
40 #5 (Cannabis or cannabinol or cannabinoid\* or cannabidiol or bhang or cannador or charas or ganja  
41 or ganjah or hashish or hemp or marihuana or marijuana or nabilone or cesamet or cesametic or  
42 ajulemic acid or cannabichromene or cannabielsoin or cannabigerol or tetrahydrocannabinol or  
43 dronabinol or levonantradol or nabiximols or palmidrol or tetrahydrocannabinolic acid or tetrahydro  
44 cannabinol or marinol or tetranabinex or sativex or endocannabinoid\*):ti,ab,kw (Word variations have  
45 been searched) 4215  
46 #6 #1 or #2 or #3 or #4 or #5 4215  
47 #7 MeSH descriptor: [Pain] explode all trees 45094  
48 #8 (pain\*):ti,ab,kw (Word variations have been searched) 164064  
49 #9 #7 or #8 169846  
50 #10 #6 and #9 578  
51 #11 [mh Osteoarthritis] or [mh ^"Arthritis, Rheumatoid"] or [mh Neuralgia] or [mh ^"Diabetic  
52 Neuropathies"] or [mh ^"Irritable Bowel Syndrome"] or [mh ^"Migraine Disorders"] or [mh  
53 Fibromyalgia] or [mh ^"complex regional pain syndromes"] or [mh causalgia] or [mh ^"reflex  
54  
55  
56  
57  
58  
59  
60



1  
2  
3 sympathetic dystrophy"] or [mh ^"pain Intractable"] or [mh ^"Phantom Limb"] or [mh Hyperalgesia] or  
4 [mh ^"back pain"] or [mh ^"failed back surgery syndrome"] or [mh ^"low back pain"] or [mh  
5 Radiculopathy] or [mh ^"musculoskeletal pain"] or [mh headache] or [mh Arthralgia] or [mh ^"Headache  
6 Disorders"] or [mh ^"Temporomandibular Joint Dysfunction Syndrome"] or [mh ^"whiplash injury"] or  
7 [mh ^"Cumulative Trauma Disorders"] or [mh "Peripheral Nervous System Diseases"/DT] or [mh ^"Pain  
8 Measurement"/DE] 28499

9  
10 #12 (osteoarthritis\* or osteo-arthritis or arthritis\* or neuropath\* or neuralgi\* or zoster\* or migraine\*  
11 or headache\* or fibromyalgi\* or causalgia or radiculopathy\* or whiplash or backache\* or backpain\* or  
12 dorsalg\* or arthralgi\* or polyarthralgi\* or arthrodyni\* or myalgi\* or myodyn\* or ischialgi\* or crps or  
13 rachialgi\* or TMJ or TMJD or IBS or crohn\* or colitis\* or enteritis\* or ileitis\*) 104465

14 #13 (irrita\* or inflam\*) near/4 (bowel or colon) 7249

15 #14 #11 or #12 or #13 113256

16 #15 #6 and #14 in Trials 353

1  
2  
3 **Characteristics of eligible studies and Risk of Bias Assessment**  
4  
5  
6

7 **Supplement Table 1: Detailed guidance for risk of bias assessment RCTs**

| Domain                                                                                                                                                                                                                                                                                                                     | Judgment                                                                                                                                                                                                                                                                                                                                                                                                                                                                                                                                                                               |
|----------------------------------------------------------------------------------------------------------------------------------------------------------------------------------------------------------------------------------------------------------------------------------------------------------------------------|----------------------------------------------------------------------------------------------------------------------------------------------------------------------------------------------------------------------------------------------------------------------------------------------------------------------------------------------------------------------------------------------------------------------------------------------------------------------------------------------------------------------------------------------------------------------------------------|
| <p>8 <b>Random allocation concealment</b></p> <p>9</p> <p>10</p> <p>11</p> <p>12</p> <p>13</p> <p>14</p> <p>15</p> <p>16</p> <p>17</p> <p>18</p> <p>19</p> <p>20</p> <p>21</p> <p>22</p> <p>23</p> <p>24</p> <p>25</p> <p>26</p> <p>27</p> <p>28</p> <p>29</p> <p>30</p> <p>31</p> <p>32</p> <p>33</p> <p>34</p> <p>35</p> | <p><b>Definitely yes (low risk):</b> used central allocations (e.g. computer, telephone)</p> <p><b>Probably yes (low risk):</b> sequentially numbered, opaque, sealed envelopes; studies did not provide enough information about concealment approach; however, it was placebo-control trial with double blinded design.</p> <p><b>Probably no (high risk):</b> not enough information was provided and study was not blinded.</p> <p><b>Definitely no (high risk):</b> used any unconcealed approach of allocation (e.g. case record number, day of week, health-care decision).</p> |
| <p>36 <b>Blinding of patients</b></p> <p>37</p> <p>38</p> <p>39</p> <p>40</p> <p>41</p> <p>42</p> <p>43</p> <p>44</p> <p>45</p> <p>46</p> <p>47</p> <p>48</p> <p>49</p> <p>50</p> <p>51</p> <p>52</p> <p>53</p> <p>54</p> <p>55</p> <p>56</p> <p>57</p> <p>58</p> <p>59</p> <p>60</p>                                      | <p><b>Definitely yes (low risk):</b> explicitly mentioned that patients were blinded</p> <p><b>Probably yes (low risk):</b> a placebo-controlled double-blinded trial.</p> <p><b>Probably no (high risk):</b> no explicit statement about blinding status and not double-blinded placebo-controlled trial.</p> <p><b>Definitely no (high risk):</b> explicitly mentioned that patients were not blinded.</p>                                                                                                                                                                           |

|                                                 |                                                                                                                                                                                                                                                                                                                                                           |
|-------------------------------------------------|-----------------------------------------------------------------------------------------------------------------------------------------------------------------------------------------------------------------------------------------------------------------------------------------------------------------------------------------------------------|
| <p><b>Blinding of health care providers</b></p> | <p><b>Definitely yes (low risk):</b> explicitly mentioned that this group was blinded.</p> <p><b>Probably yes (low risk):</b> mentioned that it was a double-blinded study; mentioned investigator were blinded.</p> <p><b>Probably no (high risk)</b></p> <p><b>Definitely no (high risk):</b> explicitly mentioned that this group was not blinded.</p> |
| <p><b>Blinding of data collector</b></p>        | <p><b>Definitely yes (low risk):</b> explicitly mentioned that this group was blinded.</p> <p><b>Probably yes (low risk):</b> mentioned that it was a double-blinded study; mentioned investigator were blinded.</p> <p><b>Probably no (high risk)</b></p> <p><b>Definitely no (high risk):</b> explicitly mentioned that this group was not blinded.</p> |
| <p><b>Blinding of outcome assessor</b></p>      | <p><b>Definitely yes (low risk):</b> explicitly mentioned that this group was blinded.</p> <p><b>Probably yes (low risk):</b> mentioned that it was a double-blinded study.</p> <p><b>Probably no (high risk)</b></p> <p><b>Definitely no (high risk):</b> explicitly mentioned that this group was not blinded; open-blinded or unblinded trial.</p>     |
| <p><b>Blinding data analyst</b></p>             | <p><b>Definitely yes (low risk):</b> explicitly mentioned that this group were blinded</p>                                                                                                                                                                                                                                                                |

|                                 |                                                                                                                                                                                                                                                                                                                                                                                                                                                                                                                      |
|---------------------------------|----------------------------------------------------------------------------------------------------------------------------------------------------------------------------------------------------------------------------------------------------------------------------------------------------------------------------------------------------------------------------------------------------------------------------------------------------------------------------------------------------------------------|
|                                 | <p><b>Probably yes (low risk):</b></p> <p><b>Probably no (high risk):</b> no explicit statement about blinding and only mentioned double-blinded.</p> <p><b>Definitely no (high risk):</b> explicitly mentioned that this group was not blinded; open-blinded or unblinded trial.</p>                                                                                                                                                                                                                                |
| <p><b>Loss to follow-up</b></p> | <p><b>Definitely yes:</b> the retention rate was at least 90% through the study.</p> <p><b>Probably yes (low risk):</b> the retention rate approximately 80-89% and loss to follow-up unlikely to be related to the outcome, or missing outcome data were balanced across groups.</p> <p><b>Probably no (high risk):</b> the retention rate approximately 80-89%, however its rate likely to be related to the loss to follow-up.</p> <p><b>Definitely no (high risk):</b> the retention rate was less than 80%.</p> |
| <p><b>Sample size</b></p>       | <p>We also considered the sample size lower than 300 for continuous as high risk of bias and rated down on the basis of imprecision in GRADE assessment.</p>                                                                                                                                                                                                                                                                                                                                                         |

**Supplement Table 2: Detailed guidance for risk of bias assessment retrospective or prospective chart-reviews with control group**

| Domain                                                                                                                                                                                                                                                                                                        | Judgment                                                                                                                                                                                                                                                                                                                                                                                                                                                                                                                                            |
|---------------------------------------------------------------------------------------------------------------------------------------------------------------------------------------------------------------------------------------------------------------------------------------------------------------|-----------------------------------------------------------------------------------------------------------------------------------------------------------------------------------------------------------------------------------------------------------------------------------------------------------------------------------------------------------------------------------------------------------------------------------------------------------------------------------------------------------------------------------------------------|
| <p><b>1) Did the study match participants for all variables that are associated with the outcome of interest or did the statistical analysis adjust for these prognostic variables?</b> (This item queries how confident we are that the reported association or lack thereof is not due to confounding).</p> | <p><b>Definitely yes (low risk):</b><br/>studies that adjusted based on all important covariates including age, sex, baseline pain, baseline opioid dose, and other disabilities.</p> <p><b>Probably yes (low risk):</b><br/>studies that adjusted at a minimum for baseline pain and baseline opioid dose.</p> <p><b>Probably no (high risk):</b><br/>studies that did not provide any details about analysis method.</p> <p><b>Definitely no (high risk):</b><br/>Studies that did not adjust based on baseline opioid dose or baseline pain.</p> |
| <p><b>2) Was selection of exposed and non-exposed cohorts drawn from the same population?</b> (this item queries whether participants who co-used cannabis and opioids or used opioids alone were drawn from the same population)</p>                                                                         | <p><b>Definitely yes (low risk):</b><br/>Studies in which selection for participation is not dependent on exposure status (cannabis and opioid co-use).</p> <p><b>Probably yes (low risk):</b><br/>studies that did not provide enough information about recruitment to judge whether recruitment into the study was dependent on exposure status or not.</p> <p><b>Probably no (high risk):</b> NA</p>                                                                                                                                             |

|                                                                                                                                                                       |                                                                                                                                                                                                                                                                                                                                                                                                                                                                                                                                                                                                                                                                                                                                                   |
|-----------------------------------------------------------------------------------------------------------------------------------------------------------------------|---------------------------------------------------------------------------------------------------------------------------------------------------------------------------------------------------------------------------------------------------------------------------------------------------------------------------------------------------------------------------------------------------------------------------------------------------------------------------------------------------------------------------------------------------------------------------------------------------------------------------------------------------------------------------------------------------------------------------------------------------|
|                                                                                                                                                                       | <p><b>Definitely no (high risk):</b> studies that compared cannabis and opioid co-users and non-users from different cohort.</p>                                                                                                                                                                                                                                                                                                                                                                                                                                                                                                                                                                                                                  |
| <p><b>3) Can we be confident in the assessment of exposure?</b> (this item queries how confident we are about the quantification of cannabis and opioids co-use).</p> | <p><b>Definitely yes (low risk):</b> if study reported some ascertainment methods for cannabis use (e.g. urine analysis), or study prescribed the specific dose of medical cannabis to the participants.</p> <p><b>Probably yes (low risk):</b> self-report of cannabis use.</p> <p><b>Probably no (high risk):</b> when study did not provide any details about assessing exposure status.</p> <p><b>Definitely no (high risk):</b> participants self-reported cannabis usage only at baseline, or exposure status not assessed during the 4-weeks follow-up at least one time, or level of cannabis usage was not similar among participants. For example, some studies allowed patients to select the type or dose of cannabis themselves.</p> |
| <p><b>4) Can we be confident in the assessment of the presence or absence of prognostic factors?</b></p>                                                              | <p><b>Definitely yes (low risk):</b> when patients self-reported the prognostic factors.</p> <p><b>Probably yes (low risk):</b> when the method of assessment was not reported, it was considered as probably yes.</p> <p>*Note that for this item, we are only concerned with the measurement of the prognostic</p>                                                                                                                                                                                                                                                                                                                                                                                                                              |

|                                                                                                                                                                                     |                                                                                                                                                                                                                                                                                                                                                                                                                                                                                                                                                                                     |
|-------------------------------------------------------------------------------------------------------------------------------------------------------------------------------------|-------------------------------------------------------------------------------------------------------------------------------------------------------------------------------------------------------------------------------------------------------------------------------------------------------------------------------------------------------------------------------------------------------------------------------------------------------------------------------------------------------------------------------------------------------------------------------------|
|                                                                                                                                                                                     | factors that mentioned in item number 1 as minimum adjusted variables (baseline pain intensity and opioid dose).                                                                                                                                                                                                                                                                                                                                                                                                                                                                    |
| <p>5) <b>Were co-interventions similar between groups?</b> (this item queries how similar are the use of other pain killers (e.g. NSAIDs) between cannabis users and non-users.</p> | <p><b>Definitely yes (low risk):</b> study reported that co-intervention other than study intervention were limited during the study period.</p> <p><b>Probably yes (low risk):</b> when co-intervention usage was approximately balanced between both intervention and control groups.</p> <p><b>Probably no (high risk):</b> when study did not provide enough information about other drugs that participants may use.</p> <p><b>Definitely no (high risk):</b> when participants were allowed to use all other co-interventions that could affect the outcome of the study.</p> |
| <p>6) <b>Was the follow up of cohorts adequate?</b> (This item queries the risk of bias associated with loss to follow-up and missing outcome data).</p>                            | <p><b>Definitely yes (low risk):</b> the retention rate was at least 90% through the study.</p> <p><b>Probably yes (low risk):</b> the retention rate approximately 80-89% and loss to follow-up unlikely to be related to the outcome.</p> <p><b>Probably no (high risk):</b> the retention rate approximately 80-89%, however its rate likely to be related to the loss to follow-up. For instance, if patients were required to come to clinic for</p>                                                                                                                           |

|                                                                                                                                                          |                                                                                                                                                                                                                                                                                                                                                                                                                                                                                            |
|----------------------------------------------------------------------------------------------------------------------------------------------------------|--------------------------------------------------------------------------------------------------------------------------------------------------------------------------------------------------------------------------------------------------------------------------------------------------------------------------------------------------------------------------------------------------------------------------------------------------------------------------------------------|
|                                                                                                                                                          | <p>outcome measurement, patients who had poorer outcomes, or on the other hand, patients who were feeling better, may be less likely to attend the clinic.</p> <p>Loss to follow-up did not report or could not estimate.</p> <p><b>Definitely no (high risk):</b> loss to follow-up more than 20%.</p>                                                                                                                                                                                    |
| <p>7) <b>Can we be confident in the assessment of outcome?</b> (This item queries our confidence in the accuracy of the measurement of the outcome).</p> | <p><b>Definitely yes (low risk):</b> study used a validated/reliable measurement for pain assessment (e.g. VAS, NRS); reported opioid dose in a morphine equivalence dose by assessing patients' medical or prescription records.</p> <p><b>Probably yes (low risk):</b> NA</p> <p><b>Probably no (high risk):</b> when study did not provide enough information about the outcome measurement.</p> <p><b>Definitely no (high risk):</b> study used non-validated/reliable instrument.</p> |



**Supplement Table 3: Detailed guidance for risk of bias assessment retrospective or prospective chart-reviews with no control group**

| Domain                                                                                            | Judgment                                                                                                                                                                                                                                                                                                                                                                                                                                                                                                                                                               |
|---------------------------------------------------------------------------------------------------|------------------------------------------------------------------------------------------------------------------------------------------------------------------------------------------------------------------------------------------------------------------------------------------------------------------------------------------------------------------------------------------------------------------------------------------------------------------------------------------------------------------------------------------------------------------------|
| <p><b>Is the source population (sampling frame) representative of the general population?</b></p> | <p><b>Definitely yes (low risk):</b> participants were selected from a representative sample (e.g. national population registry)</p> <p><b>Probably yes (low risk):</b> single community center, however the center was the only referral center that provided cannabis legally to participants.</p> <p><b>Probably no (high risk):</b> based on the provided information source population could not be defined.</p> <p><b>Definitely no (high risk):</b> sampling from one center or clinic or hospital or patients selected through using convenience sampling.</p> |
| <p><b>Is the assessment of the outcome accurate both at baseline and at follow-up?</b></p>        | <p><b>Definitely yes (low risk):</b> study used a validated/reliable measurement for pain assessment (e.g. VAS, NRS); reported opioid dose in a morphine equivalence dose by assessing patients' medical or prescription records.</p> <p><b>Probably yes (low risk):</b> NA</p> <p><b>Probably no (high risk):</b> when study did not provide enough information about the outcome measurement.</p> <p><b>Definitely no (high risk):</b> used of different instruments at different follow-up intervals with concern of</p>                                            |

|                                      |                                                                                                                                                                                                                                                                                                                                                                                                                                                                                                                                                                                                                                                                                                                                                            |
|--------------------------------------|------------------------------------------------------------------------------------------------------------------------------------------------------------------------------------------------------------------------------------------------------------------------------------------------------------------------------------------------------------------------------------------------------------------------------------------------------------------------------------------------------------------------------------------------------------------------------------------------------------------------------------------------------------------------------------------------------------------------------------------------------------|
|                                      | accuracy of responses, or used invalidated/reliable instruments.                                                                                                                                                                                                                                                                                                                                                                                                                                                                                                                                                                                                                                                                                           |
| <b>Is there little missing data?</b> | <p><b>Definitely yes (low risk):</b> the retention rate was at least 90% through the study.</p> <p><b>Probably yes (low risk):</b> the retention rate approximately 80-89% and loss to follow-up unlikely to be related to the outcome.</p> <p><b>Probably no (high risk):</b> the retention rate approximately 80-89%, however its rate likely to be related to the loss to follow-up. For instance, if patients were required to come to clinic for outcome measurement, patients who had poorer outcomes, or on the other hand, patients who were feeling better, may be less likely to attend the clinic.</p> <p>Loss to follow-up did not report or could not estimate.</p> <p><b>Definitely no (high risk):</b> loss to follow-up more than 20%.</p> |

## Supplement Table 4: Characteristics of Eligible studies

### Barlowe et al-2019<sup>1</sup>

|                                  |                                                                                                                                                                  |
|----------------------------------|------------------------------------------------------------------------------------------------------------------------------------------------------------------|
| <b>Study design</b>              | Retrospective chart review.                                                                                                                                      |
| <b>Participants</b>              | 34 chronic painful pancreatitis patients with chronic use of opioids enrolled in a state therapeutic cannabis program were compared to 19 non-enrolled patients. |
| <b>Intervention (comparison)</b> | medical cannabis added to opioids (no cannabis).                                                                                                                 |
| <b>Follow-up</b>                 | Cohort of patients who enrolled into the program had received cannabis therapy with a range from 34 to 297 weeks.                                                |
| <b>Funding source</b>            | No industry funding reported.                                                                                                                                    |
| <b>Outcome</b>                   | -Reduction of opioid (calculated in average daily intravenous [IV] morphine equivalence dosages)                                                                 |

### Bellnier et al-2018<sup>2</sup>

|                                  |                                                                                                                                                             |
|----------------------------------|-------------------------------------------------------------------------------------------------------------------------------------------------------------|
| <b>Study design</b>              | One-arm observational study (before/after).                                                                                                                 |
| <b>Participants</b>              | 29 patients with chronic pain who used opioids enrolled in a state therapeutic cannabis program.                                                            |
| <b>Intervention (comparison)</b> | medical cannabis added to opioids (no cannabis).                                                                                                            |
| <b>Follow-up</b>                 | 13 weeks                                                                                                                                                    |
| <b>Funding source</b>            | Not reported.                                                                                                                                               |
| <b>Outcome</b>                   | -Reduction of opioid (calculated in average daily intravenous [IV] morphine equivalence dosages)<br>-Pain Quality Assessment Scale (PQAS) paroxysmal domain |

### Capano et al-2020<sup>3</sup>

|                                  |                                                                                             |
|----------------------------------|---------------------------------------------------------------------------------------------|
| <b>Study design</b>              | One-arm observational study (before/after).                                                 |
| <b>Participants</b>              | 131 patients with chronic pain who used opioids enrolled in a pain clinic cannabis therapy. |
| <b>Intervention (comparison)</b> | medical cannabis added to opioids (no cannabis).                                            |
| <b>Follow-up</b>                 | 8 weeks                                                                                     |
| <b>Funding source</b>            | Industry fund reported.                                                                     |

|                |                                                                                                                                                                                                                                                                                                |
|----------------|------------------------------------------------------------------------------------------------------------------------------------------------------------------------------------------------------------------------------------------------------------------------------------------------|
| <b>Outcome</b> | <ul style="list-style-type: none"> <li>- Reduction of opioid use (reported as percentage of patients who reduced their opioid use after 8 weeks).</li> <li>- Pain disability index</li> <li>- Pittsburgh Sleep Quality Index</li> <li>- Pain intensity and interference index (PEG)</li> </ul> |
|----------------|------------------------------------------------------------------------------------------------------------------------------------------------------------------------------------------------------------------------------------------------------------------------------------------------|

#### Haroutounian et al-2016<sup>4</sup>

|                                  |                                                                                                                                                                                                                                                                                                         |
|----------------------------------|---------------------------------------------------------------------------------------------------------------------------------------------------------------------------------------------------------------------------------------------------------------------------------------------------------|
| <b>Study design</b>              | One-arm observational study (before/after).                                                                                                                                                                                                                                                             |
| <b>Participants</b>              | Chronic non-cancer pain (14 individuals had pain due to cancer) with a duration of 3 months or longer, and a lack of satisfactory analgesic response or intolerable adverse effects with at least 2 analgesics from 2 different drug classes at full dose (Opioid user: N=73; 35%).                     |
| <b>Intervention (comparison)</b> | The initial recommended medical cannabis dose was 20 g/mo added to opioids, which could be obtained as smoked cannabis, baked cookies or oil taking from cannabis dispensary centers. Cannabis could be titrated up to 3 times a day until satisfactory pain relief was gained (before using cannabis). |
| <b>Follow-up</b>                 | 26 weeks.                                                                                                                                                                                                                                                                                               |
| <b>Funding source</b>            | No industry funding reported.                                                                                                                                                                                                                                                                           |
| <b>Outcome</b>                   | - Reduction of opioid (calculated in median daily intravenous [IV] morphine equivalence dosages among opioid users).                                                                                                                                                                                    |

#### Maida et al-2008<sup>5</sup>

|                                  |                                                                                                                               |
|----------------------------------|-------------------------------------------------------------------------------------------------------------------------------|
| <b>Study design</b>              | Prospective cohort study.                                                                                                     |
| <b>Participants</b>              | 47 patients with chronic cancer pain who were opioid user and treated with nabilone were compared to 65 non-treated patients. |
| <b>Intervention (comparison)</b> | nabilone added to opioids (no nabilone).                                                                                      |
| <b>Follow-up</b>                 | 4 weeks.                                                                                                                      |
| <b>Funding source</b>            | Industry funding reported.                                                                                                    |

|                |                                                                                                                                                                                                                |
|----------------|----------------------------------------------------------------------------------------------------------------------------------------------------------------------------------------------------------------|
| <b>Outcome</b> | -Reduction of opioid (calculated in average daily morphine equivalence dosages);<br><br>-Pain reduction (Edmonton Symptom Assessment System 0: no pain-10: most severe pain);<br>-anxiety, nausea, depression. |
|----------------|----------------------------------------------------------------------------------------------------------------------------------------------------------------------------------------------------------------|

### Narange et al-2008<sup>6</sup>

|                                  |                                                                                                                                                                                                                          |
|----------------------------------|--------------------------------------------------------------------------------------------------------------------------------------------------------------------------------------------------------------------------|
| <b>Study design</b>              | Phase II: One-arm observational study (before/after).                                                                                                                                                                    |
| <b>Participants</b>              | 30 patients with chronic non-cancer pain who were taking opioids for a long time.                                                                                                                                        |
| <b>Intervention (comparison)</b> | The starting dose was 5mg of dronabinol twice daily and titrated up to 20 mg 3 times a day added to opioids (before using dronabinol).                                                                                   |
| <b>Follow-up</b>                 | 4 weeks                                                                                                                                                                                                                  |
| <b>Funding source</b>            | Industry funding reported.                                                                                                                                                                                               |
| <b>Outcome</b>                   | -Pain reduction (VAS 0: no pain-10: most severe pain);<br>-pain interfere with sleep (Brief pain inventory)<br><br>-sleep disturbance<br><br>-adverse events including anxiety, dizziness, and inability to concentrate. |

### O'Connell et al-2019<sup>7</sup>

|                                  |                                                                                                   |
|----------------------------------|---------------------------------------------------------------------------------------------------|
| <b>Study design</b>              | One-arm observational study (before/after).                                                       |
| <b>Participants</b>              | 77 mixed type of chronic non-cancer pain patients who used opioids (96%) or benzodiazepines.      |
| <b>Intervention (comparison)</b> | Medical cannabis including THC, CBD products added to opioid (before using cannabis)              |
| <b>Follow-up</b>                 | 26 weeks                                                                                          |
| <b>Funding source</b>            | No industry funding reported.                                                                     |
| <b>Outcome</b>                   | - Reduction of opioid (calculated in mean daily morphine equivalence dosages among opioid users). |

-pain reduction (VAS 0: no pain-10: most severe pain).

### Pritchard-2019<sup>8</sup>

|                                  |                                                                                                                                                                            |
|----------------------------------|----------------------------------------------------------------------------------------------------------------------------------------------------------------------------|
| <b>Study design</b>              | Retrospective chart review.                                                                                                                                                |
| <b>Participants</b>              | 22 patients who had chronic cancer-related pain and used opioids with the presence of THC in their urine drug screening were compared to 61 patients with opioid use only. |
| <b>Intervention (comparison)</b> | medical cannabis added to opioids (no cannabis).                                                                                                                           |
| <b>Follow-up</b>                 | 26 weeks.                                                                                                                                                                  |
| <b>Funding source</b>            | No industry funding reported.                                                                                                                                              |
| <b>Outcome</b>                   | -Reduction of opioid (calculated in average daily intravenous [IV] morphine equivalence dosages)                                                                           |

### Pawasarat-2020<sup>9</sup>

|                                  |                                                                                                                                                                                        |
|----------------------------------|----------------------------------------------------------------------------------------------------------------------------------------------------------------------------------------|
| <b>Study design</b>              | Retrospective chart review.                                                                                                                                                            |
| <b>Participants</b>              | 137 chronic cancer-related pain patients with chronic use of opioids enrolled in a State of New Jersey Medicinal Marijuana Program Registry were compared to 95 non-enrolled patients. |
| <b>Intervention (comparison)</b> | medical cannabis added to opioids (no cannabis).                                                                                                                                       |
| <b>Follow-up</b>                 | Between 36 and 52 weeks for enrolled patients and 24 weeks for non-enrolled patients.                                                                                                  |
| <b>Funding source</b>            | No industry funding reported.                                                                                                                                                          |
| <b>Outcome</b>                   | -Reduction of opioid (calculated in average daily intravenous [IV] morphine equivalence dosages)<br><br>-Pain reduction (VAS 0: no pain-10: most severe pain).                         |

Rod-2019<sup>10</sup>

|                                  |                                                                                                                                |
|----------------------------------|--------------------------------------------------------------------------------------------------------------------------------|
| <b>Study design</b>              | One-arm observational study (before/after).                                                                                    |
| <b>Participants</b>              | 600 of chronic pain patients who used opioids and indicated they were prepared to reduce their opioid dose.                    |
| <b>Intervention (comparison)</b> | Medical cannabis added to opioid (before using cannabis)                                                                       |
| <b>Follow-up</b>                 | 26 weeks                                                                                                                       |
| <b>Funding source</b>            | No industry funding reported.                                                                                                  |
| <b>Outcome</b>                   | - Reduction or cease of opioid use (reported as percentage of patients who ceased or reduced their opioid use after 6 months). |

Takakuwa et al-2020<sup>11</sup>

|                                  |                                                                                                                              |
|----------------------------------|------------------------------------------------------------------------------------------------------------------------------|
| <b>Study design</b>              | One-arm observational study (before/after).                                                                                  |
| <b>Participants</b>              | 61 of chronic non-cancer pain patients (low-back pain) who used opioids.                                                     |
| <b>Intervention (comparison)</b> | Medical cannabis added to opioid (before using cannabis)                                                                     |
| <b>Follow-up</b>                 | Median of 6.4 years among patients who ceased opioids completely                                                             |
| <b>Funding source</b>            | Industry funding reported.                                                                                                   |
| <b>Outcome</b>                   | - Reduction of opioid (calculated in median daily morphine equivalence dosages among chronic and intermittent opioid users). |

Vigil et al-2017<sup>12</sup>

|                                  |                                                                                                                                    |
|----------------------------------|------------------------------------------------------------------------------------------------------------------------------------|
| <b>Study design</b>              | Retrospective chart review.                                                                                                        |
| <b>Participants</b>              | 37 habitual opioid using, severe CNCP patients enrolled in the Medical Cannabis Program were compared to 29 non-enrolled patients. |
| <b>Intervention (comparison)</b> | Medical cannabis added to opioids (no cannabis).                                                                                   |
| <b>Follow-up</b>                 | 52 weeks                                                                                                                           |

|                       |                                                                                                                                                                                                                                                                                                                                                                                                                                                                                                        |
|-----------------------|--------------------------------------------------------------------------------------------------------------------------------------------------------------------------------------------------------------------------------------------------------------------------------------------------------------------------------------------------------------------------------------------------------------------------------------------------------------------------------------------------------|
| <b>Funding source</b> | No industry funding reported.                                                                                                                                                                                                                                                                                                                                                                                                                                                                          |
| <b>Outcome</b>        | <p>-Cessation of opioid (defined as the absence of opioid prescriptions activity during the last three months of observation)</p> <p>-Reduction of opioid (calculated in average daily intravenous [IV] morphine equivalence dosages);</p> <p>-Pain reduction only among cannabis users (VAS 0: no pain-10: most severe pain);</p> <p>-Quality of life (no effect; good benefit; great benefit; negative effect; and extremely negative effect of co-prescription of cannabis on quality of life).</p> |

### Yassin et al-2019<sup>13</sup>

|                                  |                                                                                                                                                                                                                                                                                                                                                                                                                                                   |
|----------------------------------|---------------------------------------------------------------------------------------------------------------------------------------------------------------------------------------------------------------------------------------------------------------------------------------------------------------------------------------------------------------------------------------------------------------------------------------------------|
| <b>Study design</b>              | One-arm observational study (before/after).                                                                                                                                                                                                                                                                                                                                                                                                       |
| <b>Participants</b>              | 31 patients with fibromyalgia were treated for at least 12 months with 5 mg of oxycodone hydrochloride equivalent to 4.5 mg oxycodone and 2.5 mg naloxone hydrochloride twice a day and duloxetine 30 mg once a day.                                                                                                                                                                                                                              |
| <b>Intervention (comparison)</b> | 20 grams of smoked medical cannabis added to opioids (before cannabis inhalation).                                                                                                                                                                                                                                                                                                                                                                |
| <b>Follow-up</b>                 | 26 weeks                                                                                                                                                                                                                                                                                                                                                                                                                                          |
| <b>Funding source</b>            | No industry funding reported.                                                                                                                                                                                                                                                                                                                                                                                                                     |
| <b>Outcome</b>                   | <p>-Pain reduction (VAS 0: no pain-10: most severe pain)</p> <p>-Change in pain medication use in 5 categories:<br/>1) increased doses, 2) stable dose through medical cannabis therapy duration, 3) less than half reduction in medication consumption, 4) more than half reduction in analgesic consumption, 5) decreased analgesic consumption.</p> <p>-Owestry Disability Index reduction (scale 0: no disability, 100: total disability)</p> |



Johnson et al-2010<sup>14</sup>

|                                  |                                                                                                                                                                                                                                                                                                                                                                                                |
|----------------------------------|------------------------------------------------------------------------------------------------------------------------------------------------------------------------------------------------------------------------------------------------------------------------------------------------------------------------------------------------------------------------------------------------|
| <b>Study design</b>              | Parallel, multi-center randomized double-blinded, placebo-controlled trial.                                                                                                                                                                                                                                                                                                                    |
| <b>Participants</b>              | 177 patients with chronic cancer pain who were under treatment by opioid regimen.                                                                                                                                                                                                                                                                                                              |
| <b>Intervention (comparison)</b> | tetrahydrocannabinol: cannabidiol (THC:CBD) extract added to opioids (placebo)                                                                                                                                                                                                                                                                                                                 |
| <b>Follow-up</b>                 | 2 weeks                                                                                                                                                                                                                                                                                                                                                                                        |
| <b>Funding source</b>            | Industry funding reported.                                                                                                                                                                                                                                                                                                                                                                     |
| <b>Outcome</b>                   | <ul style="list-style-type: none"> <li>- Reduction of opioid (calculated in mean daily morphine equivalence dosages)</li> <li>-Pain reduction (VAS 0: no pain-10: most severe pain)</li> <li>-Sleep disturbance (NRS 0: no disturbance-10: most severe disturbance)</li> <li>-Physical, emotional, role, and social functioning (QLQ-C30)</li> <li>-Nausea, vomiting, constipation.</li> </ul> |

Portenoy et al-2012<sup>15</sup>

|                                  |                                                                                                                                                                                                                                                                                                                           |
|----------------------------------|---------------------------------------------------------------------------------------------------------------------------------------------------------------------------------------------------------------------------------------------------------------------------------------------------------------------------|
| <b>Study design</b>              | Parallel, randomized double-blinded, placebo-controlled trial.                                                                                                                                                                                                                                                            |
| <b>Participants</b>              | 360 patients with chronic cancer pain who were under treatment by opioid regimen.                                                                                                                                                                                                                                         |
| <b>Intervention (comparison)</b> | Nabiximols at a low dose (1–4 sprays/day), medium dose (6–10 sprays/day), or high dose (11–16 sprays/day) added to opioids-(placebo)                                                                                                                                                                                      |
| <b>Follow-up</b>                 | 5 weeks                                                                                                                                                                                                                                                                                                                   |
| <b>Funding source</b>            | Industry funding reported.                                                                                                                                                                                                                                                                                                |
| <b>Outcome</b>                   | <ul style="list-style-type: none"> <li>- Reduction of opioid (calculated in mean daily morphine equivalence dosages)</li> <li>-Pain reduction (VAS 0: no pain-10: most severe pain)</li> <li>-Sleep disturbance (NRS 0: no disturbance-10: most severe disturbance)</li> <li>- Nausea, vomiting, constipation.</li> </ul> |

Fallon et al-2017-Study 1<sup>16</sup>

|                                  |                                                                                                                                                                                                                                                      |
|----------------------------------|------------------------------------------------------------------------------------------------------------------------------------------------------------------------------------------------------------------------------------------------------|
| <b>Study design</b>              | Parallel, multi-center randomized double-blinded, placebo-controlled trial.                                                                                                                                                                          |
| <b>Participants</b>              | 399 patients with chronic cancer pain who were under treatment by opioid regimen.                                                                                                                                                                    |
| <b>Intervention (comparison)</b> | Sativex ( $\Delta$ 9-tetrahydrocannabinol (27 mg/mL): cannabidiol (25 mg/mL) added to opioids (placebo)                                                                                                                                              |
| <b>Follow-up</b>                 | 5 weeks                                                                                                                                                                                                                                              |
| <b>Funding source</b>            | Industry funding reported.                                                                                                                                                                                                                           |
| <b>Outcome</b>                   | -Reduction of opioid (calculated in mean daily morphine equivalence dosages)<br>-Pain reduction (VAS 0: no pain-10: most severe pain)<br>-Sleep disturbance (NRS 0: no disturbance-10: most severe disturbance)<br>- Nausea, vomiting, constipation. |

Fallon et al-2017-Study 2<sup>16</sup>

|                                  |                                                                                                                                                                                                                                                                                  |
|----------------------------------|----------------------------------------------------------------------------------------------------------------------------------------------------------------------------------------------------------------------------------------------------------------------------------|
| <b>Study design</b>              | Parallel, multi-center randomized double-blinded, placebo-controlled trial.                                                                                                                                                                                                      |
| <b>Participants</b>              | 206 patients with chronic cancer pain who were under treatment by opioid regimen.                                                                                                                                                                                                |
| <b>Intervention (comparison)</b> | Sativex ( $\Delta$ 9-tetrahydrocannabinol (27 mg/mL): cannabidiol (25 mg/mL)) added to opioids (placebo)-patients who tolerated titrated dose of cannabis and showed an improvement of at least 15% on pain NRS score randomized into this study (randomized withdrawal design). |
| <b>Follow-up</b>                 | 5 weeks                                                                                                                                                                                                                                                                          |
| <b>Funding source</b>            | Industry funding reported.                                                                                                                                                                                                                                                       |
| <b>Outcome</b>                   | -Reduction of opioid (calculated in mean daily morphine equivalence dosages)<br>-Pain reduction (VAS 0: no pain-10: most severe pain)                                                                                                                                            |

-Sleep disturbance (NRS 0: no disturbance-10: most severe disturbance)

### Lichtman et al-2017<sup>17</sup>

|                                  |                                                                                                                                                                                                                 |
|----------------------------------|-----------------------------------------------------------------------------------------------------------------------------------------------------------------------------------------------------------------|
| <b>Study design</b>              | Parallel, multi-center randomized double-blinded, placebo-controlled trial.                                                                                                                                     |
| <b>Participants</b>              | 397 patients with chronic cancer pain who were under treatment by opioid regimen.                                                                                                                               |
| <b>Intervention (comparison)</b> | Nabiximols was added to opioids and was titrated the maximum allowed daily dosage of 10 sprays per day (placebo).                                                                                               |
| <b>Follow-up</b>                 | 5 weeks                                                                                                                                                                                                         |
| <b>Funding source</b>            | Industry funding reported.                                                                                                                                                                                      |
| <b>Outcome</b>                   | -Reduction of opioid (calculated in mean daily morphine equivalence dosages)<br>-Pain reduction (NRS 0: no pain-10: most severe pain)<br>-Sleep disturbance (NRS 0: no disturbance-10: most severe disturbance) |

**Supplement Table 5: Risk of bias assessment for RCTs**

| Study (author-year)       | Allocation concealment | Blinding of patients | Blinding of health care providers | Blinding of data collectors | Blinding of outcome assessors | Blinding of Data analyst | Loss to follow-up ( $\leq 20\%$ ) |
|---------------------------|------------------------|----------------------|-----------------------------------|-----------------------------|-------------------------------|--------------------------|-----------------------------------|
| Johnson et al-2010        | PYes                   | PYes                 | PYes                              | PYes                        | PYes                          | PNo                      | Plow-risk <sup>€</sup>            |
| Portenoy et al-2012       | DYes                   | DYes                 | PYes                              | PYes                        | PYes                          | PNo                      | Dhigh-risk <sup>£</sup>           |
| Fallon et al-2017 Study 1 | PYes                   | PYes                 | PYes                              | PYes                        | PYes                          | PNo                      | Dhigh-risk <sup>¥</sup>           |
| Fallon et al-2017 Study 2 | PYes                   | PYes                 | PYes                              | PYes                        | PYes                          | PNo                      | Plow-risk <sup>€</sup>            |
| Lichtman et al-2017       | PYes                   | PYes                 | PYes                              | PYes                        | PYes                          | PNo                      | Dhigh-risk <sup>¥</sup>           |

\* DYes: definitely yes; DNo: definitely no; PYes: probably yes; PNo: probably no

DYes/PYes= low risk of bias; DNo/PNo=high risk of bias.

<sup>£</sup> The rate of loss to follow-up was more than 27%.

<sup>¥</sup>The rate of loss to follow-up was approximately 26%.

<sup>€</sup>The rate of loss to follow-up was approximately less than 20%

All RCTs used intention-to-treat (ITT) analysis, which included all randomized patients who had at least one post-randomization efficacy endpoint into the analysis.

**Supplement Table 6: Risk of bias assessments for chart reviews with control group**

| Study          | Were the exposed and unexposed drawn from same | Are we confident in the assessment of exposure? | Can we be confident in the assessment of the presence or absence of prognostic | Can we be confident in the outcome assessment? | Was there adequate follow-up? | Were the co-interventions similar? | Did the authors adjust for different confounders? | Overall risk of bias |
|----------------|------------------------------------------------|-------------------------------------------------|--------------------------------------------------------------------------------|------------------------------------------------|-------------------------------|------------------------------------|---------------------------------------------------|----------------------|
| Vigil 2017     | DYes                                           | DNo                                             | PYes                                                                           | PNo                                            | PYes                          | PNo                                | PYes                                              | High                 |
| Maida 2008     | DYes                                           | DYes                                            | PYes                                                                           | DYes                                           | PNo                           | PNo                                | PYes                                              | High                 |
| Barlowe 2019   | DYes                                           | DNo                                             | PYes                                                                           | DYes                                           | PNo                           | PNo                                | PNo                                               | High                 |
| Pritchard-2020 | DYes                                           | DYes                                            | PYes                                                                           | DYes                                           | DNo                           | PNo                                | PNo                                               | High                 |
| Pawasarat-2020 | DYes                                           | DNo                                             | PYes                                                                           | DYes                                           | DYes                          | PNo                                | PNo                                               | High                 |

\* DYes: definitely yes; DNo: definitely no; PYes: probably yes; PNo: probably no  
 DYes/PYes= low risk of bias; DNo/PNo=high risk of bias.

**Supplement Table 7: Risk of bias assessments for one-arm studies with no control group**

| Study                   | Is the source population (sampling frame) representative of the general population? | Is the assessment of the outcome accurate both at baseline and at follow-up? | Is there little missing data? | Overall risk of bias |
|-------------------------|-------------------------------------------------------------------------------------|------------------------------------------------------------------------------|-------------------------------|----------------------|
| Haroutounian et al-2016 | DNo                                                                                 | DYes                                                                         | PNo                           | High                 |
| Narang et al-2008       | DNo                                                                                 | DYes                                                                         | PYes                          | High                 |
| Yassin et al-2019       | DNo                                                                                 | DYes                                                                         | PYes                          | High                 |
| O'Connell et al-2019    | DNo                                                                                 | DYes                                                                         | PYes                          | High                 |
| Takakuwa et al-2020     | DNo                                                                                 | DYes                                                                         | PYes                          | High                 |
| Vigil et al-2017        | DNo                                                                                 | PNo                                                                          | PYes                          | High                 |
| Bellnier-2018           | DNo                                                                                 | DYes                                                                         | DYes                          | High                 |
| Capano et al-2020       | DNo                                                                                 | DYes                                                                         | PNo                           | High                 |
| Rod-2019                | DNo                                                                                 | PNo                                                                          | PNo                           | High                 |

\* DYes: definitely yes; DNo: definitely no; PYes: probably yes; PNo: probably no  
 DYes/PYes= low risk of bias; DNo/PNo=high risk of bias.

**Table 8: Other reported outcomes in observational studies****Sleep disturbance results from two observational studies**

|                                                                                                                                         |                                                                                                                    |                                            |
|-----------------------------------------------------------------------------------------------------------------------------------------|--------------------------------------------------------------------------------------------------------------------|--------------------------------------------|
| Capano et <sup>3</sup> al assessed the effect of adding CBD among patients with chronic pain who were opioid users for at least 1 year. | The mean of Pittsburgh Sleep Quality Index* decreased from 12.09±4.1 at baseline to 10.3±4.3 at the end of week 8. | Very-low certainty evidence; p value=0.03  |
| Narang et al <sup>6</sup> also evaluated the impact of adding dronabinol among 30 patients taking opioids for chronic pain.             | The sleep disturbance decreased significantly at the end of week 4.                                                | Very low certainty evidence; p-value <0.01 |

\*Ranges between 0 to 21 with the higher total score (referred to as global score) indicating worse **sleep quality**.

**Other reported outcomes in one observational study**

|                                                                                                                                                                                     |
|-------------------------------------------------------------------------------------------------------------------------------------------------------------------------------------|
| Capano et <sup>3</sup> al reported that pain disability index <sup>1</sup> did not show a significant reduction, from 38.02±15.2 at baseline to 34.1±12.4 at week 4 (P-value=0.09). |
| Pain intensity and inference index <sup>2</sup> reduced from 6.5±1.9 to 5.7±2 after 8 weeks' follow up (P-value=0.006).                                                             |

<sup>1</sup>Ranges from 0 to 70 (The higher the index the greater the person's disability due to pain).

<sup>2</sup>PEG ranges from 0 to 10 (The higher the worse pain and interference).

**Table 9: GRADE evidence profile of cannabis adjuvant to opioids vs. opioid alone for physical function among patients with chronic pain from 1 RCT**

| Outcome                            | n of participants (studies)                     | Follow-up | Mean difference                                                                   | Certainty of evidence (GRADE) | Plain-language summary                                                     |
|------------------------------------|-------------------------------------------------|-----------|-----------------------------------------------------------------------------------|-------------------------------|----------------------------------------------------------------------------|
| Physical functioning <sup>14</sup> | Cannabis=118, placebo=59 (1 RCT <sup>14</sup> ) | Two weeks | THC: CBD vs. placebo: -4.23 ( $P=0.108$ )<br>THC vs. placebo: -1.25 ( $P=0.631$ ) | Moderate <sup>b</sup>         | Adding cannabis to opioids probably does not improve physical functioning. |

<sup>a</sup> In favor of placebo; <sup>b</sup> Due to imprecision.

**Table 10: GRADE evidence profile of cannabis adjuvant to opioids vs. opioid alone for emotional function among patients with chronic pain from 1 RCT**

| Outcome                             | n of participants (studies)                     | Follow-up | Mean difference                                                                 | Certainty of evidence (GRADE) | Plain-language summary                                                      |
|-------------------------------------|-------------------------------------------------|-----------|---------------------------------------------------------------------------------|-------------------------------|-----------------------------------------------------------------------------|
| Emotional functioning <sup>14</sup> | Cannabis=118, placebo=59 (1 RCT <sup>14</sup> ) | Two weeks | THC: CBD vs. placebo: 6.73 ( $P=0.084$ )<br>THC vs. placebo: 5.22 ( $P=0.174$ ) | Moderate <sup>b</sup>         | Adding cannabis to opioids probably does not improve emotional functioning. |

<sup>a</sup> In favor of cannabis; <sup>b</sup> Due to imprecision.



**Supplement Table 11: Summary of adverse events among included observational studies\***

| Study                           | Method of assessment                                   | Adverse events reported                                                                                                                                                                                                                                                                                                                                                                                                                                |
|---------------------------------|--------------------------------------------------------|--------------------------------------------------------------------------------------------------------------------------------------------------------------------------------------------------------------------------------------------------------------------------------------------------------------------------------------------------------------------------------------------------------------------------------------------------------|
| Haroutounian et al <sup>4</sup> | Self-reported.                                         | Two participants discontinued treatment due to serious side effects.                                                                                                                                                                                                                                                                                                                                                                                   |
| Maida et al <sup>5</sup>        | Self-reported                                          | Anxiety (P=0.028), nausea (P<0.001), and distress (P=0.021) were decreased significantly among patients who used nabilone in comparison to patients who did not use it.                                                                                                                                                                                                                                                                                |
| Narang et al <sup>6</sup>       | Self-reported (29-item symptom Side Effect Checklist). | <p><i>Phase II:</i> Dry mouth, tiredness (both P&lt;0.0001), abnormal thinking, anxiety, facial flushing, eye irritation, headache, and ringing in the ears, and drowsiness (P&lt;0.05) showed a significantly higher occurrence at the 20 mg dronabinol dose compared with placebo.</p> <p>-Dry mouth, difficulty speaking, forgetfulness, confusion, dizziness, and euphoria were more occurred in both treatment group versus placebo (P= 0.01)</p> |

|                                  |                |                                                                                                                                                                         |
|----------------------------------|----------------|-------------------------------------------------------------------------------------------------------------------------------------------------------------------------|
| <b>Vigil et al<sup>12</sup></b>  | Self-reported. | No respondents reported any serious side effects from cannabis use (only 9% of patients reported cannabis affected negatively their concentration).                     |
| <b>Yassin et al<sup>13</sup></b> | Self-reported  | Mostly mild adverse events were reported (e.g. red eye, sore throat, increase appetite); only 6 patients out of withdrew due to the side effects in non-cannabis group. |

\*O'Connell et al<sup>7</sup>, Barlowe et al<sup>1</sup>, Rod 2019, and Takakuwa et al<sup>11</sup> did not report adverse events.

Additional results tables and figures

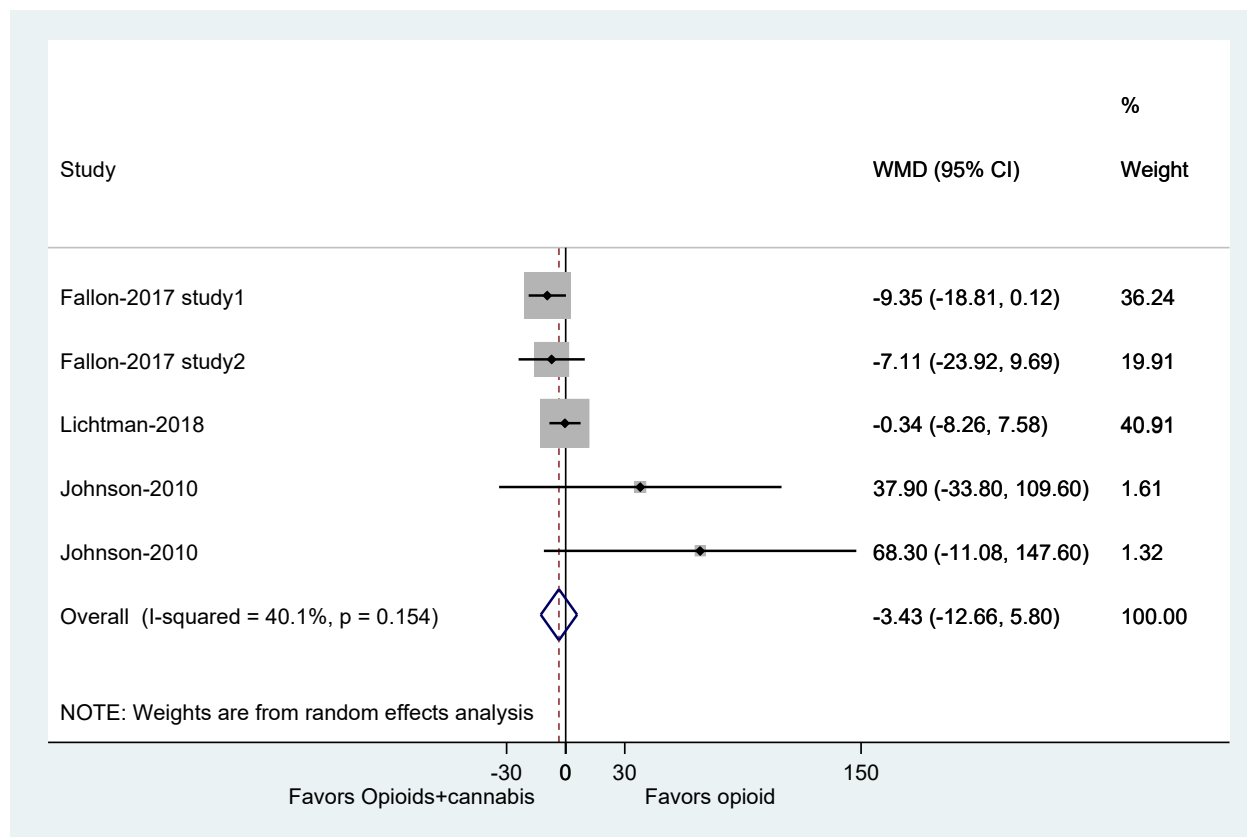

**Supplement Figure 1: forest plot for oral morphine equivalence dose reduction among patients with Chronic Pain who received cannabis adjuvant to opioids vs. opioid alone in RCTs**

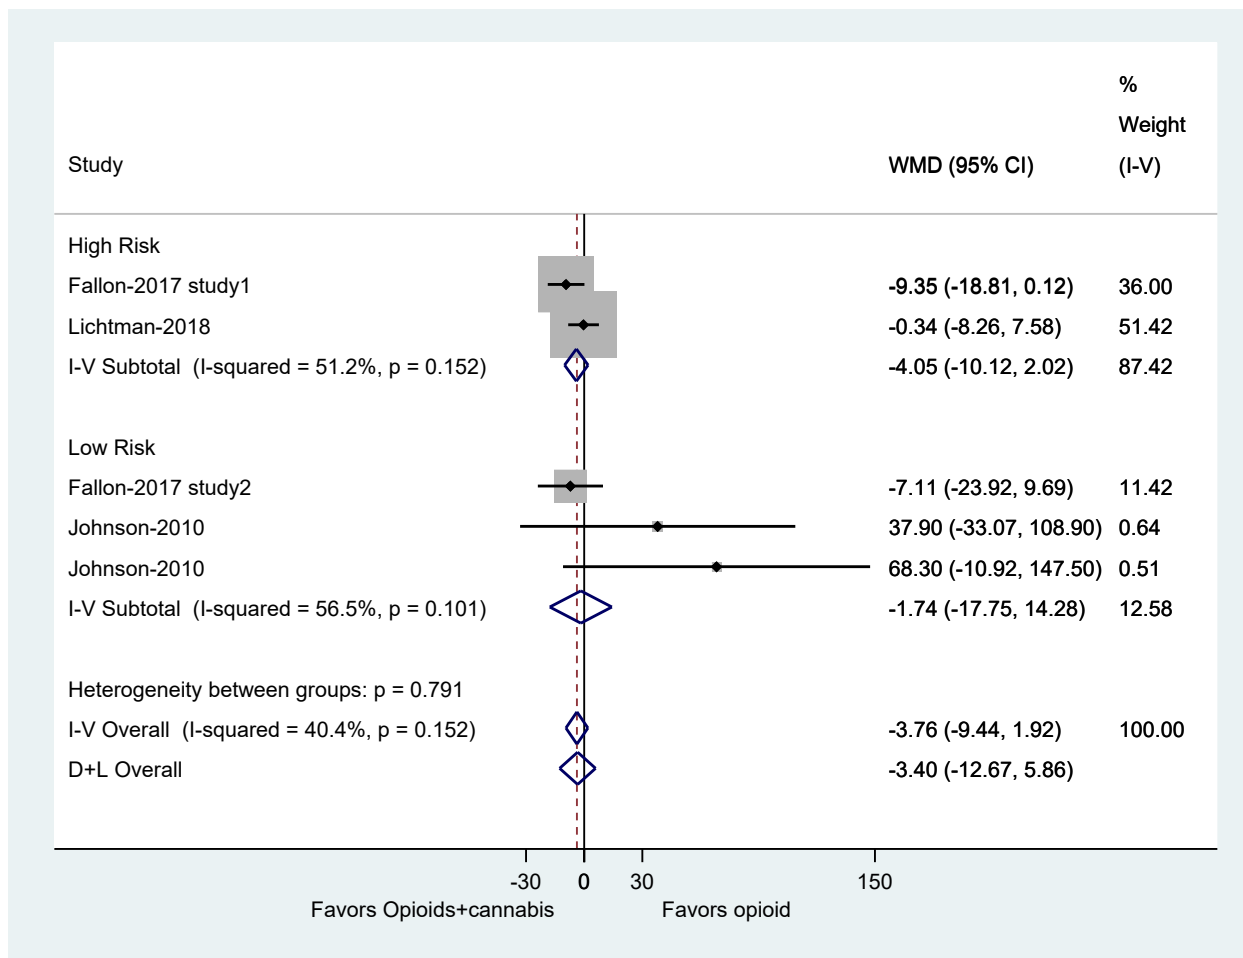

**Supplement Figure 2: Subgroup analysis for opioid dose reduction and risk of bias (high risk vs. low risk) from 4 RCTs of Cannabis+opioids vs. placebo**

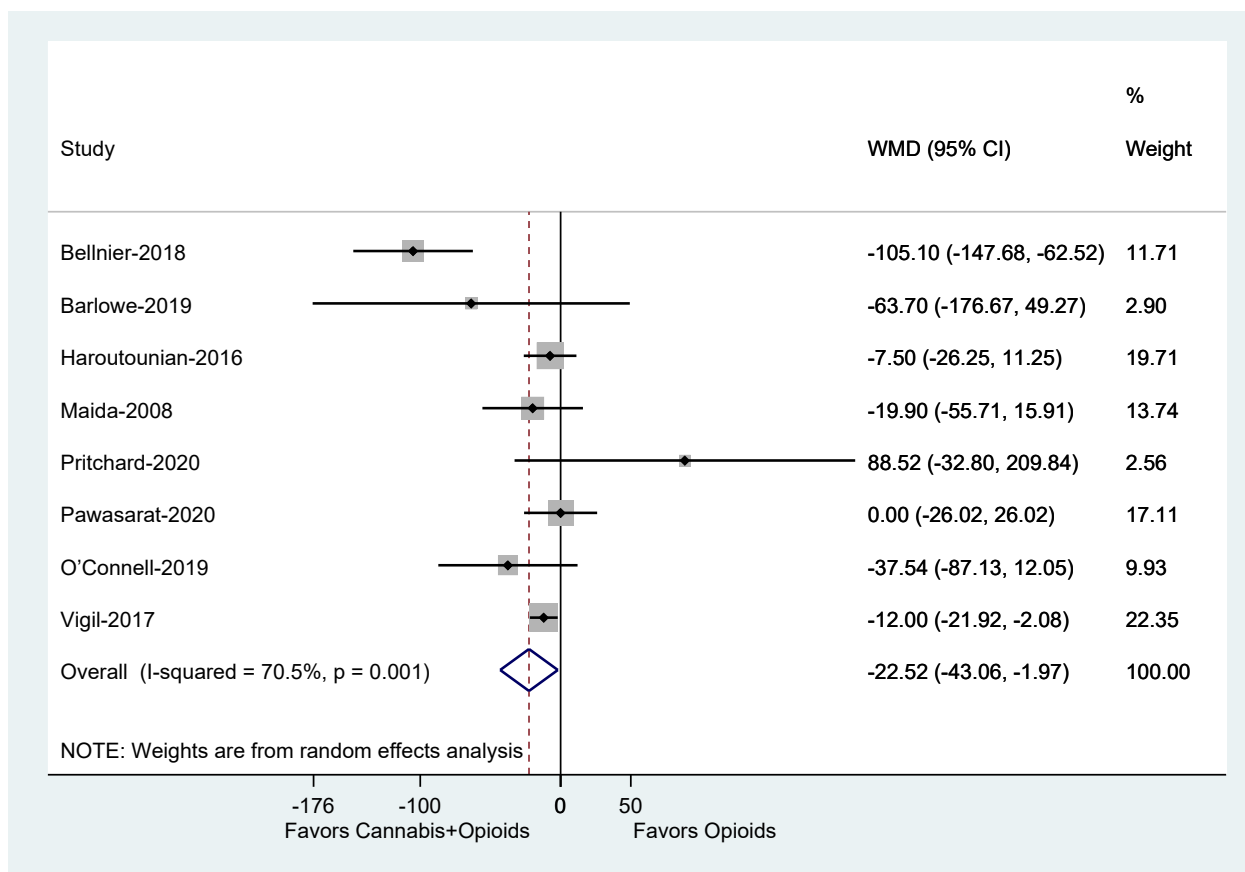

**Supplement Figure 3: forest plot for oral morphine equivalence dose reduction among patients with Chronic Pain who received cannabis adjuvant to opioids vs. opioid alone in observational studies**

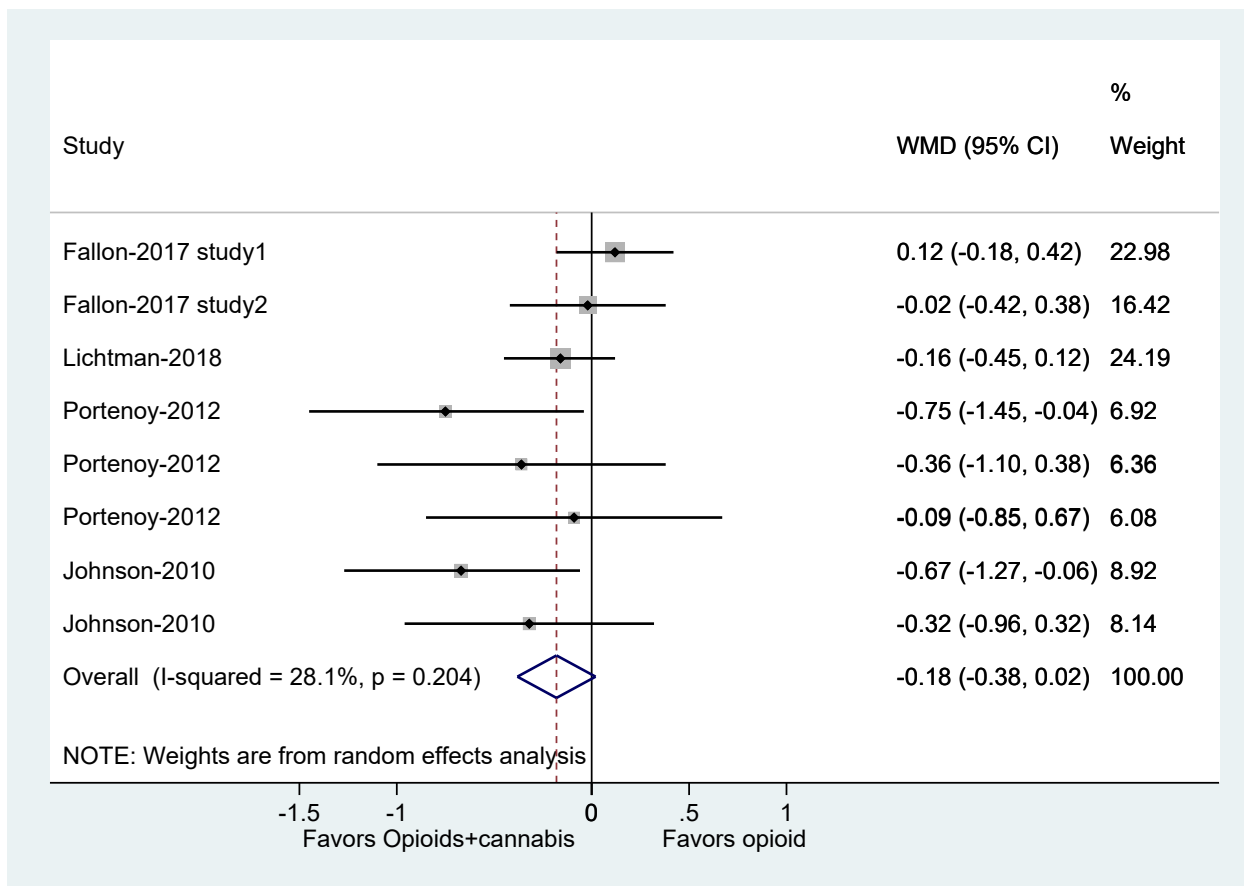

**Supplement Figure 4: forest plot for pain relief on a 10-cm Visual Analog Scale (VAS) among patients with Chronic Pain who received cannabis adjuvant to opioids vs. opioid alone in RCTs**

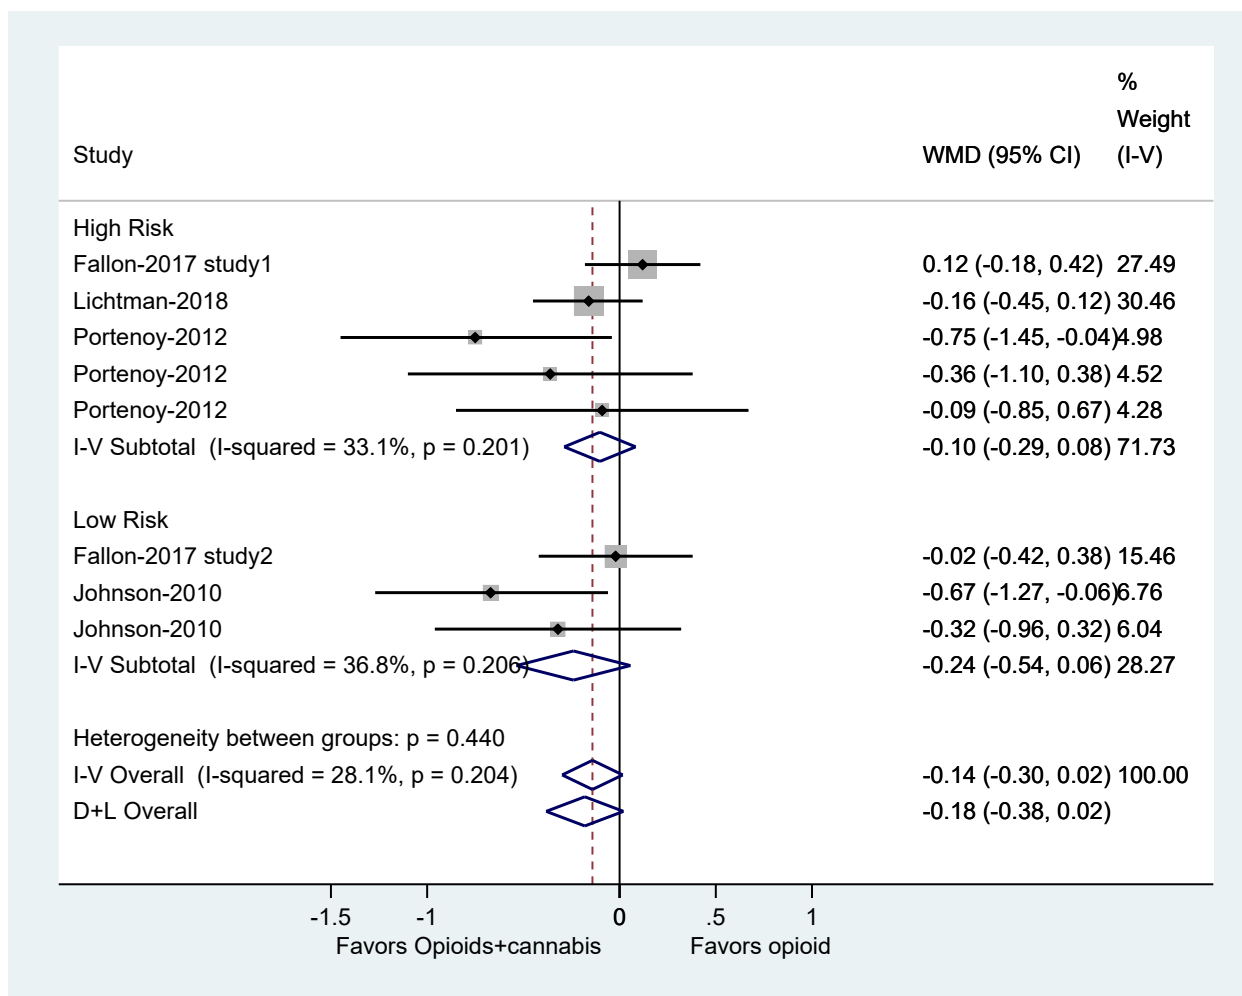

**Supplement Figure 5: Subgroup analysis for pain relief on a 10-cm VAS and risk of bias (high risk vs. low risk) from 5 RCTs of Cannabis+opioids vs. placebo**

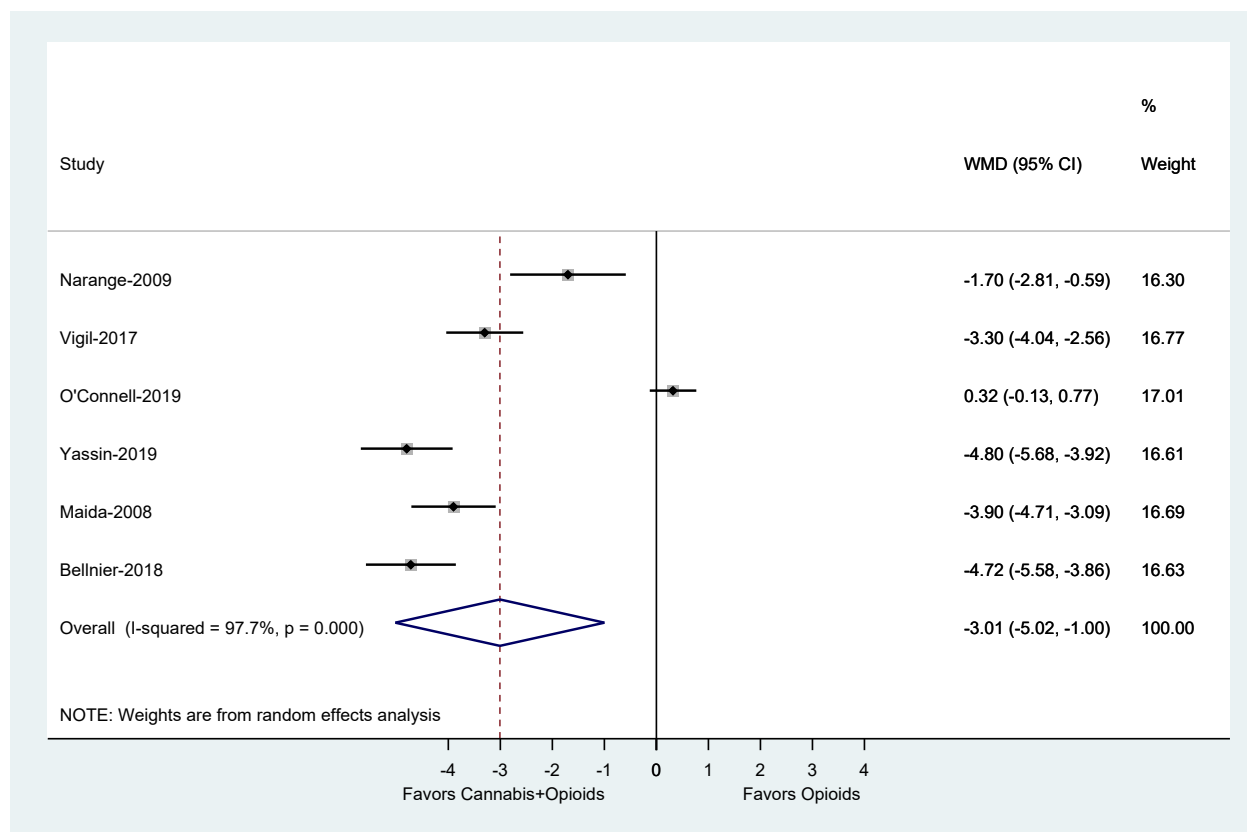

31  
32  
33  
34  
35  
36  
37  
38  
39  
40  
41  
42  
43  
44  
45  
46  
47  
48  
49  
50  
51  
52  
53  
54  
55  
56  
57  
58  
59  
60

**Supplement Figure 6: forest plot for pain relief on a 10-cm VAS among patients with Chronic Pain who received cannabis adjuvant to opioids vs. opioid alone in observational studies with no control group**



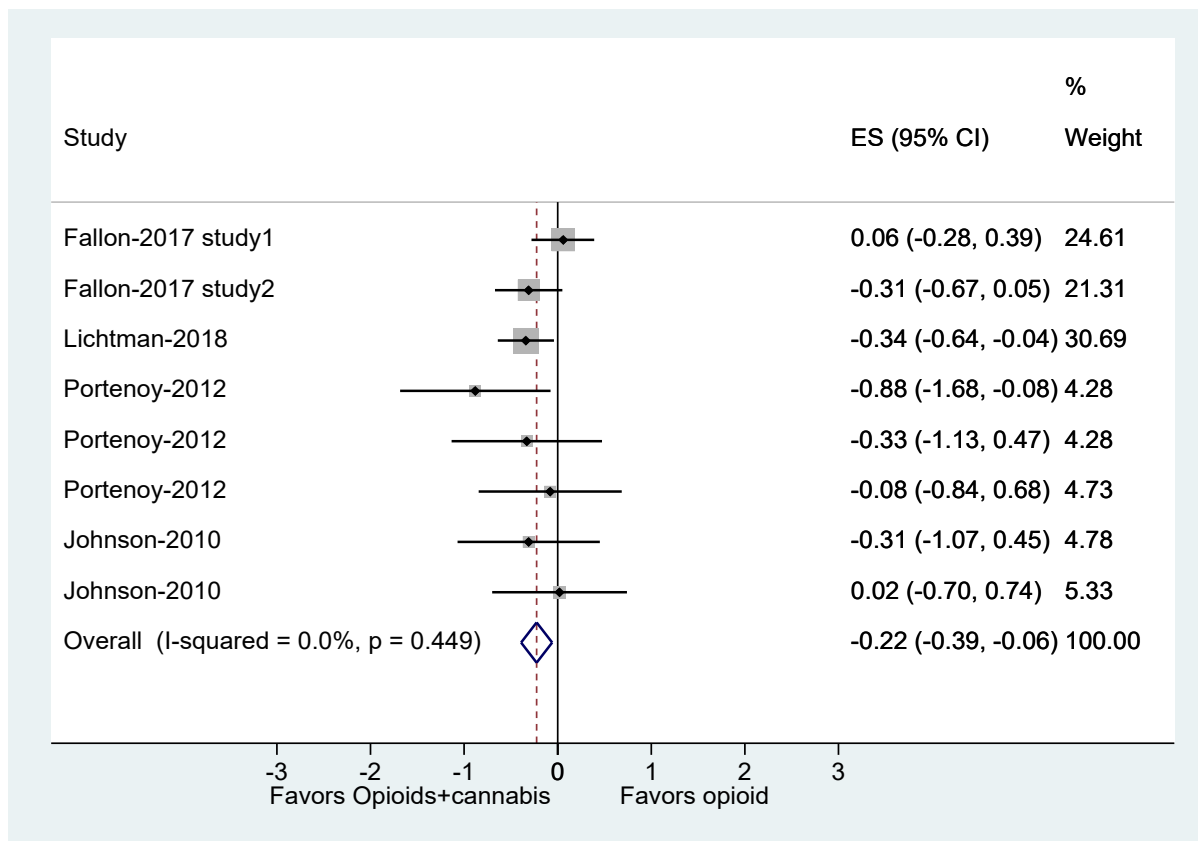

**Supplement Figure 7: forest plot for sleep disturbance on a 10 cm VAS for sleep disturbance among patients with Chronic Pain who received cannabis adjuvant to opioids vs. opioid alone in RCTs**



**Supplement Figure 8: Subgroup analysis for sleep disturbance a 10-cm VAS for sleep disturbance and risk of bias (high risk vs. low risk) from 5 RCTs of Cannabis+opioids vs. placebo**

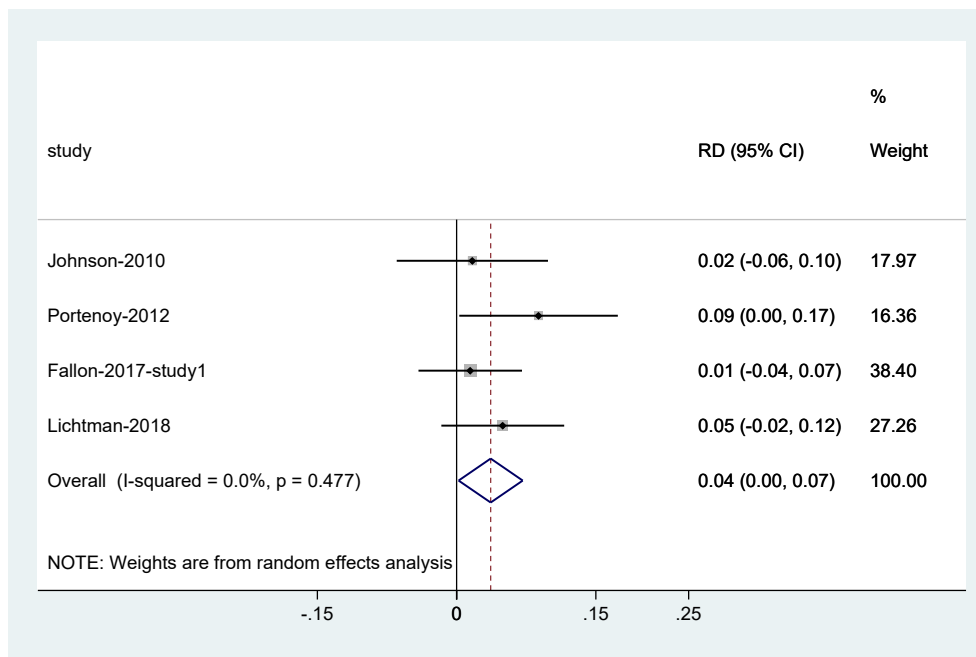

**Supplement Figure 9: Risk difference of nausea among patients with Chronic Pain who received cannabis adjuvant to opioids vs. opioid alone in RCTs**

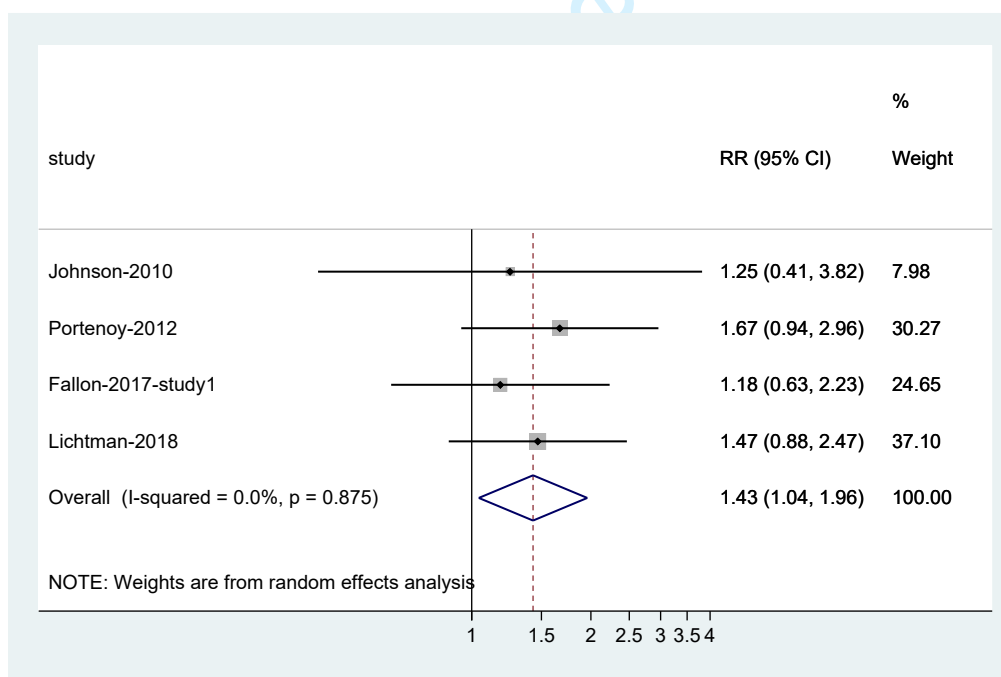

**Supplement Figure 10: Relative Risk of nausea among patients with Chronic Pain who received cannabis adjuvant to opioids vs. opioid alone in RCTs**

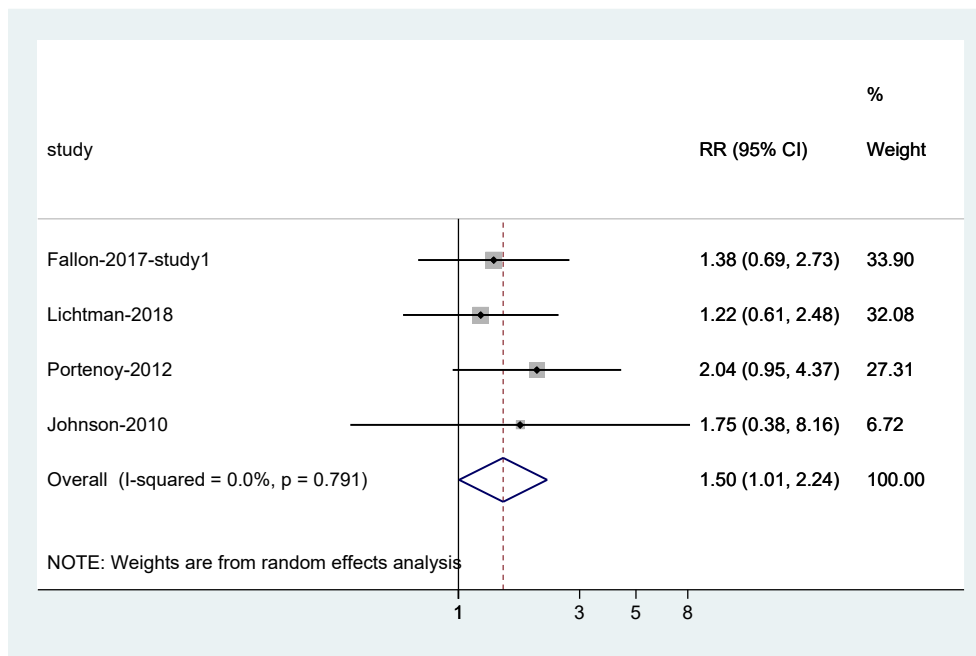

**Supplement Figure 11: Relative Risk of vomiting among patients with Chronic Pain who received cannabis adjuvant to opioids vs. opioid alone in RCTs**

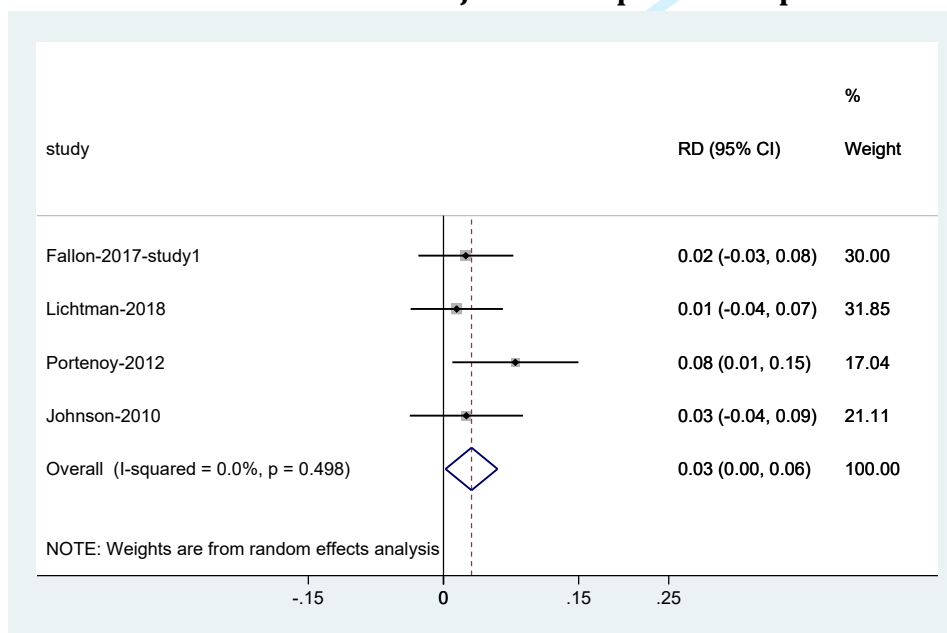

**Supplement Figure 12: Risk Difference of vomiting among patients with Chronic Pain who received cannabis adjuvant to opioids vs. opioid alone in RCTs**

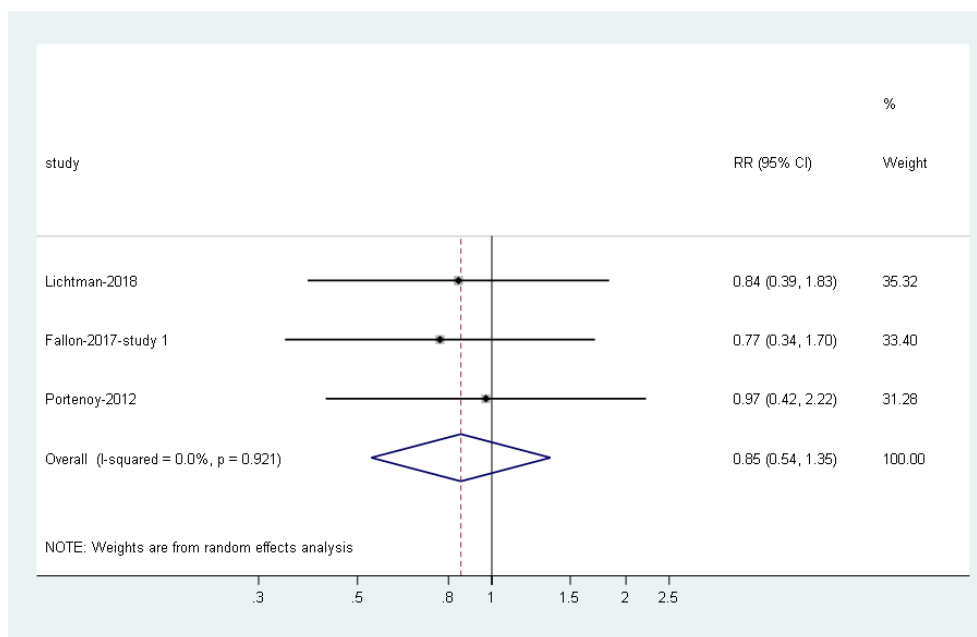

**Supplement Figure 13: Relative Risk of constipation among patients with Chronic Pain who received cannabis adjuvant to opioids vs. opioid alone in RCTs**

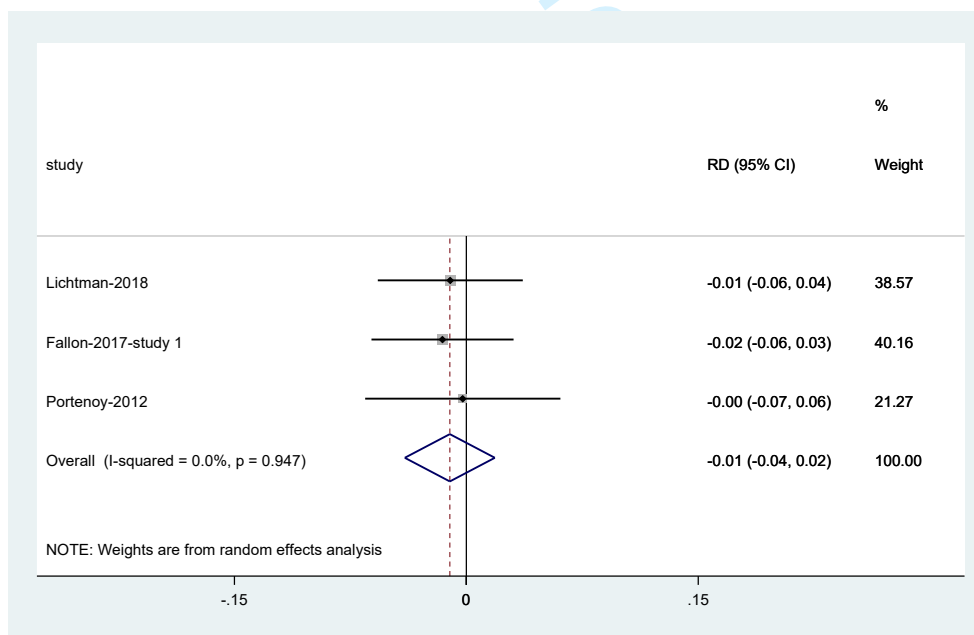

**Supplement Figure 14: Risk difference of constipation among patients with Chronic Pain who received cannabis adjuvant to opioids vs. opioid alone in RCTs**

## Appendix B: Reference List of Eligible studies

1. Barlowe TS, Koliiani-Pace JL, Smith KD, Gordon SR, Gardner TB. Effects of Medical Cannabis on Use of Opioids and Hospital Visits by Patients With Painful Chronic Pancreatitis. *Clin Gastroenterol Hepatol* 2019;17(12):2608-9.e1. doi: 10.1016/j.cgh.2019.01.018.
2. Bellnier T, Brown GW. Preliminary evaluation of the efficacy, safety, and costs associated with the treatment of chronic pain with medical cannabis. *Ment Health Clin* 2018;8(3):110-5. doi: 10.9740/mhc.2018.05.110.
3. Capano A, Weaver R, Burkman E. Evaluation of the effects of CBD hemp extract on opioid use and quality of life indicators in chronic pain patients: a prospective cohort study. *Postgrad Med* 2020;132(1):56-61. doi: 10.1080/00325481.2019.1685298.
4. Haroutounian S, Ratz Y, Ginosar Y, et al. The Effect of Medicinal Cannabis on Pain and Quality-of-Life Outcomes in Chronic Pain: A Prospective Open-label Study. *Clin J Pain* 2016;32(12):1036-43. doi: 10.1097/ajp.0000000000000364.
5. Maida V, Ennis M, Irani S, Corbo M, Dolzhykov M. Adjunctive nabilone in cancer pain and symptom management: a prospective observational study using propensity scoring. *J Support Oncol* 2008;6(3):119-24.
6. Narang S, Gibson D, Wasan AD, et al. Efficacy of dronabinol as an adjuvant treatment for chronic pain patients on opioid therapy. *J Pain* 2008;9(3):254-64. doi: 10.1016/j.jpain.2007.10.018.
7. O'Connell M, Sandgren M, Frantzen L, Bower E, Erickson B. Medical Cannabis: Effects on Opioid and Benzodiazepine Requirements for Pain Control. *Ann Pharmacother* 2019;53(11):1081-6. doi: 10.1177/1060028019854221.
8. Pritchard ER, Dayer L, Belz J, et al. Effect of cannabis on opioid use in patients with cancer receiving palliative care. *J Am Pharm Assoc (2003)* 2020;60(1):244-7. doi: 10.1016/j.japh.2019.10.013.
9. Pawasarat IM, Schultz EM, Frisby JC, et al. The Efficacy of Medical Marijuana in the Treatment of Cancer-Related Pain. *J Palliat Med* 2020;23(6):809-16. doi: 10.1089/jpm.2019.0374.

- 1  
2  
3 10. Rod K. A pilot study of a medical cannabis-opioid reduction program. *Am J Psychiatry*  
4  
5 *Neurosci* 2019;7(3):74. doi: 10.11648/j.ajpn.20190703.14.  
6
- 7 11. Takakuwa KM, Hergenrather JY, Shofer FS, Schears RM. The Impact of Medical Cannabis  
8 on Intermittent and Chronic Opioid Users with Back Pain: How Cannabis Diminished Prescription  
9 Opioid Usage. *Cannabis Cannabinoid Res* 2020;5(3):263-70. doi: 10.1089/can.2019.0039.  
10  
11
- 12 12. Vigil JM, Stith SS, Adams IM, Reeve AP. Associations between medical cannabis and  
13 prescription opioid use in chronic pain patients: A preliminary cohort study. *PLoS One*  
14 2017;12(11):e0187795. doi: 10.1371/journal.pone.0187795.  
15  
16
- 17 13. Yassin M, Oron A, Robinson D. Effect of adding medical cannabis to analgesic treatment in  
18 patients with low back pain related to fibromyalgia: an observational cross-over single centre study.  
19 *Clin Exp Rheumatol* 2019;37(Suppl 116):S13-S20.  
20  
21
- 22 14. Johnson JR, Burnell-Nugent M, Lossignol D, et al. Multicenter, double-blind, randomized,  
23 placebo-controlled, parallel-group study of the efficacy, safety, and tolerability of THC:CBD extract  
24 and THC extract in patients with intractable cancer-related pain. *J Pain Symptom Manage*  
25 2010;39(2):167-79. doi: 10.1016/j.jpainsymman.2009.06.008.  
26  
27
- 28 15. Portenoy RK, Ganae-Motan ED, Allende S, et al. Nabiximols for opioid-treated cancer  
29 patients with poorly-controlled chronic pain: a randomized, placebo-controlled, graded-dose trial. *J*  
30 *Pain* 2012;13(5):438-49. doi: 10.1016/j.jpain.2012.01.003.  
31  
32
- 33 16. Fallon MT, Albert Lux E, McQuade R, et al. Sativex oromucosal spray as adjunctive therapy  
34 in advanced cancer patients with chronic pain unalleviated by optimized opioid therapy: two double-  
35 blind, randomized, placebo-controlled phase 3 studies. *Br J Pain* 2017;11(3):119-33. doi:  
36 10.1177/2049463717710042.  
37  
38
- 39 17. Lichtman AH, Lux EA, McQuade R, et al. Results of a Double-Blind, Randomized, Placebo-  
40 Controlled Study of Nabiximols Oromucosal Spray as an Adjunctive Therapy in Advanced Cancer  
41 Patients with Chronic Uncontrolled Pain. *J Pain Symptom Manage* 2018;55(2):179-88.e1. doi:  
42 10.1016/j.jpainsymman.2017.09.001.  
43  
44  
45  
46  
47  
48  
49  
50  
51  
52  
53  
54  
55  
56  
57  
58  
59  
60

## Technical Appendix

This appendix provides additional details on two different methods of estimation, including 1) estimating the mean and standard deviation (SD) from sample size, median, and interquartile range (IQR); 2) estimating missing SD (for two non-randomized studies<sup>5,7</sup>) using the available SD from other included studies.

### 1) Estimating the mean and standard deviation (SD) from sample size, median, and IQR:

1) Pawasarat et al 2020 original reported data: median total morphine equivalent=45, n=137, and IQR=135.

-Using Wan et al method<sup>1</sup> produced: mean=60, SD=101

-Method recommended by Cochrane as *sensitivity analysis*:

$$S \approx \frac{q_3 - q_1}{1.35}$$

$q_3 - q_1 = \text{IQR}$ . This method produced SD=100.

2) Bellnier et al 2018 original reported data: median total morphine equivalent (before adding cannabis) =79.94, range=0 to 450, median (after adding cannabis) =19.65; range =0 to 150, n=29.

-Using Wan et al method produced: mean (before)=152.4, SD=111; mean (after)=47.3, SD=37.0

-Using Cochrane approach (Hozo et al<sup>3</sup>): Mean (before)= 152.4, SD= 112.5; mean (after)= 47.3, SD= 37.5

We finally included estimation by Wan et al method. The excel sheet including all formula was provided by Wan et al in supplementary file of their article<sup>1</sup>.

### 2) Estimating missing SD using the available SD from other included studies:

1) Maida et al 2008 did not report SD around the mean at the end of follow-up for pain intensity. Original reported data: mean (SD) before adding cannabis=7.1(2.4); after adding cannabis mean=3 (missing)



- 1  
2  
3 2) Connell et al 2019 original reported data: mean (SD) before adding cannabis=6.25  
4 (missing); mean after adding cannabis=6.57 (missing)  
5  
6  
7

8 We imputed missing SDs for these two studies from the given SDs related to other  
9 five included studies using prognostic method that presented by Ma et al<sup>2</sup>:  
10  
11

$$SEM_j^* = \frac{\sum_{i=1}^k SEM_i \sqrt{n_i}}{k \sqrt{n_j^*}}$$

12  
13 Assume there are k + 1 trials altogether where k trials are with full given information  
14  
15  
16  
17

18 SEM: value for trial *j* (*missing*) with sample size:  
19

20 *n<sub>j</sub>*: sample size for study with missing information.  
21  
22

23 SD (imputed) for first study= 1.51  
24

25 SDs (imputed) for second study=1.76, 1.20  
26  
27  
28  
29

30  
31 <sup>1</sup> Wan X, Wang W, Liu J, et al. Estimating the sample mean and standard deviation from the sample size,  
32 median, range and/or interquartile range. BMC medical research methodology 2014;**14**(1):135.

33 <sup>2</sup> Ma J, Liu W, Hunter A, et al. Performing meta-analysis with incomplete statistical information in clinical  
34 trials. BMC medical research methodology 2008;**8**(1):56.  
35

36 <sup>3</sup> Hozo, S.P., Djulbegovic, B. & Hozo, I. Estimating the mean and variance from the median, range, and the  
37 size of a sample. BMC Med Res Methodol 5, 13 (2005). <https://doi.org/10.1186/1471-2288-5-13>  
38  
39  
40  
41  
42  
43  
44  
45  
46  
47  
48  
49  
50  
51  
52  
53  
54  
55  
56  
57  
58  
59  
60

| Section/topic                      | #  | Checklist item                                                                                                                                                                                                                                                                                              | Reported on page # |
|------------------------------------|----|-------------------------------------------------------------------------------------------------------------------------------------------------------------------------------------------------------------------------------------------------------------------------------------------------------------|--------------------|
| <b>TITLE</b>                       |    |                                                                                                                                                                                                                                                                                                             |                    |
| Title                              | 1  | Identify the report as a systematic review, meta-analysis, or both.                                                                                                                                                                                                                                         | 1                  |
| <b>ABSTRACT</b>                    |    |                                                                                                                                                                                                                                                                                                             |                    |
| Structured summary                 | 2  | Provide a structured summary including, as applicable: background; objectives; data sources; study eligibility criteria, participants, and interventions; study appraisal and synthesis methods; results; limitations; conclusions and implications of key findings; systematic review registration number. | 3-4                |
| <b>INTRODUCTION</b>                |    |                                                                                                                                                                                                                                                                                                             |                    |
| Rationale                          | 3  | Describe the rationale for the review in the context of what is already known.                                                                                                                                                                                                                              | 5                  |
| Objectives                         | 4  | Provide an explicit statement of questions being addressed with reference to participants, interventions, comparisons, outcomes, and study design (PICOS).                                                                                                                                                  | 5                  |
| <b>METHODS</b>                     |    |                                                                                                                                                                                                                                                                                                             |                    |
| Protocol and registration          | 5  | Indicate if a review protocol exists, if and where it can be accessed (e.g., Web address), and, if available, provide registration information including registration number.                                                                                                                               | 6                  |
| Eligibility criteria               | 6  | Specify study characteristics (e.g., PICOS, length of follow-up) and report characteristics (e.g., years considered, language, publication status) used as criteria for eligibility, giving rationale.                                                                                                      | 6                  |
| Information sources                | 7  | Describe all information sources (e.g., databases with dates of coverage, contact with study authors to identify additional studies) in the search and date last searched.                                                                                                                                  | 6                  |
| Search                             | 8  | Present full electronic search strategy for at least one database, including any limits used, such that it could be repeated.                                                                                                                                                                               | 6                  |
| Study selection                    | 9  | State the process for selecting studies (i.e., screening, eligibility, included in systematic review, and, if applicable, included in the meta-analysis).                                                                                                                                                   | 7                  |
| Data collection process            | 10 | Describe method of data extraction from reports (e.g., piloted forms, independently, in duplicate) and any processes for obtaining and confirming data from investigators.                                                                                                                                  | 7                  |
| Data items                         | 11 | List and define all variables for which data were sought (e.g., PICOS, funding sources) and any assumptions and simplifications made.                                                                                                                                                                       | 7                  |
| Risk of bias in individual studies | 12 | Describe methods used for assessing risk of bias of individual studies (including specification of whether this was done at the study or outcome level), and how this information is to be used in any data synthesis.                                                                                      | 7-8                |
| Summary measures                   | 13 | State the principal summary measures (e.g., risk ratio, difference in means).                                                                                                                                                                                                                               | 8                  |
| Synthesis of results               | 14 | Describe the methods of handling data and combining results of studies, if done, including measures of consistency (e.g., $I^2$ ) for each meta-analysis.                                                                                                                                                   | 8                  |

| Section/topic | # | Checklist item | Reported on page # |
|---------------|---|----------------|--------------------|
|---------------|---|----------------|--------------------|

|    |                               |    |                                                                                                                                                                                                          |       |
|----|-------------------------------|----|----------------------------------------------------------------------------------------------------------------------------------------------------------------------------------------------------------|-------|
| 1  | Risk of bias across studies   | 15 | Specify any assessment of risk of bias that may affect the cumulative evidence (e.g., publication bias, selective reporting within studies).                                                             | 9     |
| 2  | Additional analyses           | 16 | Describe methods of additional analyses (e.g., sensitivity or subgroup analyses, meta-regression), if done, indicating which were pre-specified.                                                         | 9-10  |
| 3  | <b>RESULTS</b>                |    |                                                                                                                                                                                                          |       |
| 4  | <b>RESULTS</b>                |    |                                                                                                                                                                                                          |       |
| 5  | Study selection               | 17 | Give numbers of studies screened, assessed for eligibility, and included in the review, with reasons for exclusions at each stage, ideally with a flow diagram.                                          | 11    |
| 6  | Study characteristics         | 18 | For each study, present characteristics for which data were extracted (e.g., study size, PICOS, follow-up period) and provide the citations.                                                             | 11    |
| 7  | Risk of bias within studies   | 19 | Present data on risk of bias of each study and, if available, any outcome level assessment (see item 12).                                                                                                | 12    |
| 8  | Results of individual studies | 20 | For all outcomes considered (benefits or harms), present, for each study: (a) simple summary data for each intervention group (b) effect estimates and confidence intervals, ideally with a forest plot. | 12-14 |
| 9  | Synthesis of results          | 21 | Present results of each meta-analysis done, including confidence intervals and measures of consistency.                                                                                                  | 12-14 |
| 10 | Risk of bias across studies   | 22 | Present results of any assessment of risk of bias across studies (see Item 15).                                                                                                                          | 9     |
| 11 | Additional analysis           | 23 | Give results of additional analyses, if done (e.g., sensitivity or subgroup analyses, meta-regression [see Item 16]).                                                                                    | 12-14 |
| 12 | <b>DISCUSSION</b>             |    |                                                                                                                                                                                                          |       |
| 13 | <b>DISCUSSION</b>             |    |                                                                                                                                                                                                          |       |
| 14 | Summary of evidence           | 24 | Summarize the main findings including the strength of evidence for each main outcome; consider their relevance to key groups (e.g., healthcare providers, users, and policy makers).                     | 15    |
| 15 | Limitations                   | 25 | Discuss limitations at study and outcome level (e.g., risk of bias), and at review-level (e.g., incomplete retrieval of identified research, reporting bias).                                            | 15    |
| 16 | Conclusions                   | 26 | Provide a general interpretation of the results in the context of other evidence, and implications for future research.                                                                                  | 16    |
| 17 | <b>FUNDING</b>                |    |                                                                                                                                                                                                          |       |
| 18 | <b>FUNDING</b>                |    |                                                                                                                                                                                                          |       |
| 19 | Funding                       | 27 | Describe sources of funding for the systematic review and other support (e.g., supply of data); role of funders for the systematic review.                                                               | 17    |
